# Supplementary material
Source: PubMed Central journal article supplement (PMC7958298)
Supplement: NIHMS1669020-supplement-Supporting_Information.pdf [file NIHMS1669020-supplement-Supporting_Information.pdf]

## Supporting Information

### **Discovery of nucleic acid binding molecules from combinatorial biohybrid nucleobase peptide libraries**

Sebastian Pomplun,<sup>1</sup> Zachary P. Gates,<sup>1,†</sup> Genwei Zhang,<sup>1</sup> Anthony J. Quartararo,<sup>1</sup> Bradley L. Pentelute<sup>1-4\*</sup>

<sup>1</sup> Massachusetts Institute of Technology, Department of Chemistry, 77 Massachusetts Avenue, Cambridge, MA 02139, USA

<sup>2</sup> The Koch Institute for Integrative Cancer Research, Massachusetts Institute of Technology, 500 Main Street, Cambridge, MA 02142, USA

<sup>3</sup> Center for Environmental Health Sciences, Massachusetts Institute of Technology, 77 Massachusetts Avenue, Cambridge, MA 02139, USA

<sup>4</sup> Broad Institute of MIT and Harvard, 415 Main Street, Cambridge, MA 02142, USA

† Present address: Agency for Science, Technology and Research (A\*STAR), p53Lab, 8A Biomedical Grove, Singapore 138648, Singapore

\*Correspondence to: blp@mit.edu

## Contents

|                                                                                             |     |
|---------------------------------------------------------------------------------------------|-----|
| General materials and methods .....                                                         | 3   |
| Preparative organic synthesis of Fmoc protected nucleobase amino acid monomers.....         | 4   |
| Schemes .....                                                                               | 4   |
| Synthesis procedures .....                                                                  | 6   |
| NMR spectra .....                                                                           | 17  |
| Peptide synthesis procedures.....                                                           | 37  |
| Nucleobase peptide and peptide characterization.....                                        | 38  |
| Synthesis and de novo sequencing of three nucleobase peptides test libraries.....           | 52  |
| Synthesis and characterization of a 10 <sup>8</sup> -member nucleobase peptide library..... | 67  |
| ELISA.....                                                                                  | 105 |
| Affinity selection .....                                                                    | 105 |
| General procedure for biolayer interferometry (BLI) .....                                   | 106 |

## General materials and methods

**Chemicals:** Unless otherwise noted, all chemicals were obtained from commercial sources and used as received without further purification. Anhydrous tetrahydrofuran (THF) and *N,N*-diisopropylethylamine (DIEA) were obtained from a Seca Solvent Purification System by Pure Process Technology.

**LC-MS analysis:** LC-MS chromatograms and associated mass spectra were acquired using an Agilent 6550 ESI-QToF mass spectrometer or an Agilent 6520 ESI-QToF mass spectrometer. Mobile phases used for LC-MS analysis were solvent A (0.1% formic acid in water) and solvent B (0.1% formic acid in acetonitrile). The following LC-MS methods were used:

*Method A:* On 6550 MS; C<sub>4</sub> Phenomenex Jupiter column (1 x 150 mm, 5 μm); LC conditions: 1% B from 0–2 minutes, linear ramp from 5% to 61% B from 2–12 minutes, 0.1 mL/min flow rate.

*Method B:* On 6520 MS; Zorbax 300SB-C<sub>3</sub> column (2.1 x 150 mm, 5 μm); LC conditions: 1% B from 0–2 min, linear ramp from 5% to 61% B from 2–12 min, linear ramp from 61% to 90% 11–12 min, 0.8 mL/min flow rate.

**NMR analysis:** NMR spectra were acquired on 400 or 500 MHz Bruker spectrometers at ambient temperature. Samples were prepared in chloroform-*d* (DMSO-*d*<sub>6</sub> or CDCl<sub>3</sub>). <sup>1</sup>H NMR data are reported as chemical shifts with multiplicity, coupling constants (J) in Hz, and integrations. Proton chemical shifts are reported in ppm (δ) relative to tetramethylsilane (δ 0.00 ppm) and referenced to residual solvent (CHCl<sub>3</sub>, δ 7.26 ppm or DMSO-*d*<sub>6</sub>, δ 2.50 ppm (quintet, J<sub>HD</sub>=1.9 Hz)).<sup>1</sup> Multiplicity is reported as follows: singlet (s), broad singlet (bs), doublet (d), doublet of doublets (dd), triplet (t), quartet (q), multiplet (m), and overlapping multiplets (comp). <sup>13</sup>C NMR spectra were recorded on 500 (<sup>13</sup>C 126) MHz Bruker spectrometers with proton decoupling at ambient temperature, unless otherwise noted. Carbon chemical shifts are reported in ppm (δ) and referenced to solvent (CDCl<sub>3</sub>, δ 77.16 ppm).<sup>1</sup>

**Nano-LC/MSMS analysis of peptide libraries:** Nano-LC/MSMS analysis of library bead mixtures was performed on Thermo Fisher Orbitrap Fusion Lumos Tribrid Mass Spectrometer coupled to Thermo Fisher EASY-nLC 1200 System equipped with an Acclaim PepMap RSLC C18 column (150 mm x 75 μm ID, 2 μm particle size, 100 Å pore size) and a nanoViper C18 Trap Column (20 mm x 75 μm ID, 3 μm particle size, 100 Å pore size). The standard nano-LC method was run at 40 °C and a flow rate of 300 nL/min with the following gradient: 1% of 80% acetonitrile in water with 0.1% formic acid added (solvent B') in water containing 0.1% FA (solvent A') ramping linearly to 5% B' in A' over 2 minutes, followed by 5–61% B' in A' ramping linearly over 118 minutes, followed by 61–99% B' in A' ramping linearly over 5 minutes and finally 99% B' in A' for 5 minutes. MS<sup>2</sup> acquisition over the course of the method was performed in a data-dependent style (Top N=15, z=2–10, intensity threshold = 10<sup>5</sup>) with a dynamic precursor exclusion for 30 seconds after each scan. CID and HCD fragmentation 9 spectra were acquired for every selected precursor ion. Orbitrap was used as a detection method for both primary (resolution = 120000) and secondary (resolution = 30000) mass spectra.

**Purification:** Normal-phase column chromatography was performed with a Biotage Selekt flash purification system, equipped with 25 g or 100 g Biotage Sfär Silica HC-D 20 μm columns, using an appropriate gradient of EtOAc/Hexanes. Reversed-phase column chromatography was performed with a Biotage Selekt flash purification system equipped with either 10 g Biotage SNAP Bio C18 20 μm columns or 25 g Biotage Sfär Bio C18 D 20 μm columns with an appropriate gradient of MeCN/H<sub>2</sub>O (0.1% TFA). Reversed-phase preparative HPLC was performed using an Agilent mass directed purification system (1260 infinity LC and 6130 single quad MS), equipped with an Agilent Zorbax SB C3 column (9.4 x 250 mm, 5 μm), using an appropriate gradient of MeCN/H<sub>2</sub>O (0.1% TFA).

## Preparative organic synthesis of Fmoc protected nucleobase amino acid monomers

### Schemes

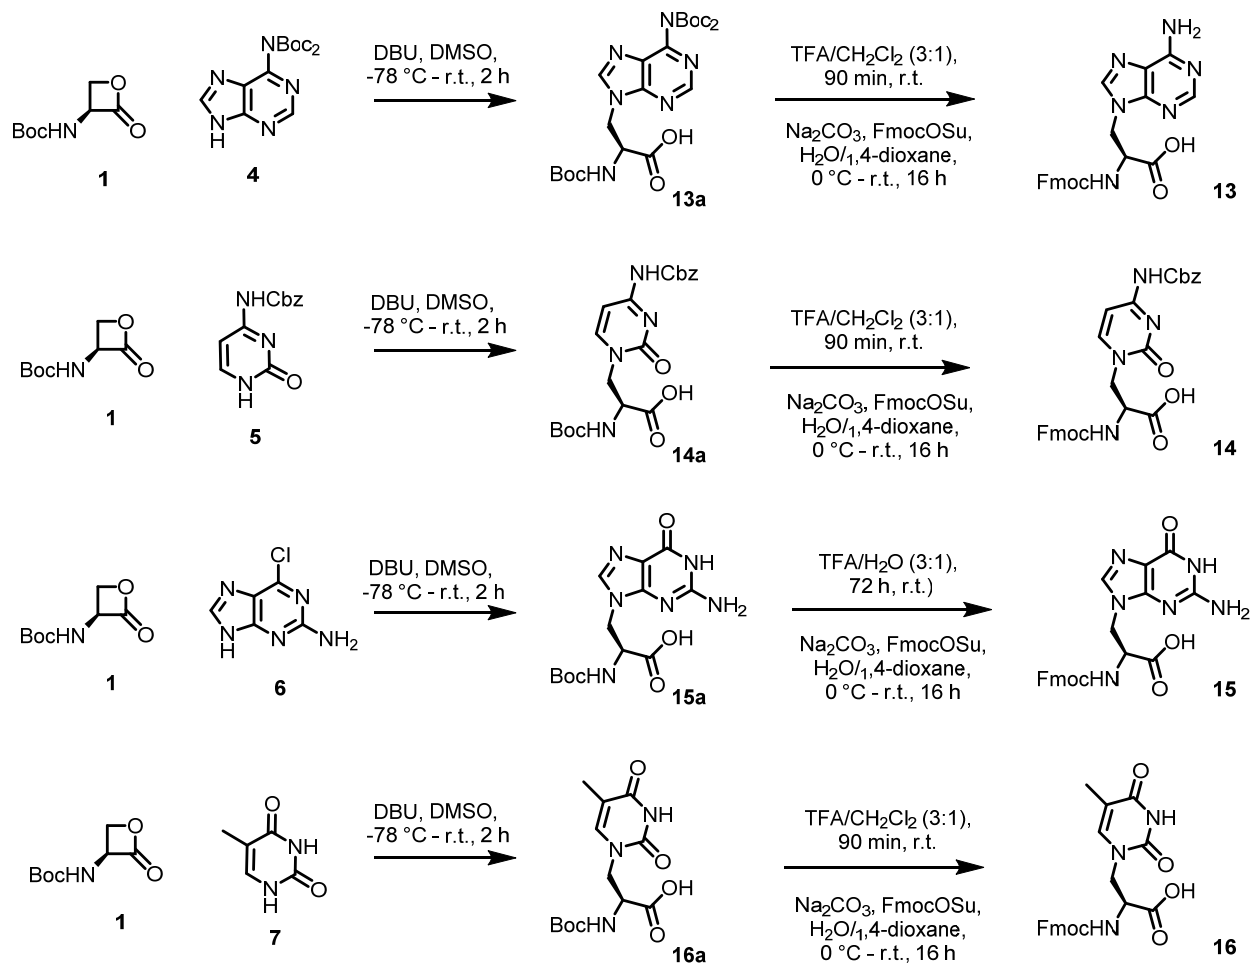

**SI Scheme 1. Synthesis of alanyl nucleobase monomers. Protecting group discussion:** Attempts to use adenine without any N6 protecting group produced both **13a** and its regioisomer (7-adenilyl; data not shown). The bis-Boc protection on N6 directs the nucleophilic ring opening to the desired 9-adenilyl isomer. **13** could be used for SPPS without protecting on N6: no side reaction due to amide couplings on N6 were observed. Cytosine could be used without any N4 protecting groups: the monomer synthesis was successful and during SPPS no side reaction due to amide couplings on N4 were observed. After SPPS, however, we observed 20 - 30% elimination of the cytosine nucleobase from the nucleopeptides. N4-Cbz protection prevented this (not further investigated) side reaction.

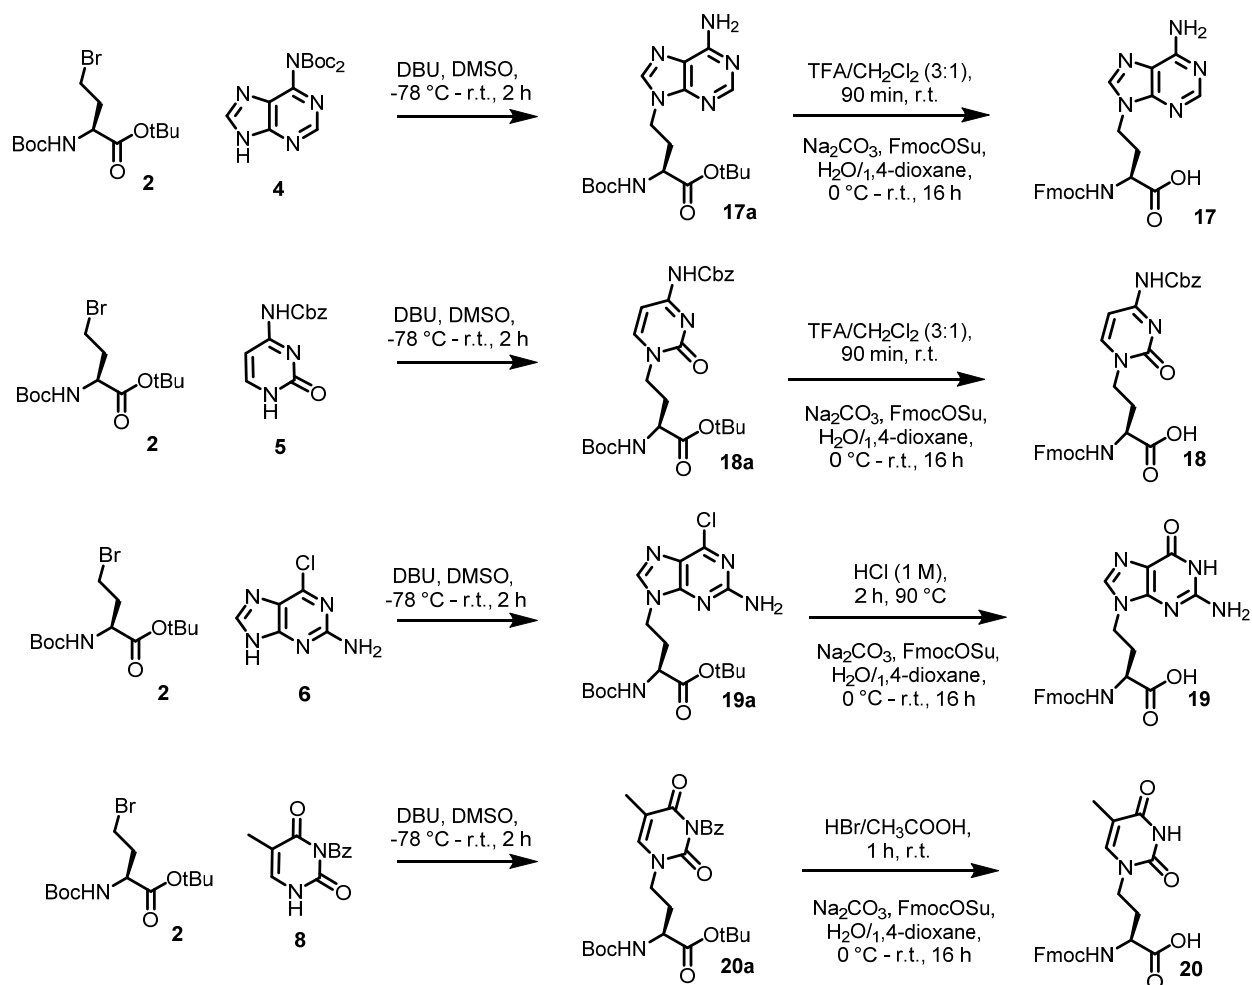

**SI Scheme 2. Synthesis of homoalanyl nucleobase monomers. Protecting group discussion:** Attempts to use adenine without any N6 protecting group produced both **17a** and its regioisomer (7-adeninyl; data not shown). The bis-Boc protection on N6 directs the nucleophilic substitution to the desired 9-adeninyl isomer. **17** could be used for SPPS without protecting on N6: no side reaction due to amide couplings on N6 were observed. While cytosine could be used without any N4 protecting group for the nucleophilic substitution step, during SPPS we observed side reaction due to amide couplings on N4. Prolonged acidic cleavages or permanence in aqueous conditions removed these secondary side chains, but to avoid inefficient SPPS, we used N4-Cbz protection. Unprotected thymidine afforded > 30% N3 regioisomer in the nucleophilic substitution. Benzoyl protection was used to generate pure **20a**.

## Synthesis procedures

### Synthesis of 6-N(Boc)<sub>2</sub>-adenine (**4**)

According to Dey et al., *J. Org. Chem.* 2000, 65, 7697

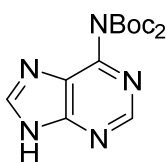

To a solution of adenine (2.70 g, 20.0 mmol) in THF (anhydrous, 100 mL) was added Boc anhydride (18.4 mL, 80 mmol) and 4-(Dimethylamino)pyridine (244 mg, 2.00 mmol). After 16 h stirring at room temperature the solvent was removed under reduced pressure and the mixture taken up in EtOAc (500 mL). The organic phase was washed with HCl (1 M, aq. sol., 100 mL) and NaCl (sat. aq. sol., 100 mL) and then dried under reduced pressure. The resulting slurry was redissolved in MeOH (200 mL), treated with NaHCO<sub>3</sub> (sat. aq. sol., 90 mL) and stirred for 1 h at 50 °C. The MeOH was then removed under reduced pressure, the solution diluted with H<sub>2</sub>O and extracted with CH<sub>2</sub>Cl<sub>2</sub> (3 x 100 mL). The organic phase was washed with HCl (1 M, aq. sol., 100 mL) and NaCl (sat. aq. sol., 100 mL) and then dried under reduced pressure affording the desired product as a colorless solid (4.00 g, 11.9 mmol, 60%).

<sup>1</sup>H NMR (400 MHz, DMSO-*d*<sub>6</sub>) δ 8.81 (s, 1H), 8.64 (s, 1H), 1.37 (s, 18H).

TLC *R*<sub>f</sub> (EtOAc) 0.59, visualized with UV light

### Synthesis of Nα-Boc-β-(6-N(Boc)<sub>2</sub>-9-adenilyl)alanine (**13a**)

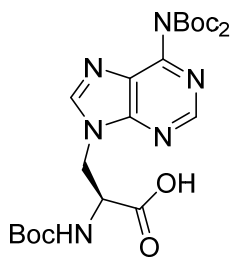

To a solution of **4** (3.00 g, 8.90 mmol) in DMSO (60 mL) was added DBU (1.23 g, 8 mmol) and stirred for 2 h at room temperature. The solution was then cooled to -78 °C and Boc-serinolactone (1.5 g, 8 mmol) dissolved in DMF (20 mL) was added dropwise. The reaction was allowed to warm up to room temperature and was stirred over-night. EtOAc (250 mL) was added to the solution and washed with aq. HCl (1 M, 3 x 50 mL). The organic layer was dried with Na<sub>2</sub>SO<sub>4</sub> and solvent removed under reduced pressure. Column chromatography over SiO<sub>2</sub> (hexanes/EtOAc = 1:1) afforded the product as a colorless solid (1.75 g, 3.35 mmol, 38%).

<sup>1</sup>H NMR (500 MHz, DMSO-*d*<sub>6</sub>) δ 13.09 (s, 1H), 8.85 (s, 1H), 8.49 (s, 1H), 7.39 – 7.30 (m, 1H), 4.71 (d, *J* = 9.0 Hz, 1H), 4.51 (t, *J* = 6.1 Hz, 2H), 1.37 (s, 27H).

<sup>13</sup>C NMR (126 MHz, DMSO-*d*<sub>6</sub>) δ 171.63, 162.77, 155.65, 153.70, 151.87, 150.45, 149.41, 147.52, 145.56, 128.12, 83.69, 83.59, 78.95, 53.12, 44.44, 36.25, 31.24, 28.47, 27.75.

### Synthesis of N $\alpha$ -Fmoc- $\beta$ -(9-adeninyl)alanine (**13**)

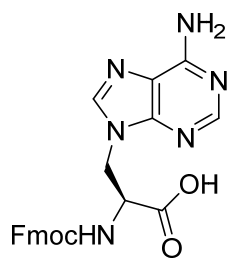

**13a** (1.75 g, 3.35 mmol) was dissolved in TFA/DCM (60 mL, 3:1) and stirred for 90 min at room temperature. The solvent was removed under reduced pressure and the mixture taken up in aq. Na<sub>2</sub>CO<sub>3</sub> (10%, 50 mL) and 1,4-dioxane (20 mL) and cooled to 0 °C. FmocOSu (1.30 g, 4.02 mmol) was dissolved in 1,4-dioxane (30 mL) and added dropwise to the mixture. The reaction was allowed to reach room temperature and was stirred overnight. H<sub>2</sub>O (100 mL) was added to the solution and washed with hexanes (3 x 50 mL). The aqueous phase was acidified with aq. HCl (6 M) until precipitation of a colorless solid was observed. The precipitate was filtered and washed with aq. HCl (1 M), affording the desired product as a colorless solid (800 mg, 1.80 mmol, 54% over two steps).

<sup>1</sup>H NMR (400 MHz, DMSO-*d*<sub>6</sub>)  $\delta$  13.25 (s, 1H), 8.46 (s, 2H), 8.35 (s, 1H), 8.25 (s, 1H), 7.90 (dd, *J* = 14.4, 7.8 Hz, 3H), 7.60 (dd, *J* = 12.6, 7.5 Hz, 2H), 7.41 (td, *J* = 7.5, 3.3 Hz, 2H), 7.36 – 7.27 (m, 2H), 4.69 – 4.62 (m, 1H), 4.57 – 4.44 (m, 2H), 4.29 – 4.12 (m, 3H).

<sup>13</sup>C NMR (101 MHz, DMSO-*d*<sub>6</sub>)  $\delta$  171.31, 156.30, 149.57, 144.14, 144.10, 143.56, 141.15, 128.12, 127.54, 125.60, 125.57, 120.59, 118.65, 66.25, 53.83, 46.95, 44.21.

HRMS (ESI-QToF) *m/z*: [M+H]<sup>+</sup> calcd 445.1546, found 445.1791.

### Synthesis of N $\alpha$ -Boc-(N4-Cbz-1-cytosinyl)alanine (14a)

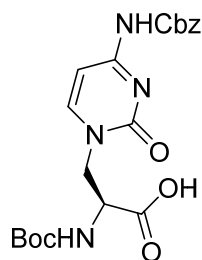

To a solution of Cbz-Cytosine (3.5 g, 14.3 mmol) in DMSO (30 mL) was added DBU (2.2 g, 14.3 mmol). The solution was stirred for 20 min at RT before adding dropwise a solution of Boc-serinolactone (3.2 g, 17.1 mmol) in DMSO (10 mL). After 3 h stirring, EtOAc (250 mL) was added to the solution and washed with aq. HCl (1 M, 3 x 50 mL). The organic layer was dried with Na<sub>2</sub>SO<sub>4</sub> and solvent removed under reduced pressure. Column chromatography over SiO<sub>2</sub> (CH<sub>2</sub>Cl<sub>2</sub> + 5% MeOH) afforded the product as a colorless solid (2.4 g, 5.6 mmol, 39%).

<sup>1</sup>H NMR (500 MHz, DMSO-*d*<sub>6</sub>) δ 7.85 (d, *J* = 7.4 Hz, 1H), 7.46 – 7.29 (m, 6H), 7.12 (d, *J* = 8.6 Hz, 1H), 6.97 (d, *J* = 7.6 Hz, 1H), 5.21 – 5.17 (m, 2H), 4.42 – 4.33 (m, 2H), 3.71 – 3.61 (m, 1H), 1.32 (d, *J* = 3.6 Hz, 9H).

HRMS (ESI-QToF) *m/z*: [M+H]<sup>+</sup> calcd 433.1723, found 433.1732.

### Synthesis of N $\alpha$ -Fmoc-(N4-Cbz-1-cytosinyl)alanine (14)

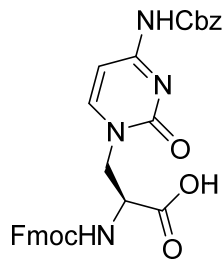

**14a** (2.4 g, 5.6 mmol) was dissolved in TFA/DCM (60 mL, 3:1) and stirred for 90 min at room temperature. The solvent was removed under reduced pressure and the mixture taken up in aq. Na<sub>2</sub>CO<sub>3</sub> (10%, 50 mL) and 1,4-dioxane (20 mL) and cooled to 0 °C. FmocOSu (2.00 g, 5.9 mmol) was dissolved in 1,4-dioxane (30 mL) and added dropwise to the mixture. The reaction was allowed to reach room temperature and was stirred overnight. H<sub>2</sub>O (100 mL) was added to the solution and washed with hexanes (3 x 50 mL). The aqueous phase was acidified with aq. HCl (6 M) until precipitation of a colorless solid was observed. The precipitate was filtered and washed with aq. HCl (1 M). The precipitate was the desired product (1.9 g, 3.4 mmol, 61%).

<sup>1</sup>H NMR (400 MHz, DMSO-*d*<sub>6</sub>) δ 10.81 (s, 1H), 7.94 – 7.75 (m, 4H), 7.63 (t, *J* = 7.5 Hz, 2H), 7.48 – 7.26 (m, 9H), 6.94 (d, *J* = 7.3 Hz, 1H), 5.24 – 5.14 (m, 2H), 4.49 – 4.36 (m, 2H), 4.35 – 4.17 (m, 3H), 3.84 – 3.70 (m, 1H).

<sup>13</sup>C NMR (101 MHz, DMSO-*d*<sub>6</sub>) δ 171.66, 163.48, 156.44, 144.21, 144.13, 141.19, 136.43, 128.95, 128.64, 128.44, 128.40, 128.10, 127.51, 125.58, 120.58, 66.96, 66.17, 52.07, 47.02.

HRMS (ESI-QToF) *m/z*: [M+H]<sup>+</sup> calcd 555.1880, found 555.1880.



### Synthesis of N $\alpha$ -Boc- $\beta$ -(2-amino-6-chloro-9-purinyl)alanine (**15a**)

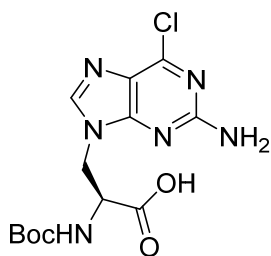

To a solution of 6-chloropurine (3.77 g, 22.3 mmol) in DMSO (40 mL) was added DBU (4.06 g, 26.6 mmol). The solution was stirred for 20 min at RT before adding dropwise a solution of Boc-serinolactone (5.0 g, 26.7 mmol) in DMSO (30 mL). After 2 h stirring, EtOAc (250 mL) was added to the solution and washed with aq. HCl (1 M, 3 x 50 mL). The organic layer was dried with Na<sub>2</sub>SO<sub>4</sub> and solvent removed under reduced pressure. Column chromatography over SiO<sub>2</sub> (CH<sub>2</sub>Cl<sub>2</sub> + 10% MeOH) afforded the product as a colorless solid (5.0 g, 14.0 mmol, 63%).

<sup>1</sup>H NMR (400 MHz, DMSO-*d*<sub>6</sub>)  $\delta$  13.10 (s, 1H), 7.94 (s, 1H), 7.29 (d, *J* = 8.6 Hz, 1H), 6.95 (s, 2H), 4.50 – 4.35 (m, 2H), 4.22 (dd, *J* = 13.5, 9.8 Hz, 1H), 1.29 (s, 9H).

<sup>13</sup>C NMR (101 MHz, DMSO-*d*<sub>6</sub>)  $\delta$  171.70, 160.27, 155.70, 154.60, 149.75, 143.89, 123.71, 79.02, 52.88, 43.94, 40.90, 28.47, 27.97.

HRMS (SI-QToF) *m/z*: [M+H]<sup>+</sup> calcd 357.1078, found 357.1077.

### Synthesis of N $\alpha$ -Fmoc- $\beta$ -(9-guaninyl)alanine (**15**)

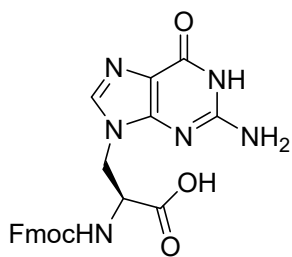

**15a** (5.0 g, 14.0 mmol) was dissolved in TFA/H<sub>2</sub>O (80 mL, 3:1) and stirred for 72 h at room temperature. The solvent was removed under reduced pressure and the mixture taken up in aq. Na<sub>2</sub>CO<sub>3</sub> (10%, 50 mL) and 1,4-dioxane (20 mL) and cooled to 0 °C. FmocOSu (5.7 g, 16.8 mmol) was dissolved in 1,4-dioxane (30 mL) and added dropwise to the mixture. The reaction was allowed to reach room temperature and was stirred overnight. H<sub>2</sub>O (100 mL) was added to the solution and washed with hexanes (3 x 50 mL). The aqueous phase was acidified

with aq. HCl (6 M) until precipitation of a colorless solid was observed. The precipitate was triturated with hexanes/CH<sub>2</sub>Cl<sub>2</sub> (1:1), centrifuged and collected, affording the desired product (4.8 g, 10.4 mmol, 74%).

<sup>1</sup>H NMR (400 MHz, DMSO-*d*<sub>6</sub>)  $\delta$  13.19 (s, 1H), 10.84 (s, 1H), 7.89 (d, *J* = 7.7 Hz, 4H), 7.63 (dd, *J* = 15.6, 7.5 Hz, 2H), 7.45 – 7.39 (m, 2H), 7.37 – 7.27 (m, 2H), 6.70 (s, 2H), 4.49 – 4.37 (m, 2H), 4.34 – 4.14 (m, 4H).

<sup>13</sup>C NMR (101 MHz, DMSO-*d*<sub>6</sub>)  $\delta$  171.70, 160.27, 155.70, 154.60, 149.75, 143.89, 123.71, 79.02, 52.88, 43.94, 40.90, 28.47, 27.97.

HRMS (SI-QToF) *m/z*: [M+H]<sup>+</sup> calcd 461.1573, found 461.1620.

### Synthesis of N $\alpha$ -Boc- $\beta$ -(1-thyminy)alanine (**16a**)

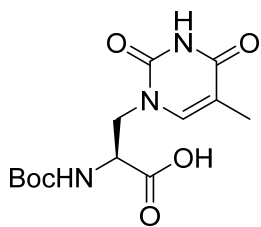

To a solution of Thymidine (2.81 g, 22.3 mmol) in DMSO (40 mL) was added DBU (4.06 g, 26.6 mmol). The solution was stirred for 20 min at RT before adding dropwise a solution of Boc-serinolactone (5.0 g, 26.7 mmol) in DMSO (30 mL). After 2 h stirring, EtOAc (250 mL) was added to the solution and washed with aq. HCl (1 M, 3 x 50 mL). The organic layer was dried with Na<sub>2</sub>SO<sub>4</sub> and solvent removed under reduced pressure. Column chromatography over SiO<sub>2</sub> (CH<sub>2</sub>Cl<sub>2</sub> + 5% MeOH) afforded the product as a colorless solid (2.0 g, 6.4.0 mmol, 29%).

<sup>1</sup>H NMR (500 MHz, DMSO-*d*<sub>6</sub>)  $\delta$  12.97 (s, 1H), 11.25 (s, 1H), 7.32 (s, 1H), 7.14 (d, *J* = 8.9 Hz, 1H), 4.37 – 4.28 (m, 1H), 4.21 (dd, *J* = 13.7, 4.8 Hz, 1H), 3.55 (dd, *J* = 13.7, 10.2 Hz, 1H), 1.73 (s, 3H), 1.33 (s, 9H).

<sup>13</sup>C NMR (126 MHz, DMSO-*d*<sub>6</sub>)  $\delta$  171.76, 164.76, 155.76, 151.33, 142.42, 138.18, 108.25, 78.93, 51.92, 49.03, 40.90, 28.55, 28.49, 28.19, 12.48, 12.27.

HRMS (SI-QToF) *m/z*: [M+H]<sup>+</sup> calcd. 314.1352, found 314.1339.

### Synthesis of N $\alpha$ -Fmoc- $\beta$ -(1-thyminy)alanine (**16**)

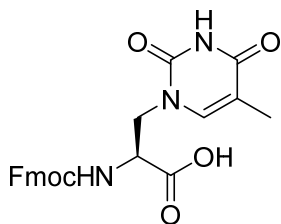

**16a** (2.0 g, 6.4 mmol) was dissolved in TFA/DCM (60 mL, 3:1) and stirred for 90 min at room temperature. The solvent was removed under reduced pressure and the mixture taken up in aq. Na<sub>2</sub>CO<sub>3</sub> (10%, 50 mL) and 1,4-dioxane (20 mL) and cooled to 0 °C. FmocOSu (2.6 g, 7.7 mmol) was dissolved in 1,4-dioxane (30 mL) and added dropwise to the mixture. The reaction was allowed to reach room temperature and was stirred overnight. H<sub>2</sub>O (100 mL) was added to the solution and washed with hexanes (3 x 50 mL). The aqueous phase was acidified with aq. HCl (6 M) until precipitation of a colorless solid was observed. The precipitate was filtered and washed with aq. HCl (1 M). The precipitate was the desired product (1.75 g, 4.0 mmol, 63%).

<sup>1</sup>H NMR (500 MHz, DMSO-*d*<sub>6</sub>)  $\delta$  13.09 (s, 1H), 11.29 (s, 1H), 7.89 (s, 2H), 7.78 (d, *J* = 8.9 Hz, 1H), 7.70 – 7.63 (m, 2H), 7.45 – 7.40 (m, 2H), 7.38 – 7.36 (m, 1H), 7.35 – 7.30 (m, 2H), 4.42 – 4.34 (m, 1H), 4.30 – 4.15 (m, 5H), 3.63 (dd, *J* = 13.8, 10.0 Hz, 1H), 1.61 (s, 3H).

<sup>13</sup>C NMR (126 MHz, DMSO-*d*<sub>6</sub>)  $\delta$  171.63, 164.74, 156.48, 151.33, 144.22, 144.08, 142.35, 141.18, 141.15, 128.14, 127.55, 127.53, 125.62, 120.62, 120.60, 108.42, 66.37, 52.56, 48.74, 47.00, 25.75, 12.38.

HRMS (SI-QToF) *m/z*: [M+H]<sup>+</sup> calcd. 436.1509, found 436.1545.

### Synthesis of N $\alpha$ -Boc- $\gamma$ -(6-N(Boc)<sub>2</sub>-9-adenilyl)alanine-OtBu (17a)

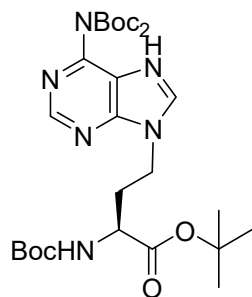

**2** (1.5 g, 4.4 mmol), bisBoc-adenine (1.85 g, 5.5 mmol), K<sub>2</sub>CO<sub>3</sub> (607 mg, 4.4 mmol), Cs<sub>2</sub>CO<sub>3</sub> (1.4 g, 4.4 mmol) and tetrabutylammonium iodide (162 mg, 0.44 mmol) were suspended in DMF (45 mL) and stirred at 50 °C for 16 h. EtOAc (300 mL) was added to the suspension and washed with aq. HCl (1 M, 2 x 100 mL) and NaCl (sat. aq. sol., 50 mL). Automated reversed phase column chromatography afforded the desired product as a colorless solid (1.5 g, 2.5 mmol, 58%).

<sup>1</sup>H NMR (500 MHz, DMSO-*d*<sub>6</sub>)  $\delta$  8.84 (s, 1H), 8.57 (s, 1H), 7.36 (d, *J* = 7.9 Hz, 1H), 4.46 – 4.28 (m, 2H), 3.77 – 3.68 (m, 1H), 2.42 – 2.33 (m, 1H), 2.17 – 2.07 (m, 1H), 1.43 – 1.34 (m, 27H).

<sup>13</sup>C NMR (126 MHz, DMSO-*d*<sub>6</sub>)  $\delta$  171.41, 155.94, 153.57, 151.86, 150.50, 149.50, 147.28, 128.24, 83.74, 81.16, 78.81, 52.17, 41.21, 30.76, 28.64, 28.35, 28.01, 27.76.

HRMS (SI-QToF) *m/z*: [M+H]<sup>+</sup> calcd. 593.3299, found 593.3199.

### Synthesis of N $\alpha$ -Fmoc- $\gamma$ -(9-adenilyl)alanine (17)

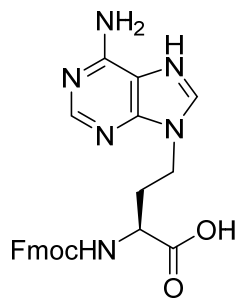

**17a** (1.59 g, 2.7 mmol) was dissolved in TFA/DCM (60 mL, 3:1) and stirred for 90 min at room temperature. The solvent was removed under reduced pressure and the mixture taken up in aq. Na<sub>2</sub>CO<sub>3</sub> (10%, 50 mL) and 1,4-dioxane (20 mL) and cooled to 0 °C. FmocOSu (1.1 g, 3.24 mmol) was dissolved in 1,4-dioxane (30 mL) and added dropwise to the mixture. The reaction was allowed to reach room temperature and was stirred overnight. H<sub>2</sub>O (100 mL) was added to the solution and washed with hexanes (3 x 50 mL). The aqueous phase was acidified with aq. HCl (6 M) until precipitation of a colorless solid was observed. The precipitate was filtered and washed with aq. HCl (1 M) affording the desired product (900 mg, 1.96 mmol, 73%) as a colorless solid.

<sup>1</sup>H NMR (500 MHz, DMSO-*d*<sub>6</sub>)  $\delta$  8.40 (d, *J* = 21.8 Hz, 2H), 7.95 – 7.72 (m, 5H), 7.47 – 7.33 (m, 4H), 4.41 – 4.22 (m, 5H), 3.97 – 3.86 (m, 1H), 2.47 – 2.33 (m, 1H), 2.24 – 2.11 (m, 1H).

<sup>13</sup>C NMR (126 MHz, DMSO-*d*<sub>6</sub>)  $\delta$  173.45, 156.61, 149.24, 144.29, 144.26, 143.74, 141.22, 128.14, 127.58, 125.77, 125.74, 120.63, 118.62, 66.17, 51.69, 47.13, 41.27, 31.06.

HRMS (SI-QToF) *m/z*: [M+H]<sup>+</sup> calcd. 459.1781, found 459.1855.

### Synthesis of N $\alpha$ -Boc- $\gamma$ -(4-N(Cbz)-1-cytosinyl)alanine-OtBu (18a)

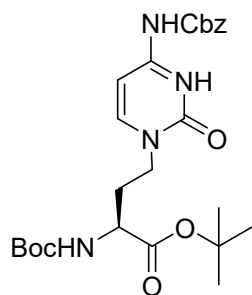

**2** (1.0 g, 2.95 mmol), Cbz-cytosine (0.98 g, 2.95 mmol), K<sub>2</sub>CO<sub>3</sub> (414 mg, 2.95 mmol), Cs<sub>2</sub>CO<sub>3</sub> (828 mg, 2.95 mmol) and tetrabutylammonium iodide (111 mg, 0.295 mmol) were suspended in DMF (25 mL) and stirred at 50 °C for 16 h. EtOAc (300 mL) was added to the suspension and washed with aq. HCl (1M, 2 x 100 mL) and NaCl (sat. aq. sol., 50 mL). Automated reversed phase column chromatography afforded the desired product as a colorless solid (0.89 g, 1.77 mmol, 60%).

<sup>1</sup>H NMR (400 MHz, DMSO-*d*<sub>6</sub>)  $\delta$  10.75 (s, 0H), 7.97 (d, *J* = 7.3 Hz, 1H), 7.47 – 7.32 (m, 5H), 7.27 (d, *J* = 7.8 Hz, 1H), 6.98 (d, *J* = 7.3 Hz, 1H), 5.19 (s, 2H), 3.91 – 3.73 (m, 3H), 2.13 – 1.99 (m, 1H), 1.93 – 1.77 (m, 1H), 1.43 – 1.34 (m, 18H).

<sup>13</sup>C NMR (101 MHz, DMSO-*d*<sub>6</sub>)  $\delta$  171.51, 163.25, 155.92, 155.29, 153.68, 150.37, 136.45, 128.94, 128.61, 128.38, 94.49, 81.11, 78.77, 66.91, 52.51, 47.37, 29.90, 28.63, 28.37, 28.04.

HRMS (SI-QToF) *m/z*: [M+H]<sup>+</sup> calcd. 503.2506, found 503.2769.

### Synthesis of N $\alpha$ -Fmoc- $\gamma$ -(4-N(Cbz)-1-cytosinyl)alanine (18)

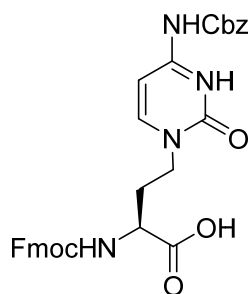

**18a** (1.26 g, 2.5 mmol) was dissolved in TFA/DCM (60 mL, 3:1) and stirred for 90 min at room temperature. The solvent was removed under reduced pressure and the mixture taken up in aq. Na<sub>2</sub>CO<sub>3</sub> (10%, 50 mL) and 1,4-dioxane (20 mL) and cooled to 0 °C. FmocOSu (0.93 g, 2.75 mmol) was dissolved in 1,4-dioxane (30 mL) and added dropwise to the mixture. The reaction was allowed to reach room temperature and was stirred overnight. H<sub>2</sub>O (100 mL) was added to the solution and washed with hexanes (3 x 50 mL). The aqueous phase was acidified with aq. HCl (6 M) until precipitation of a colorless solid was observed. The precipitate was

filtered and washed with aq. HCl (1 M). The precipitate was the desired product (630 mg, 1.05 mmol, 42%).

<sup>1</sup>H NMR (400 MHz, DMSO-*d*<sub>6</sub>)  $\delta$  7.99 – 7.85 (m, 4H), 7.77 – 7.69 (m, 3H), 7.48 – 7.32 (m, 10H), 6.98 (d, *J* = 7.2 Hz, 1H), 5.18 (s, 2H), 4.83 (d, *J* = 6.1 Hz, 1H), 4.45 – 4.19 (m, 3H), 4.00 – 3.91 (m, 1H), 3.91 – 3.78 (m, 2H), 2.24 – 2.11 (m, 1H), 2.01 – 1.89 (m, 1H).

<sup>13</sup>C NMR (101 MHz, DMSO-*d*<sub>6</sub>)  $\delta$  173.62, 170.17, 163.22, 156.60, 155.27, 153.66, 151.58, 150.42, 144.28, 143.10, 141.30, 141.21, 136.42, 128.94, 128.61, 128.43, 128.40, 128.12, 127.77, 127.57, 127.55, 125.75, 125.69, 125.37, 120.77, 120.61, 120.58, 94.46, 72.34, 66.94, 66.13, 51.93, 47.54, 47.14, 46.43, 30.02, 25.75.

HRMS (SI-QToF) *m/z*: [M+H]<sup>+</sup> calcd. 596.2036, found 596.2147.

### Synthesis of N $\alpha$ -Boc- $\gamma$ -(2-amino-6-chloro-9-purinyloxy)alanine-OtBu (19a)

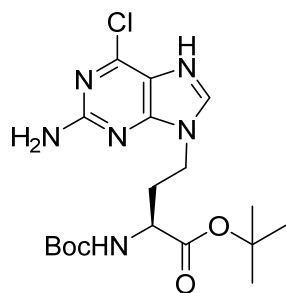

**2** (1.5 g, 4.4 mmol), 6-chloropurine (935 mg, 5.5 mmol), K<sub>2</sub>CO<sub>3</sub> (607 mg, 4.4 mmol), Cs<sub>2</sub>CO<sub>3</sub> (1.4 g, 4.4 mmol) and tetrabutylammonium iodide (162 mg, 0.44 mmol) were suspended in DMF (45 mL) and stirred at 50 °C for 16 h. EtOAc (300 mL) was added to the suspension and washed with aq. HCl (1 M, 2 x 100 mL) and NaCl (sat. aq. sol., 50 mL). Automated reversed phase column chromatography afforded the desired product as a colorless solid (1.32 g, 3.08 mmol, 70%).

**<sup>1</sup>H NMR** (500 MHz, DMSO-*d*<sub>6</sub>)  $\delta$  8.04 (s, 1H), 7.32 (d, *J* = 7.9 Hz, 1H), 6.95 (d, *J* = 7.6 Hz, 2H), 4.11 (t, *J* = 7.1 Hz, 2H), 3.80 – 3.69 (m, 1H), 2.34 – 2.21 (m, 1H), 2.09 – 1.97 (m, 1H), 1.38 (d, *J* = 20.0 Hz, 18H).

**<sup>13</sup>C NMR** (126 MHz, DMSO-*d*<sub>6</sub>)  $\delta$  171.45, 160.22, 155.96, 154.52, 149.78, 143.60, 123.79, 81.17, 78.84, 52.37, 40.76, 30.44, 28.63, 28.34, 28.02.

**HRMS** (SI-QToF) *m/z*: [M+H]<sup>+</sup> calcd. 427.1861, found 427.1785.

### Synthesis of N $\alpha$ -Fmoc- $\gamma$ -(9-guaninyloxy)alanine (19)

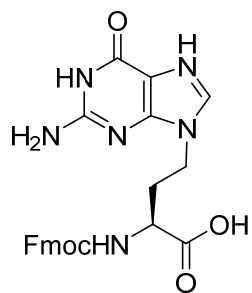

**19a** (1.3 g, 3.0 mmol) was dissolved in aq. HCl (1 M, 30 mL) and stirred for 2 h at 90 °C. The solvent was removed under reduced pressure and the mixture taken up in aq. Na<sub>2</sub>CO<sub>3</sub> (10%, 50 mL) and 1,4-dioxane (20 mL) and cooled to 0 °C. FmocOSu (1.2 g, 3.6 mmol) was dissolved in 1,4-dioxane (30 mL) and added dropwise to the mixture. The reaction was allowed to reach room temperature and was stirred overnight. H<sub>2</sub>O (100 mL) was added to the solution and washed with hexanes (3 x 50 mL). The aqueous phase was acidified with aq. HCl (6 M) until precipitation of a colorless solid was observed. The precipitate was triturated with hexanes/CH<sub>2</sub>Cl<sub>2</sub> (1:1), centrifuged and collected, affording the desired product (600 mg, 1.26 mmol, 42%).

**<sup>1</sup>H NMR** (500 MHz, DMSO-*d*<sub>6</sub>)  $\delta$  12.82 (s, 1H), 11.40 (s, 1H), 8.55 (s, 1H), 7.91 (d, *J* = 7.5 Hz, 2H), 7.82 (d, *J* = 8.3 Hz, 1H), 7.74 (dd, *J* = 7.5, 2.9 Hz, 2H), 7.48 – 7.39 (m, 2H), 7.39 – 7.28 (m, 2H), 7.07 (s, 2H), 4.35 – 4.30 (m, 2H), 4.26 (t, *J* = 7.0 Hz, 1H), 4.16 – 4.10 (m, 2H), 4.01 – 3.95 (m, 1H), 2.41 – 2.31 (m, 1H), 2.17 – 2.06 (m, 1H).

**<sup>13</sup>C NMR** (126 MHz, DMSO-*d*<sub>6</sub>)  $\delta$  173.40, 156.61, 155.37, 150.73, 144.31, 144.22, 141.21, 137.63, 128.15, 127.58, 125.75, 120.63, 66.22, 51.73, 47.11, 41.74, 30.47.

**HRMS** (SI-QToF) *m/z*: [M+H]<sup>+</sup> calcd. 475.1730, found 475.1770.

### Synthesis of $\alpha$ -Boc- $\gamma$ -(3-(Bz)-1-thyminy)alanine-OtBu (20a)

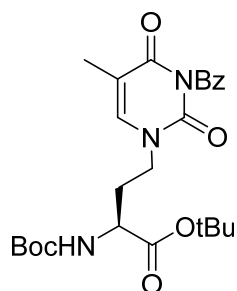

**2** (1.5 g, 4.4 mmol), benzoyl-thymidine (1.27 g, 5.5 mmol),  $K_2CO_3$  (607 mg, 4.4 mmol),  $Cs_2CO_3$  (1.4 g, 4.4 mmol) and tetrabutylammonium iodide (162 mg, 0.44 mmol) were suspended in DMF (45 mL) and stirred at 50 °C for 16 h. EtOAc (300 mL) was added to the suspension and washed with aq. HCl (1M, 2 x 100 mL) and NaCl (sat. aq. sol., 50 mL). Automated reversed phase column chromatography afforded the desired product as a colorless solid (1.80 g, 3.52 mmol, 80%).

**HRMS** (SI-QToF)  $m/z$ :  $[M+Na]^+$  calcd. 510.2216, found 510.1931.

### Synthesis of $\alpha$ -Fmoc- $\gamma$ -(1-thyminy)alanine (20)

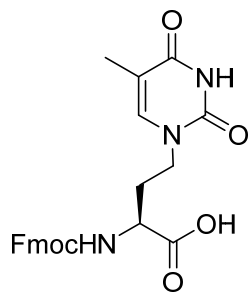

**20a** (1.66 g, 3.5 mmol) was dissolved in HBr (30% in AcOH, 25 mL) and stirred for 1 h, at room temperature. The solvent was removed under reduced pressure and the mixture taken up in aq.  $Na_2CO_3$  (10%, 50 mL) and 1,4-dioxane (20 mL) and cooled to 0 °C. FmocOSu (1.4 g, 4.2 mmol) was dissolved in 1,4-dioxane (30 mL) and added dropwise to the mixture. The reaction was allowed to reach room temperature and was stirred overnight.  $H_2O$  (100 mL) was added to the solution and washed with hexanes (3 x 50 mL). The aqueous phase was acidified with aq. HCl (6 M) until precipitation of a colorless solid was observed. The precipitate was triturated with hexanes/ $CH_2Cl_2$  (1:1), centrifuged and collected, affording the desired product (1.1 g, 2.4 mmol, 70%).

**$^1H$  NMR** (500 MHz,  $DMSO-d_6$ )  $\delta$  12.74 (s, 1H), 11.24 (s, 1H), 7.91 (d,  $J = 7.5$  Hz, 2H), 7.74 (dd,  $J = 8.3, 2.6$  Hz, 2H), 7.48 – 7.39 (m, 3H), 7.35 (td,  $J = 7.4, 4.4$  Hz, 2H), 4.37 – 4.23 (m, 3H), 3.97 (m, 1H), 3.76 – 3.64 (m, 2H), 2.09 (m, 1H), 1.96 – 1.85 (m, 1H), 1.73 (s, 3H).

**$^{13}C$  NMR** (126 MHz,  $DMSO-d_6$ )  $\delta$  173.66, 164.75, 156.57, 151.31, 144.28, 141.84, 141.21, 128.14, 127.59, 125.76, 125.71, 120.63, 120.61, 108.93, 66.17, 51.88, 47.14, 45.14, 30.27, 12.43.

**HRMS** (SI-QToF)  $m/z$ :  $[M+Na]^+$  calcd. 450.1665, found 450.1665.

### N $\alpha$ -Fmoc-N $\gamma$ -(6(Bhoc)-9-adenilylacetyl)-diaminobutyric acid (21)

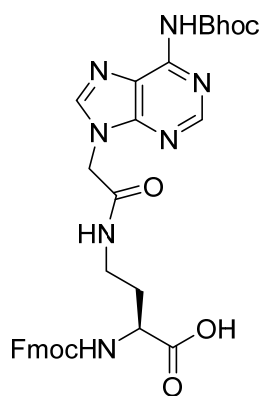

To a solution of Bhoc-Adenine-acetic acid (1.6 g, 4 mmol) in DMF (20 mL) were added TSTU (4 mmol, 1.2 g), and DIEA (16 mmol, 700  $\mu$ L). The solution was stirred for 15 min at room temperature before adding Fmoc-Dap-OH (1.53 g, 4 mmol). After 2 h stirring at room temperature the solvent was removed under reduced pressure and reversed phase column chromatography (120 g C18, 35-100% MeCN in H<sub>2</sub>O over 40 min) afforded the desired product as a colorless solid (800 mg, 1.1 mmol, 28 %).

<sup>1</sup>H NMR (400 MHz, DMSO-*d*<sub>6</sub>)  $\delta$  12.68 (s, 1H), 10.90 (s, 1H), 8.59 (s, 1H), 8.40 (s, 1H), 7.89 (d, *J* = 7.5 Hz, 2H), 7.76 – 7.67 (m, 3H), 7.54 (d, *J* = 7.2 Hz, 4H), 7.43 – 7.28 (m, 14H), 6.83 (s, 1H), 4.32 – 4.18 (m, 3H), 3.23 – 3.14 (m, 2H), 1.99 – 1.88 (m, 1H), 1.85 – 1.71 (m, 1H).

<sup>13</sup>C NMR (101 MHz, DMSO-*d*<sub>6</sub>)  $\delta$  174.12, 166.43, 156.62, 152.55, 151.86, 151.68, 149.49, 145.75, 144.29, 144.26, 141.31, 141.17, 129.29, 128.95, 128.51, 128.19, 128.10, 127.55, 127.15, 127.06, 126.96, 126.68, 125.77, 125.73, 122.61, 120.58, 77.80, 74.70, 66.13, 52.10, 47.09, 45.70, 36.49, 30.83.

HRMS (SI-QToF) *m/z*: [M+H]<sup>+</sup> calcd. 726.2676, found 726.2683.

### N $\alpha$ -Fmoc-N $\gamma$ -(4(Bhoc)-1-cytosinylacetyl)-diaminobutyric acid (22)

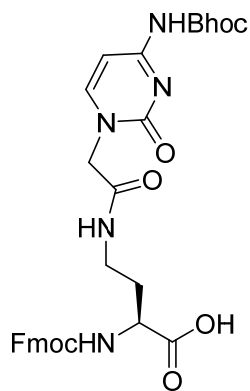

To a solution of Bhoc-C-acetic acid (1.5 g, 4 mmol) in DMF (20 mL) were added TSTU (4 mmol, 1.2 g), and DIEA (16 mmol, 700  $\mu$ L). The solution was stirred for 15 min at room temperature before adding Fmoc-Dap-OH (1.53 g, 4 mmol). After 2 h stirring at room temperature the solvent was removed under reduced pressure and reversed phase column chromatography (120 g C18, 35-100% MeCN in H<sub>2</sub>O over 40 min) afforded the desired product as a colorless solid (610 mg, 0.87 mmol, 22%).

<sup>1</sup>H NMR (400 MHz, DMSO-*d*<sub>6</sub>)  $\delta$  12.65 (s, 1H), 10.96 (s, 1H), 8.24 (t, *J* = 5.4 Hz, 1H), 7.95 (d, *J* = 7.3 Hz, 1H), 7.89 (d, *J* = 7.5 Hz, 2H), 7.77 – 7.65 (m, 3H), 7.50 – 7.29 (m, 16H), 6.93 (d, *J* = 7.3 Hz, 1H), 6.80 (s, 1H), 4.35 – 4.19 (m, 3H), 4.02 (dq, *J* = 9.4, 6.2, 4.7 Hz, 1H), 3.25 – 3.08 (m, 2H), 1.96 – 1.86 (m, 1H), 1.85 – 1.70 (m, 1H).

<sup>13</sup>C NMR (101 MHz, DMSO-*d*<sub>6</sub>)  $\delta$  174.09, 167.05, 163.47, 156.60, 144.26, 141.17, 140.87, 129.06, 129.02, 128.31, 128.10, 127.56, 126.90, 125.74, 120.57, 94.07, 77.87, 66.15, 55.38, 52.18, 51.78, 47.09, 36.42, 31.16.

HRMS (SI-QToF) *m/z*: [M+H]<sup>+</sup> calcd. 702.2564, found 702.2492.

### N $\alpha$ -Fmoc-N $\gamma$ -(4(Bhoc)-9-guanidylacetyl)-diaminobutyric acid (23)

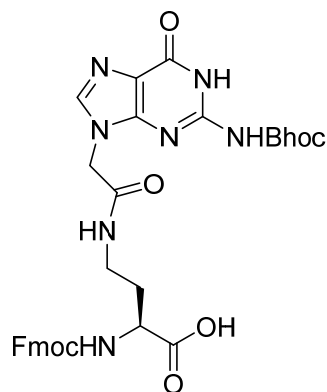

1H), 1.83 – 1.71 (m, 1H).

To a solution of Bhoc-G-acetic acid (1.7 g, 4 mmol) in DMF (20 mL) were added TSTU (4 mmol, 1.2 g), and DIEA (16 mmol, 700  $\mu$ L). The solution was stirred for 15 min at room temperature before adding Fmoc-Dap-OH (1.53 g, 4 mmol). After 2 h stirring at room temperature the solvent was removed under reduced pressure and reversed phase column chromatography (120 g C18, 35-100% MeCN in H<sub>2</sub>O over 40 min) afforded the desired product as a colorless solid (750 mg, 1.0 mmol, 25%).

<sup>1</sup>H NMR (400 MHz, DMSO-*d*<sub>6</sub>)  $\delta$  11.23 (s, 1H), 8.36 – 8.27 (m, 1H), 7.96 (s, 1H), 7.93 – 7.87 (m, 3H), 7.76 – 7.67 (m, 3H), 7.49 – 7.29 (m, 14H), 6.86 (s, 1H), 4.32 – 4.19 (m, 3H), 4.08 – 3.99 (m, 1H), 3.63 – 3.53 (m, 1H), 3.24 – 3.05 (m, 3H), 2.01 – 1.88 (m,

<sup>13</sup>C NMR (101 MHz, DMSO-*d*<sub>6</sub>)  $\delta$  174.13, 166.44, 156.70, 155.40, 154.16, 149.66, 147.61, 144.26, 141.18, 141.08, 140.47, 129.05, 128.51, 128.44, 128.12, 127.56, 127.14, 127.00, 126.90, 126.88, 126.68, 125.74, 120.59, 119.38, 78.51, 66.17, 52.07, 47.08, 45.72, 36.47, 30.81.

HRMS (SI-QToF) *m/z*: [M+H]<sup>+</sup> calcd. 742.2625, found 742.2654.

### N $\alpha$ -Fmoc-N $\gamma$ -(thymidylacetyl)-diaminobutyric acid (24)

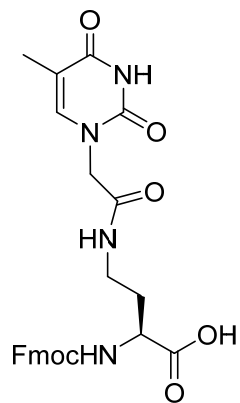

To a solution of T-acetic acid (736 mg, 4 mmol) in DMF (20 mL) were added TSTU (4 mmol, 1.2 g), and DIEA (16 mmol, 700  $\mu$ L). The solution was stirred for 15 min at room temperature before adding Fmoc-Dap-OH (1.53 g, 4 mmol). After 2 h stirring at room temperature the solvent was removed under reduced pressure and reversed phase column chromatography (120 g C18, 35-100% MeCN in H<sub>2</sub>O over 40 min) afforded the desired product as a colorless solid (550 mg, 1.1 mmol, 28%).

<sup>1</sup>H NMR (400 MHz, DMSO-*d*<sub>6</sub>)  $\delta$  12.68 (s, 1H), 11.26 (s, 1H), 8.18 (t, *J* = 5.5 Hz, 1H), 8.01 – 7.84 (m, 3H), 7.79 – 7.62 (m, 3H), 7.49 – 7.38 (m, 3H), 7.37 – 7.29 (m, 2H), 4.35 – 4.20 (m, 5H), 4.07 – 3.95 (m, 1H), 3.22 – 3.11 (m, 2H), 1.98 – 1.86 (m, 1H), 1.81 – 1.70 (m, 4H).

HRMS (SI-QToF) *m/z*: [M+H]<sup>+</sup> calcd. 507.1880, found 507.1875.



# NMR spectra

## <sup>1</sup>H NMR (4)

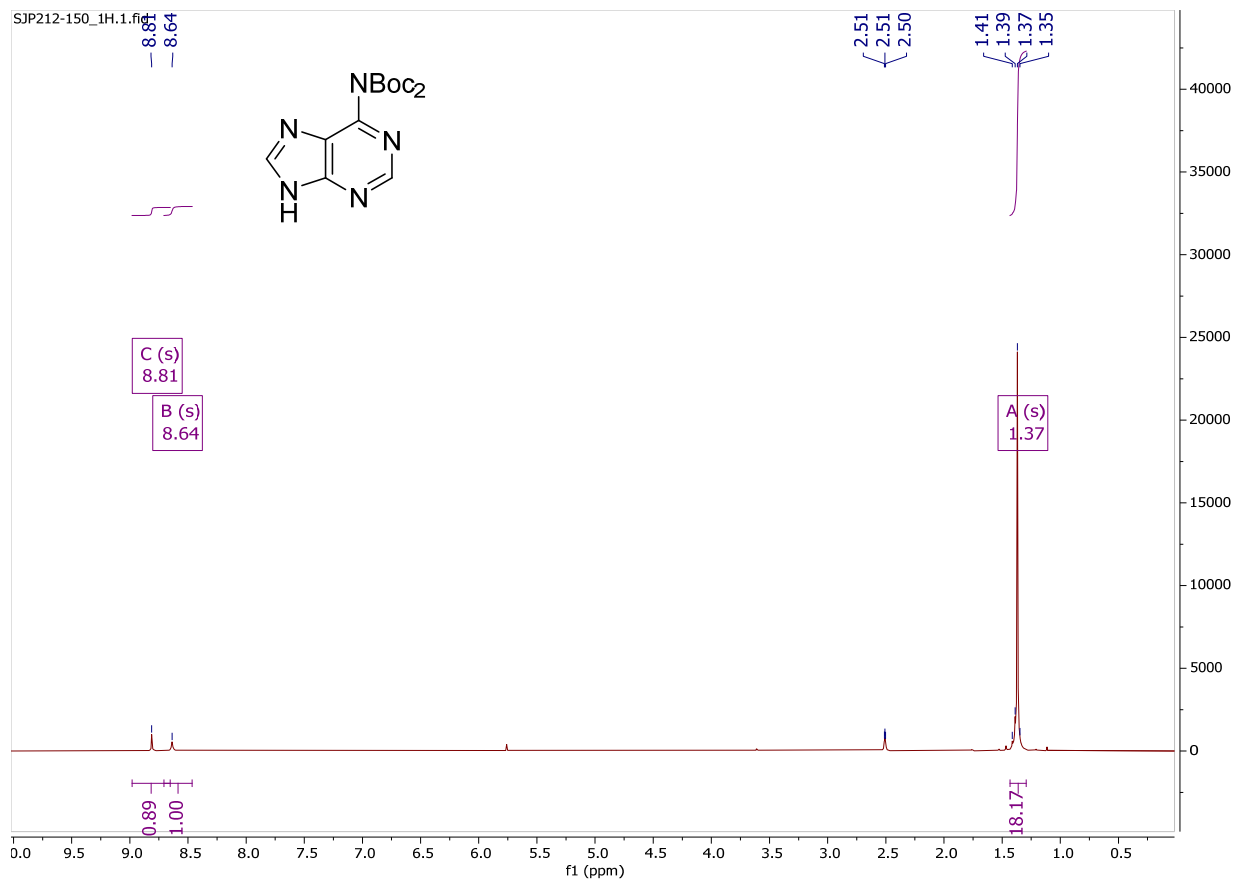

# <sup>1</sup>H NMR (13a)

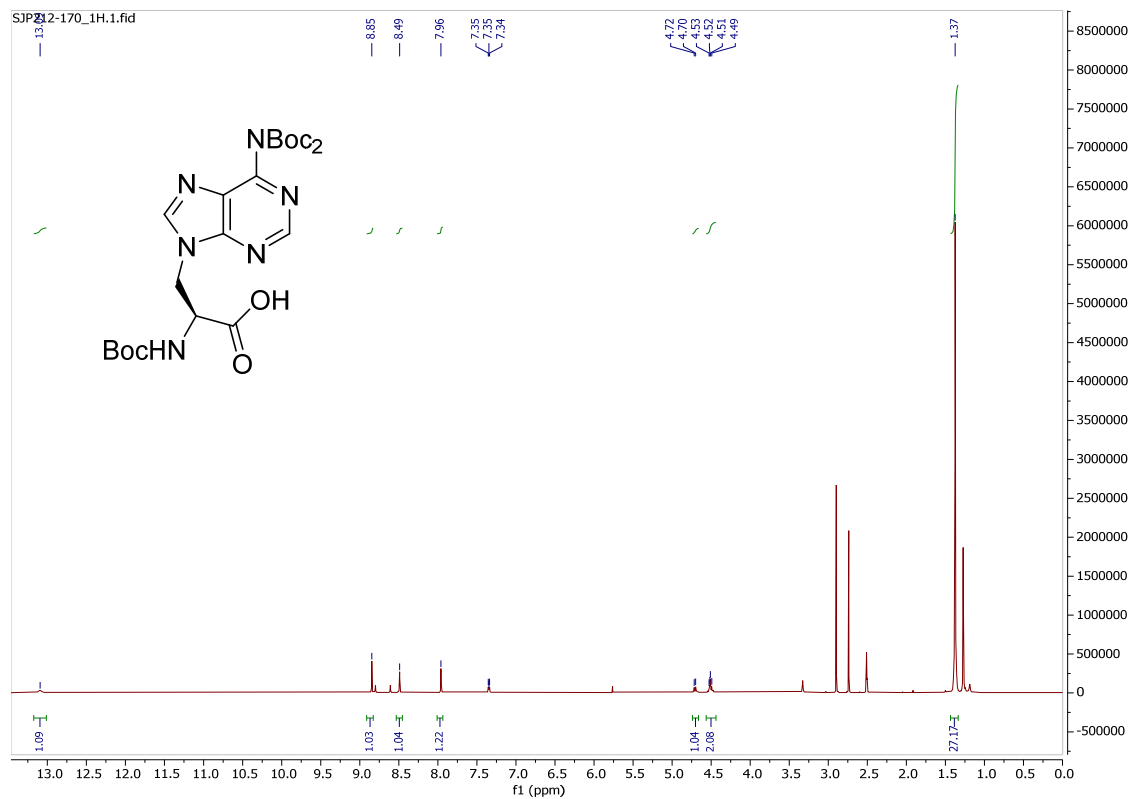

# <sup>13</sup>C NMR (13a)

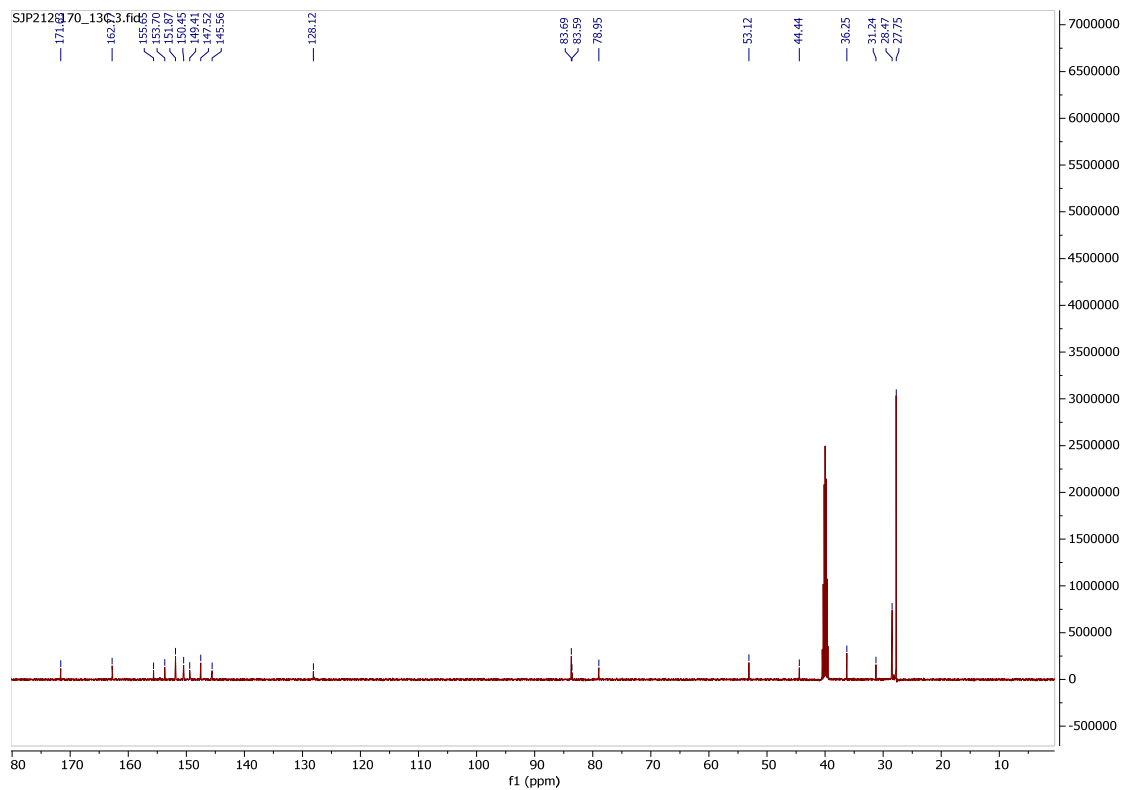

# <sup>1</sup>H NMR (13)

SJP229-180-1-1H.1.fid

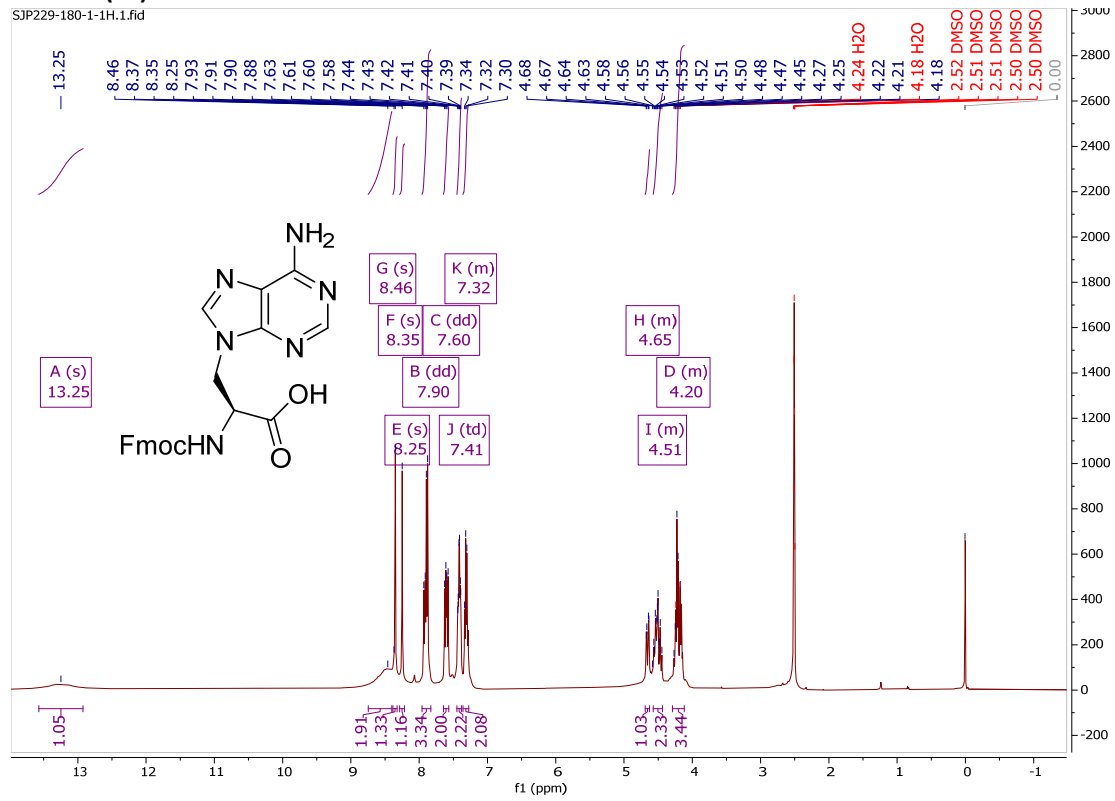

# <sup>13</sup>C NMR (13)

SJP229-180-1-13C.1.fid

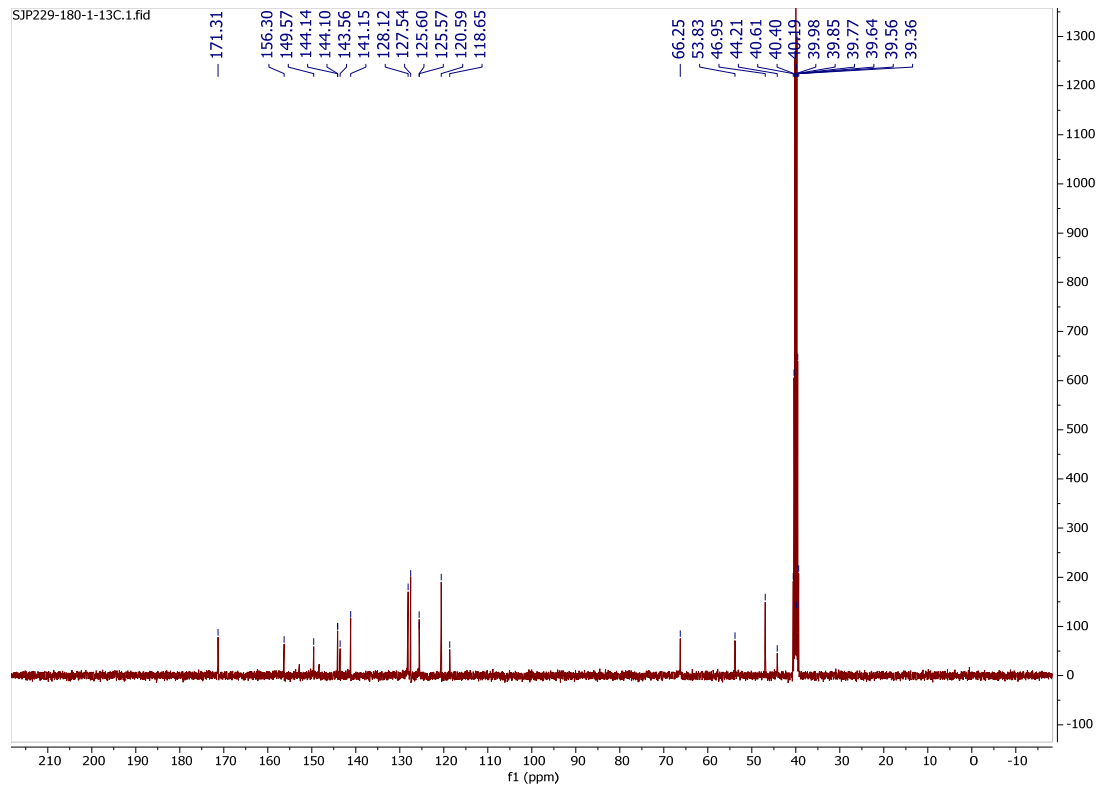

# <sup>1</sup>H NMR (14a)

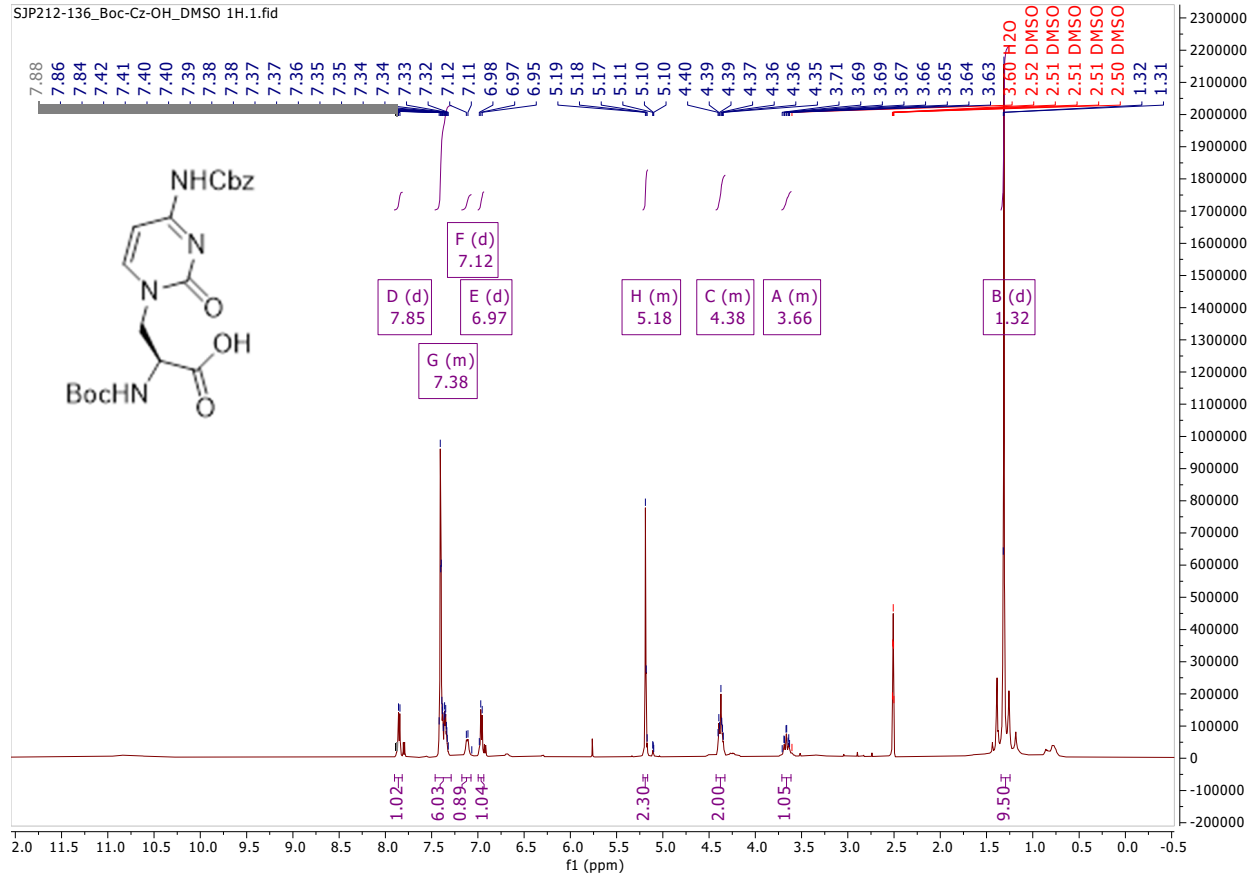

# <sup>1</sup>H NMR (14)

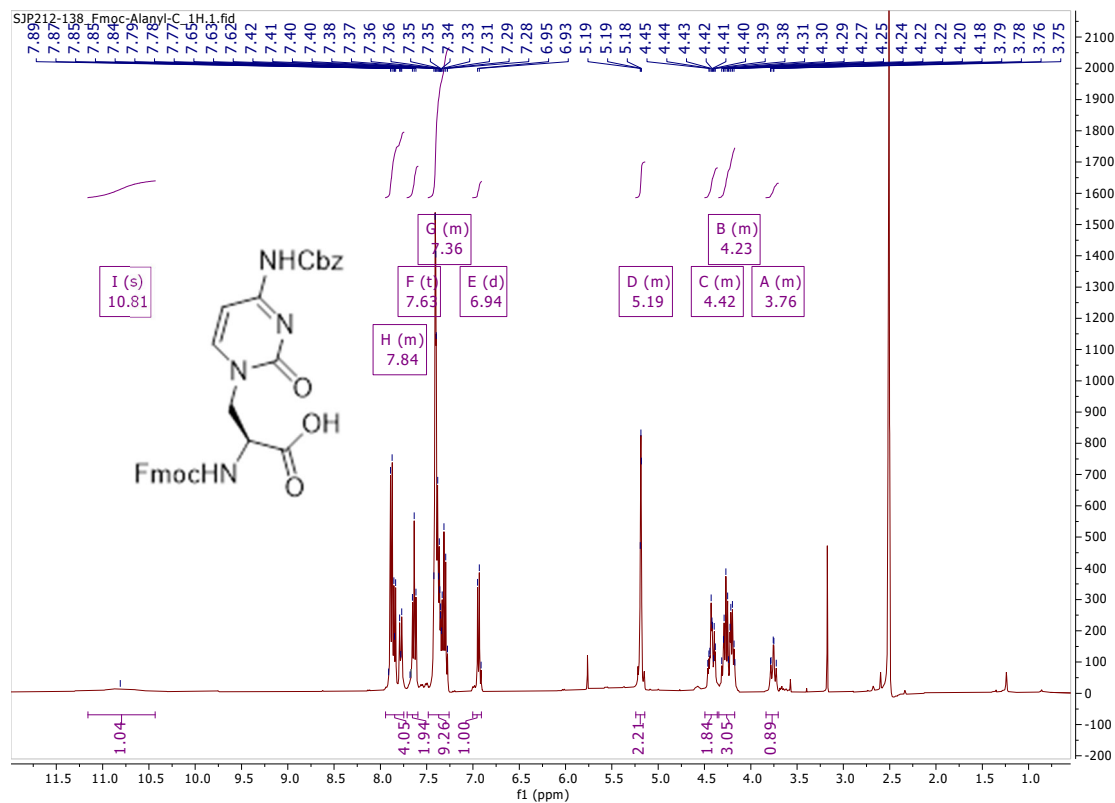

# <sup>13</sup>C NMR (14)

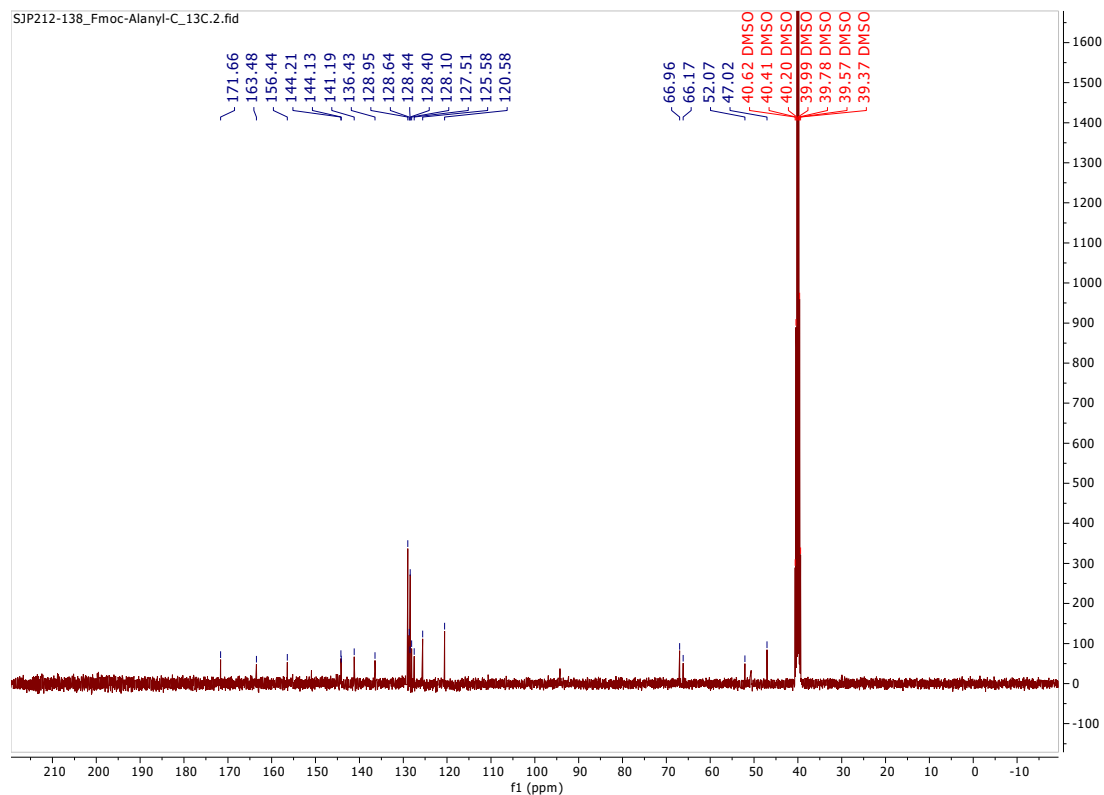

# <sup>1</sup>H NMR (15a)

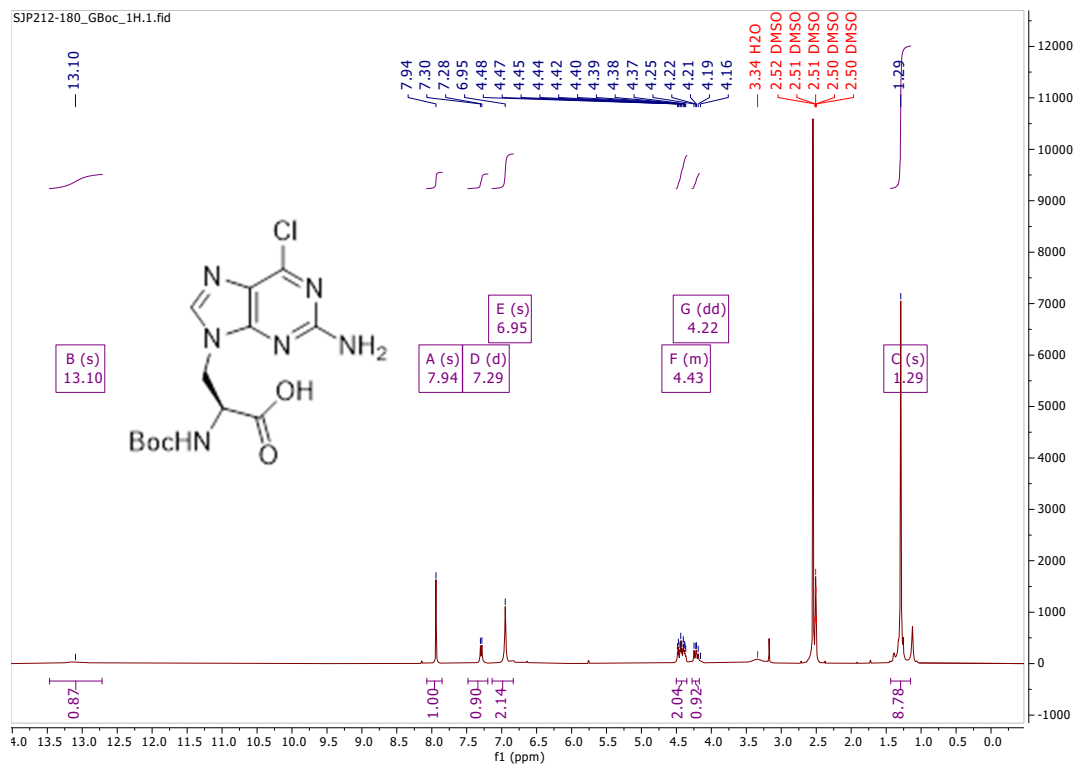

# <sup>13</sup>C NMR (15a)

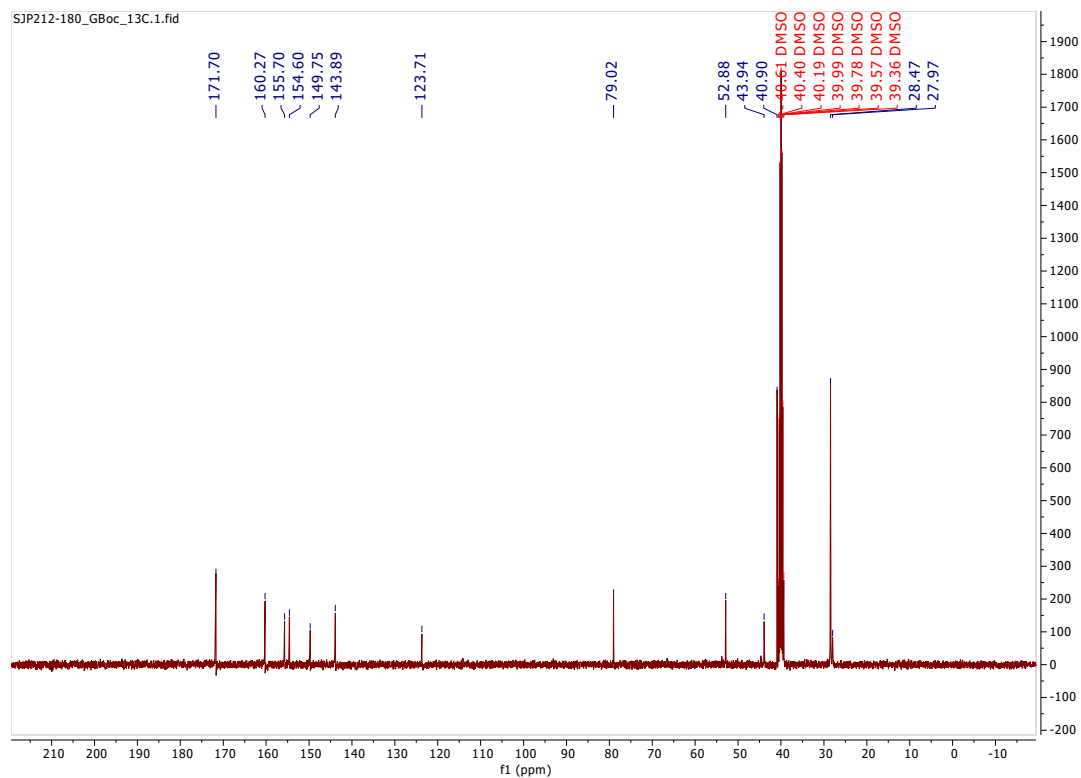

# <sup>1</sup>H NMR (15)

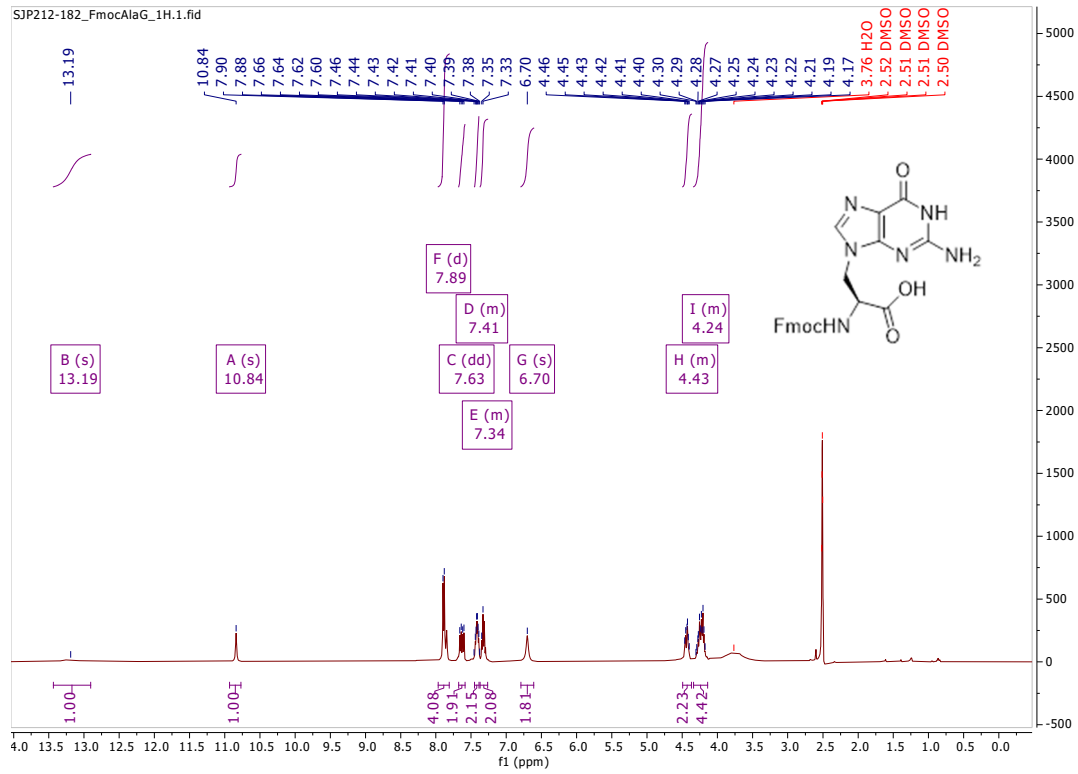

# <sup>13</sup>C NMR (15)

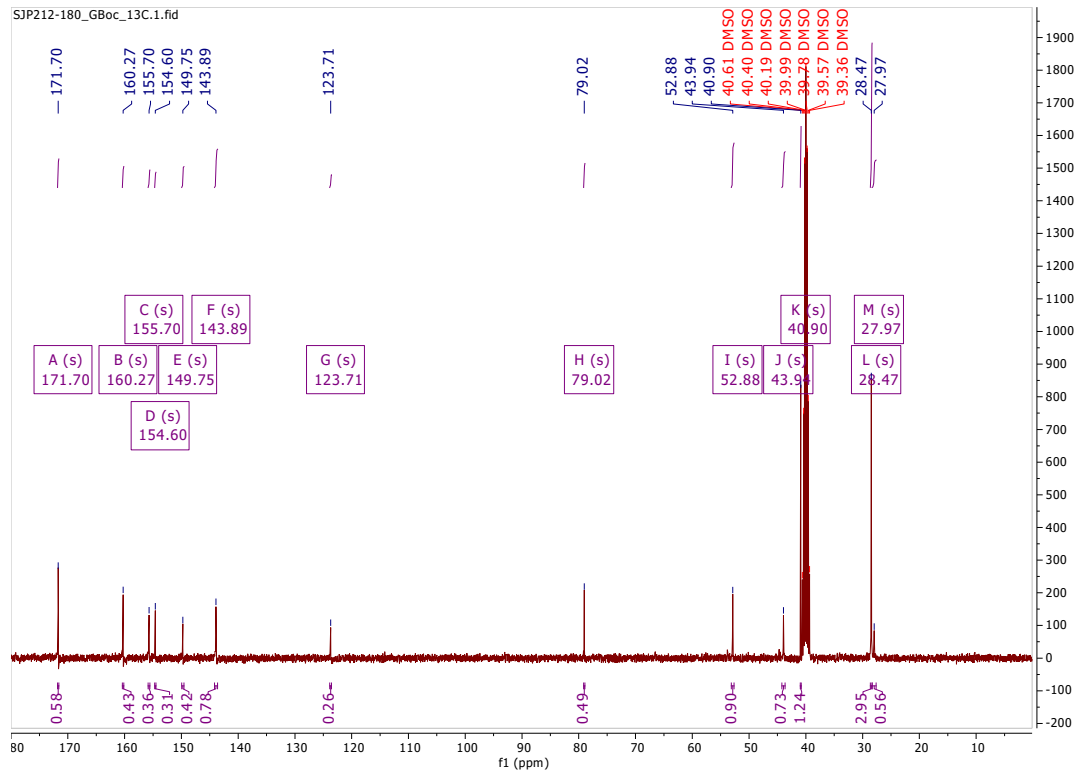

# <sup>1</sup>H NMR (16a)

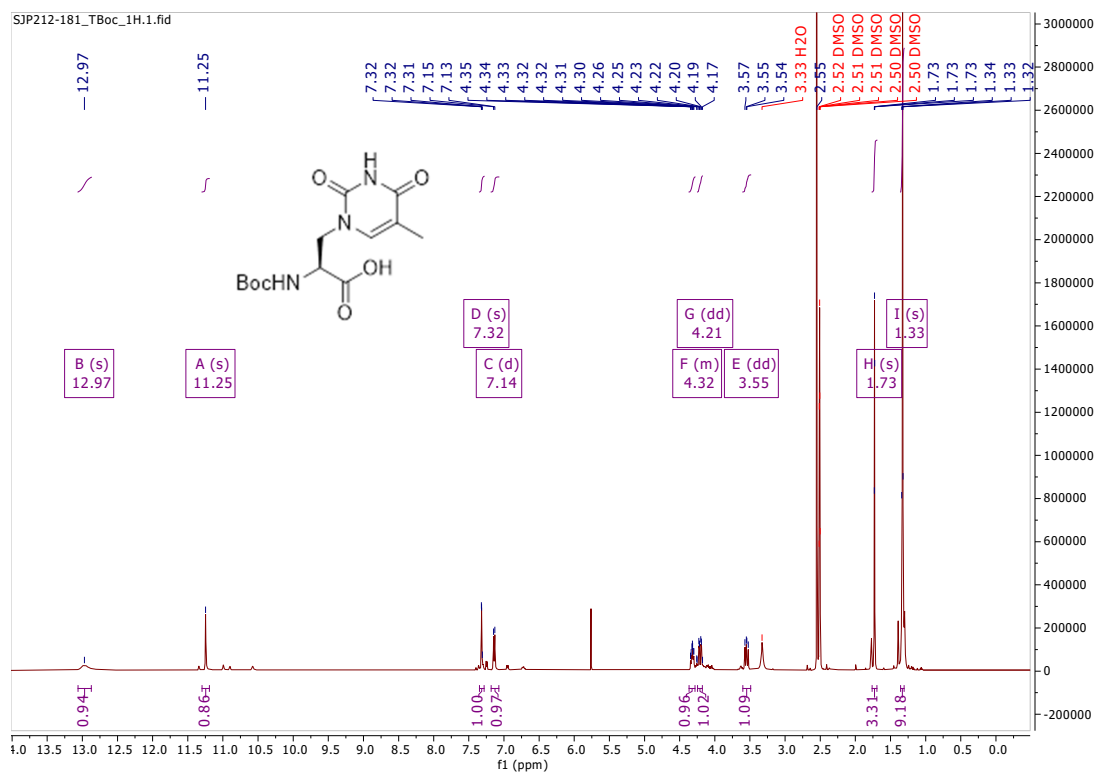

# <sup>13</sup>C NMR (16a)

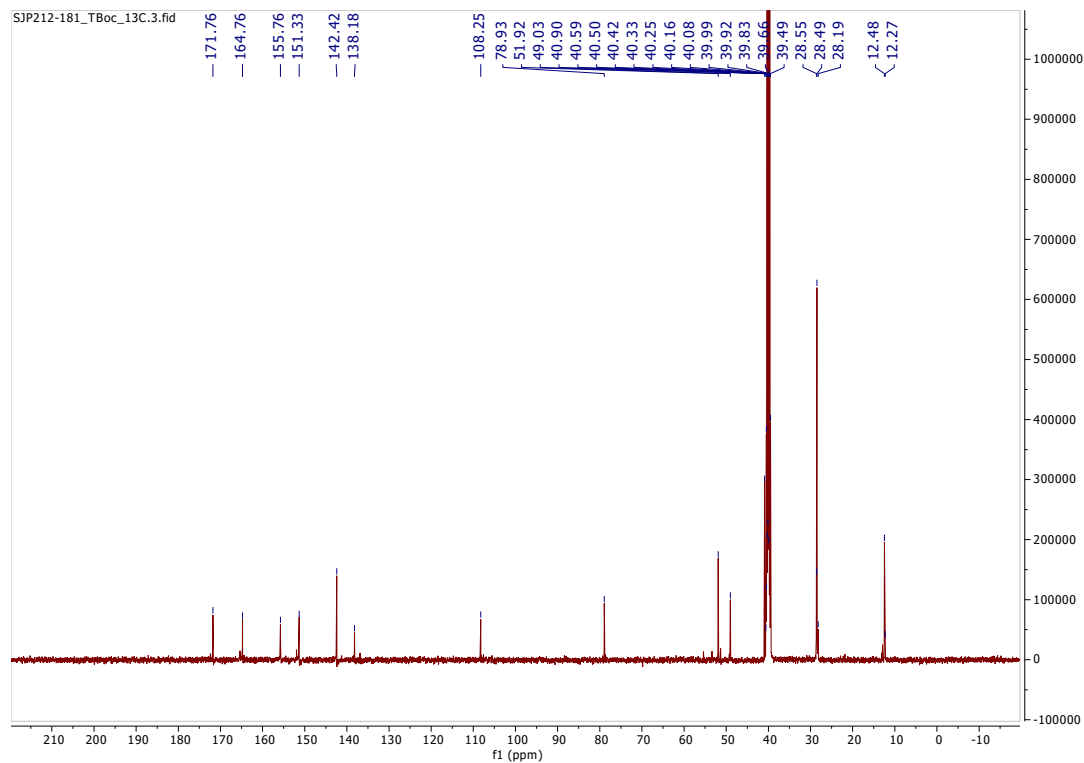



# <sup>1</sup>H NMR (16)

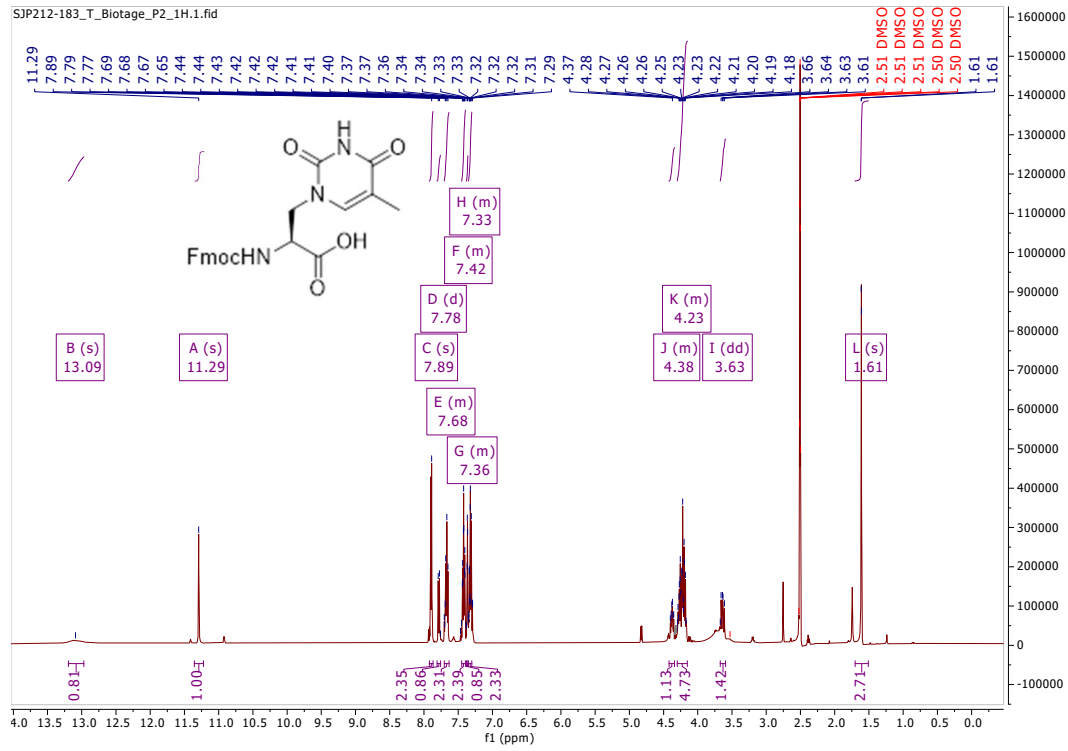

# <sup>13</sup>C NMR (16)

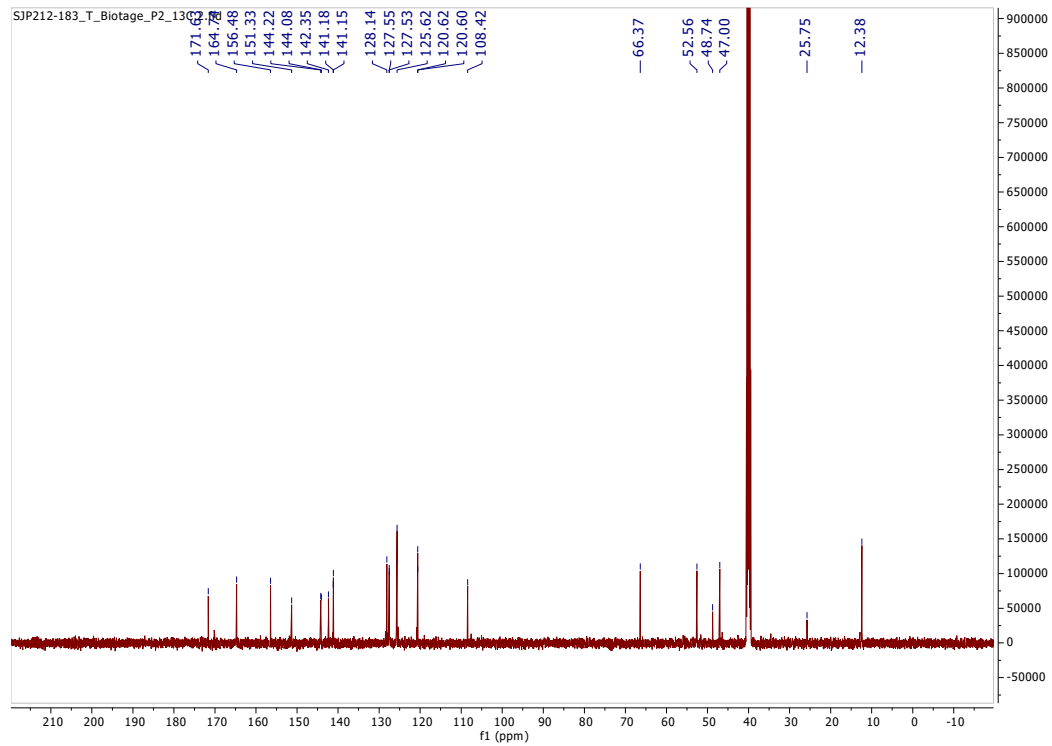

# <sup>1</sup>H NMR (17a)

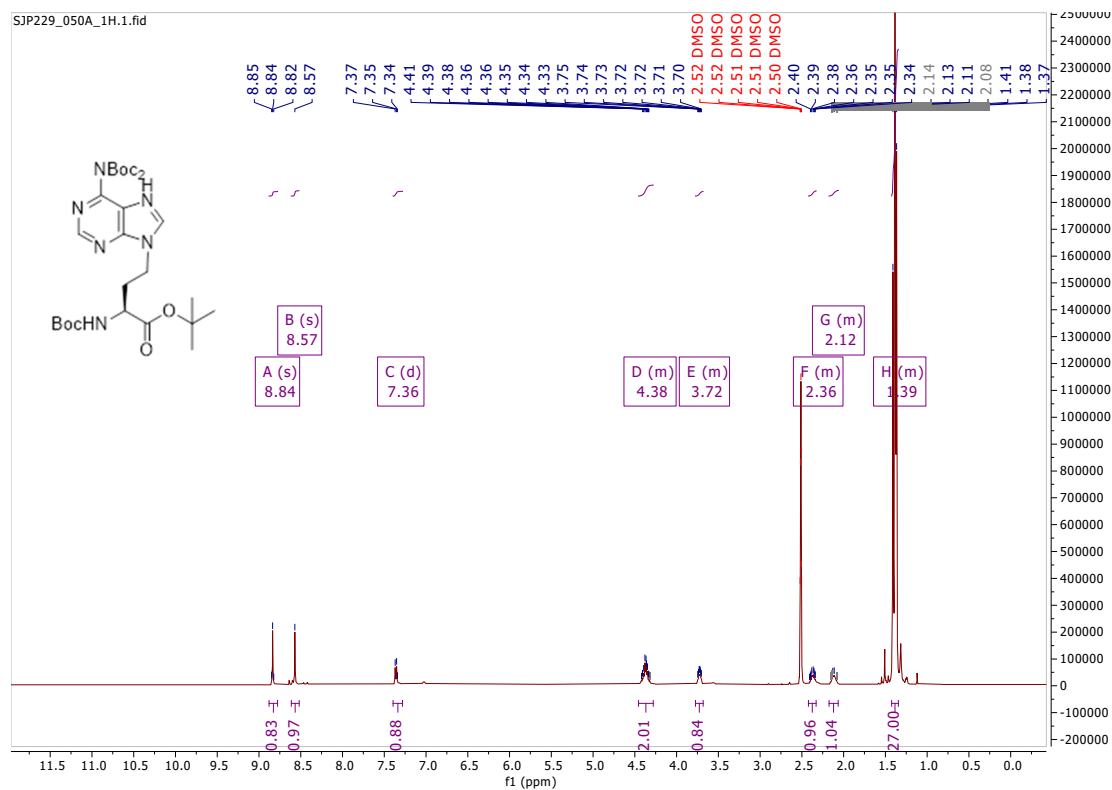

# <sup>13</sup>C NMR (17a)

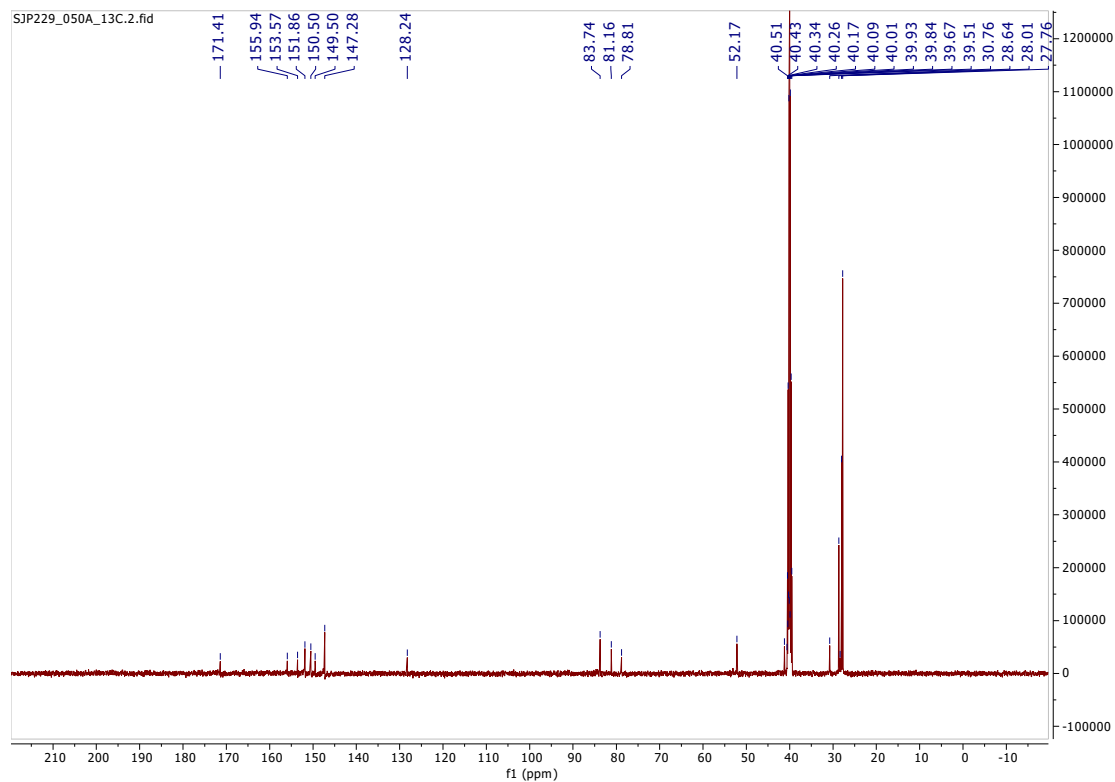

# <sup>1</sup>H NMR (17)

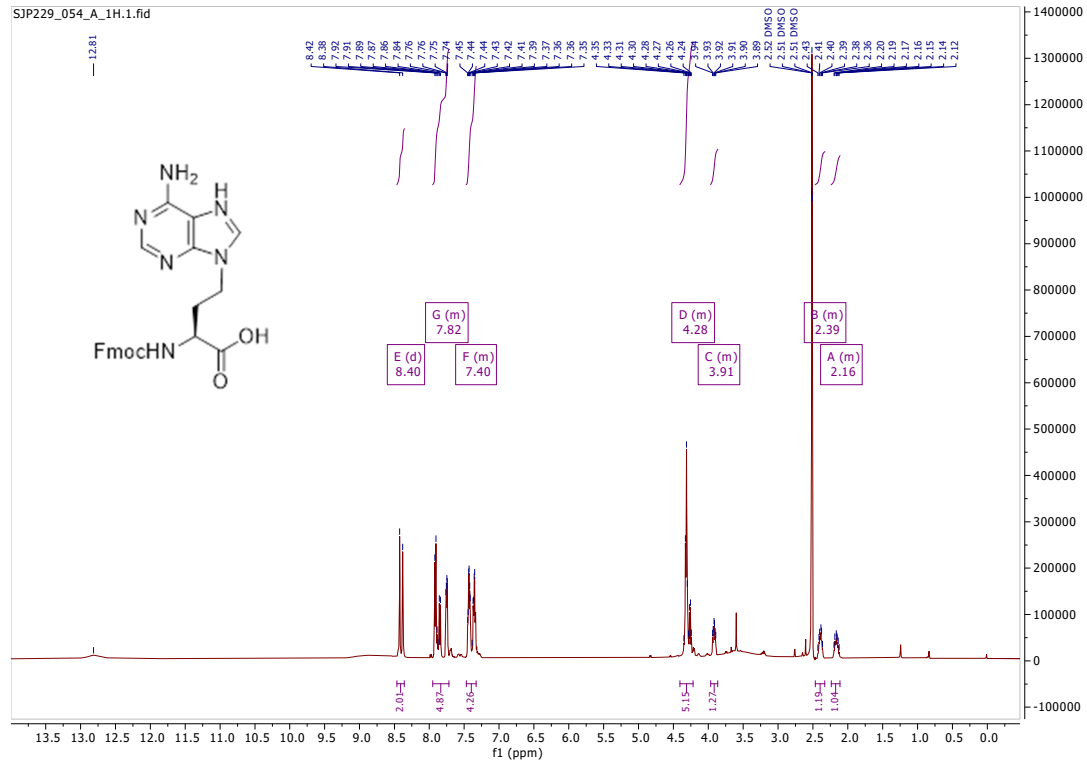

# <sup>13</sup>C NMR (17)

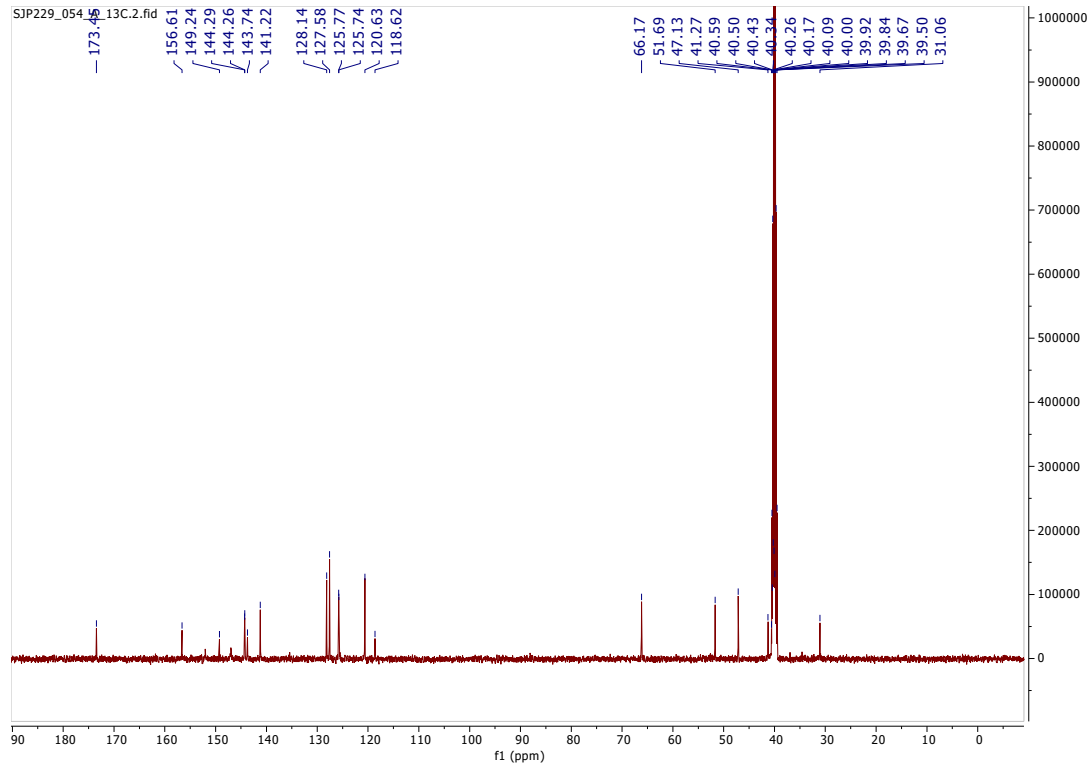

### <sup>1</sup>H NMR (18a)

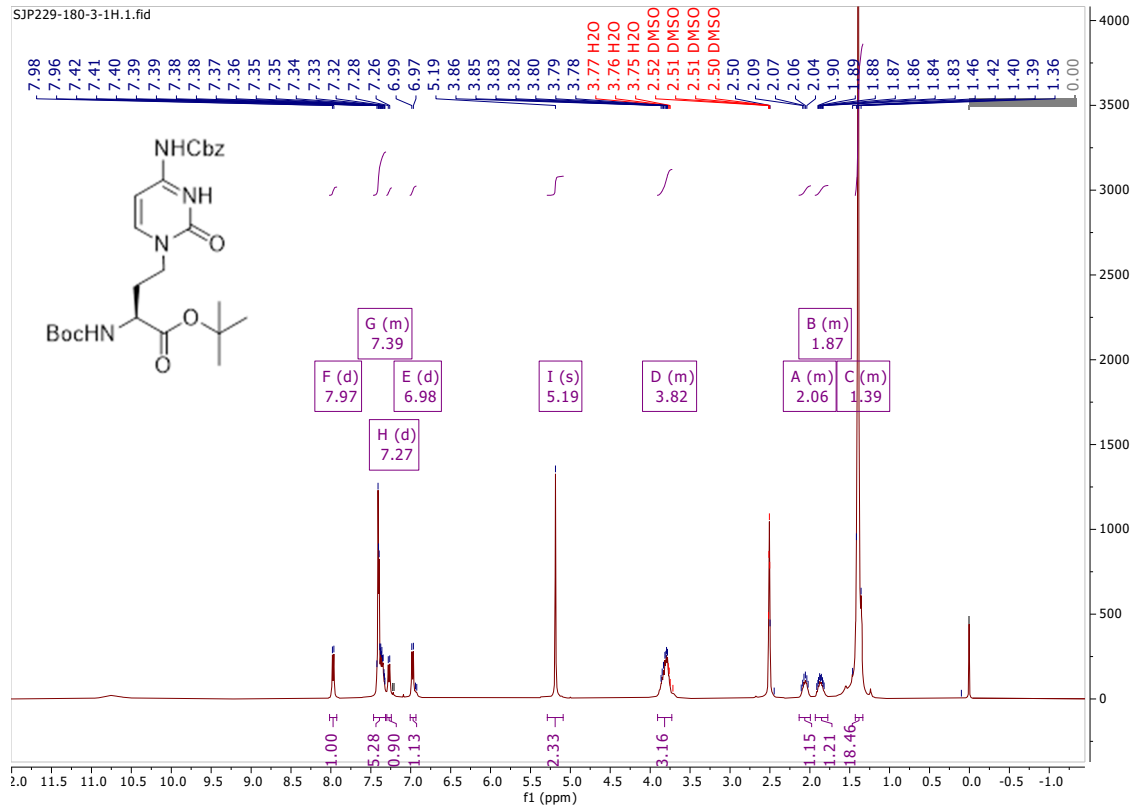

### <sup>13</sup>C NMR (18a)

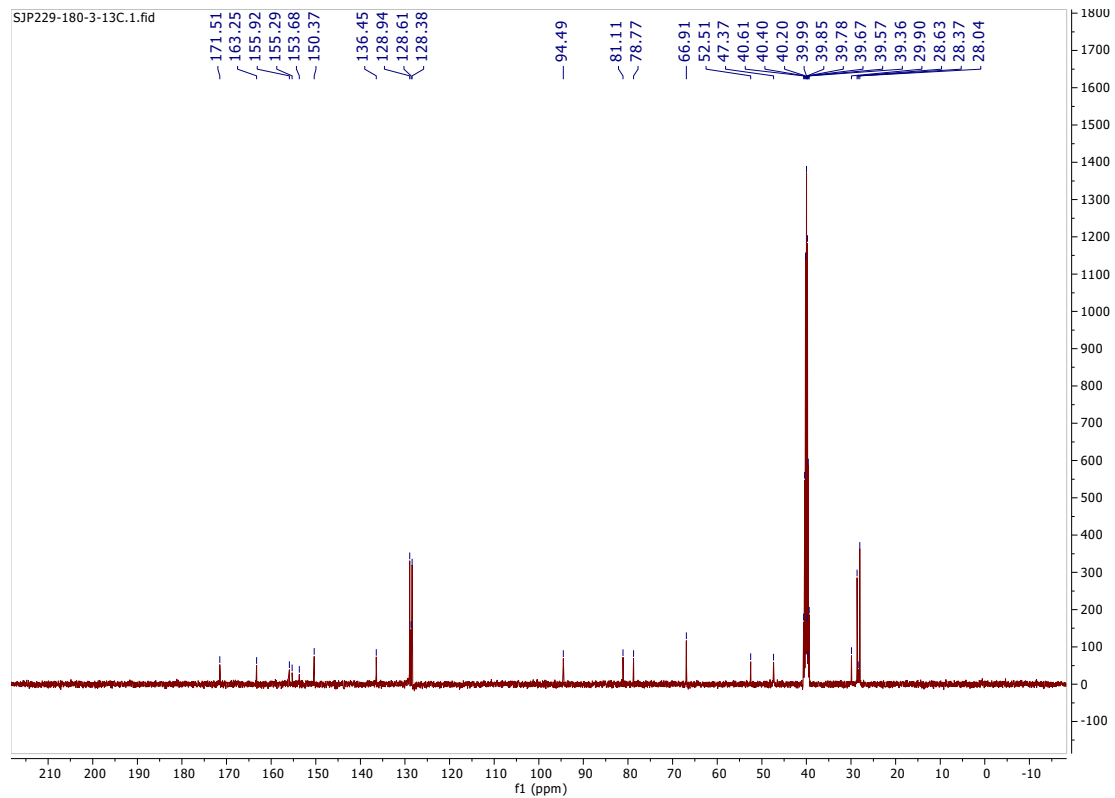

# <sup>1</sup>H NMR (18)

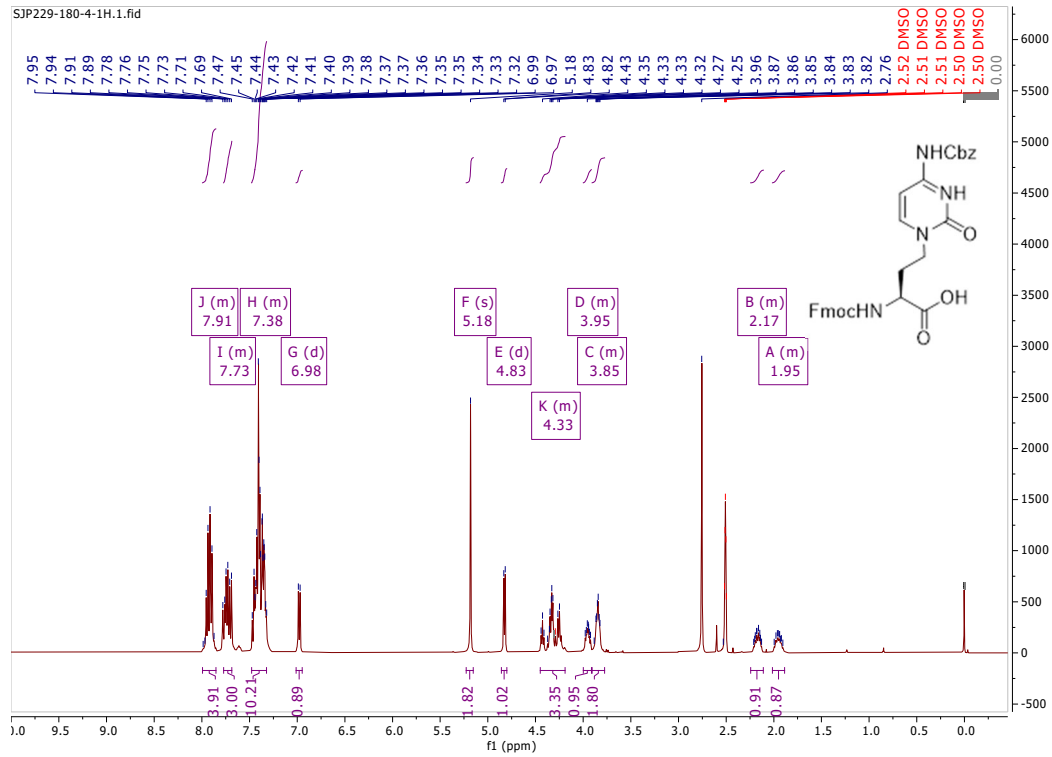

# <sup>13</sup>C NMR (18)

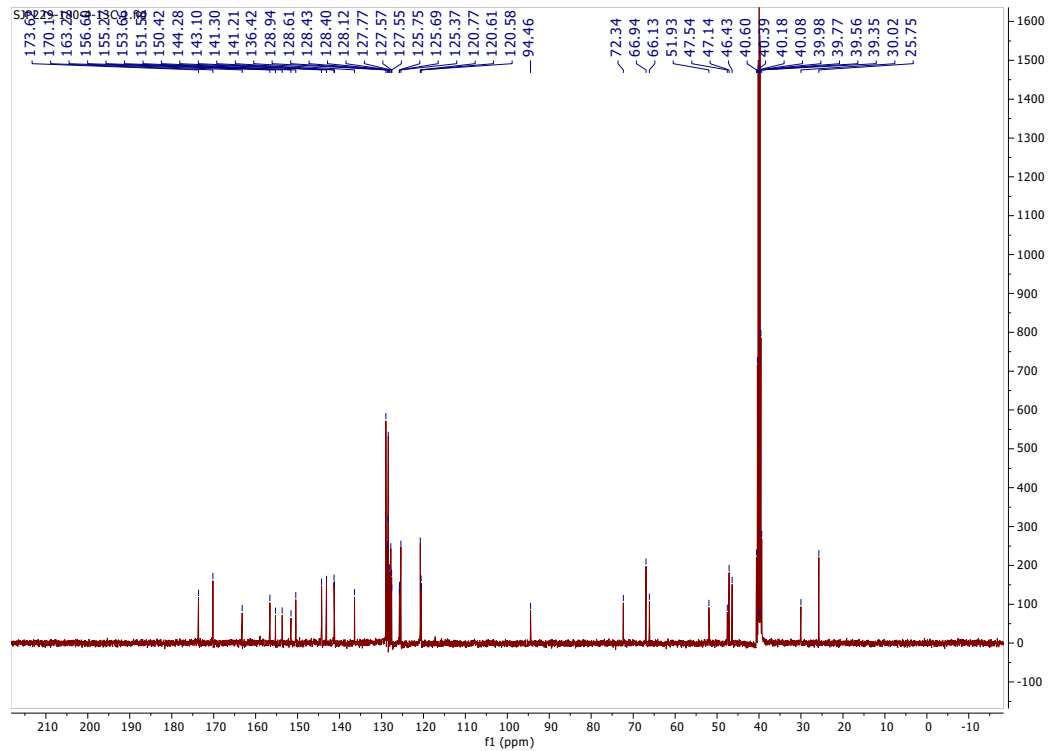

### <sup>1</sup>H NMR (19a)

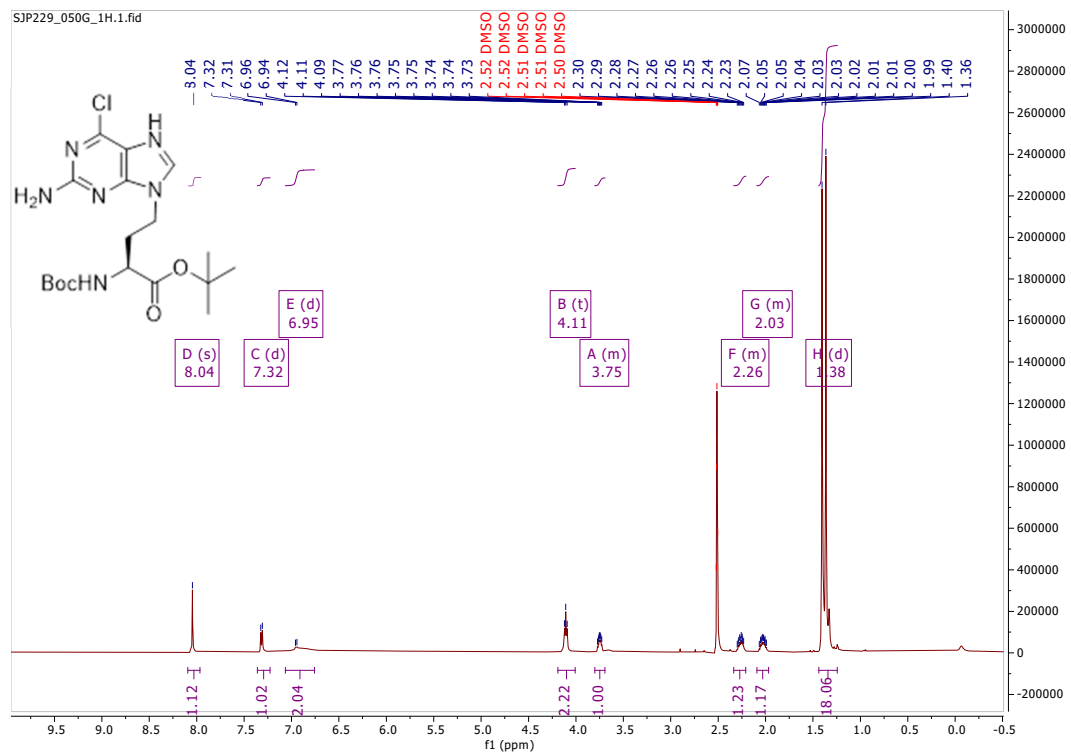

### <sup>13</sup>C NMR (19a)

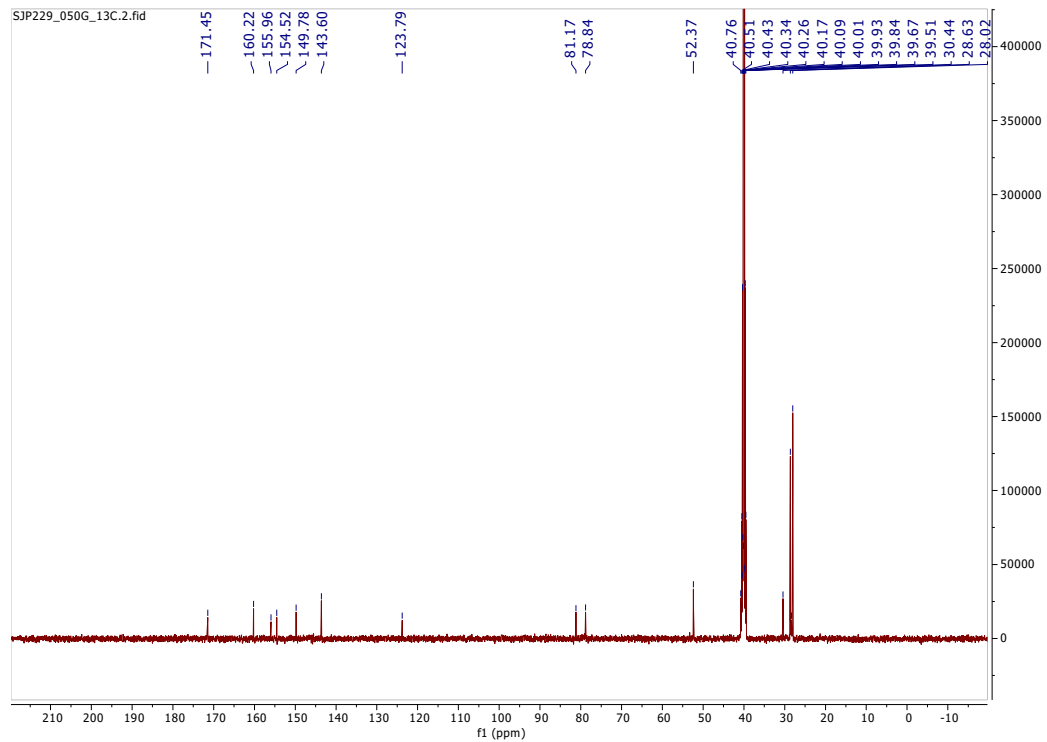

# <sup>1</sup>H NMR (19)

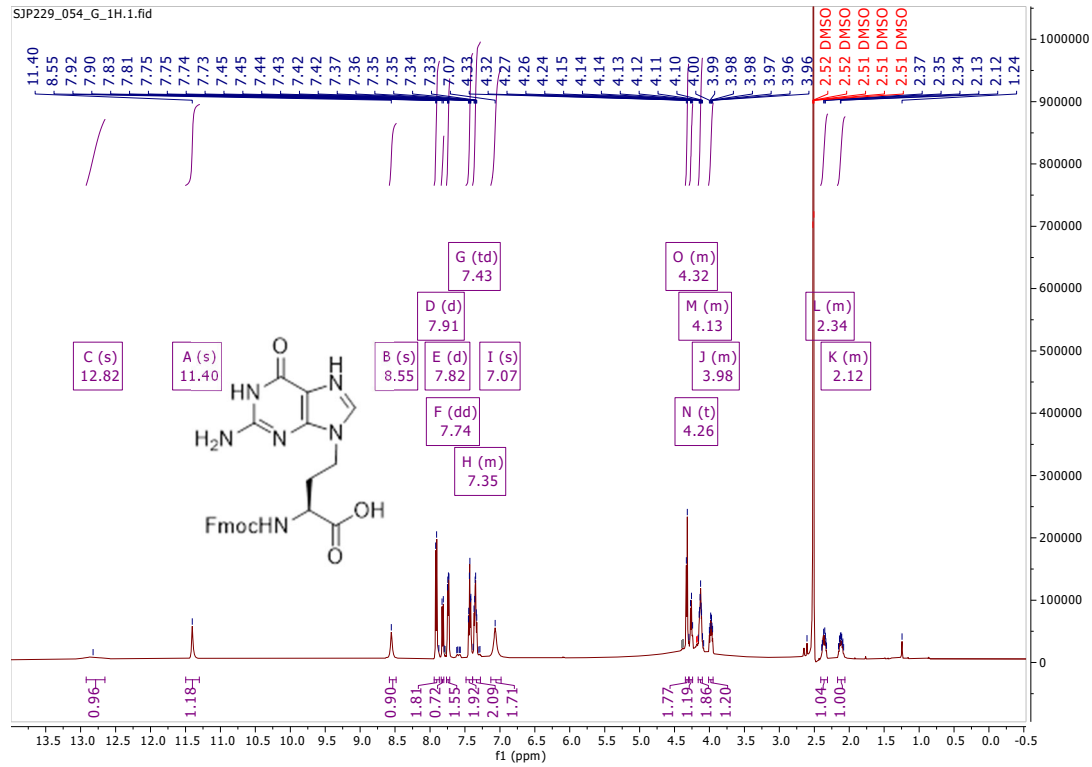

# <sup>13</sup>C NMR (19)

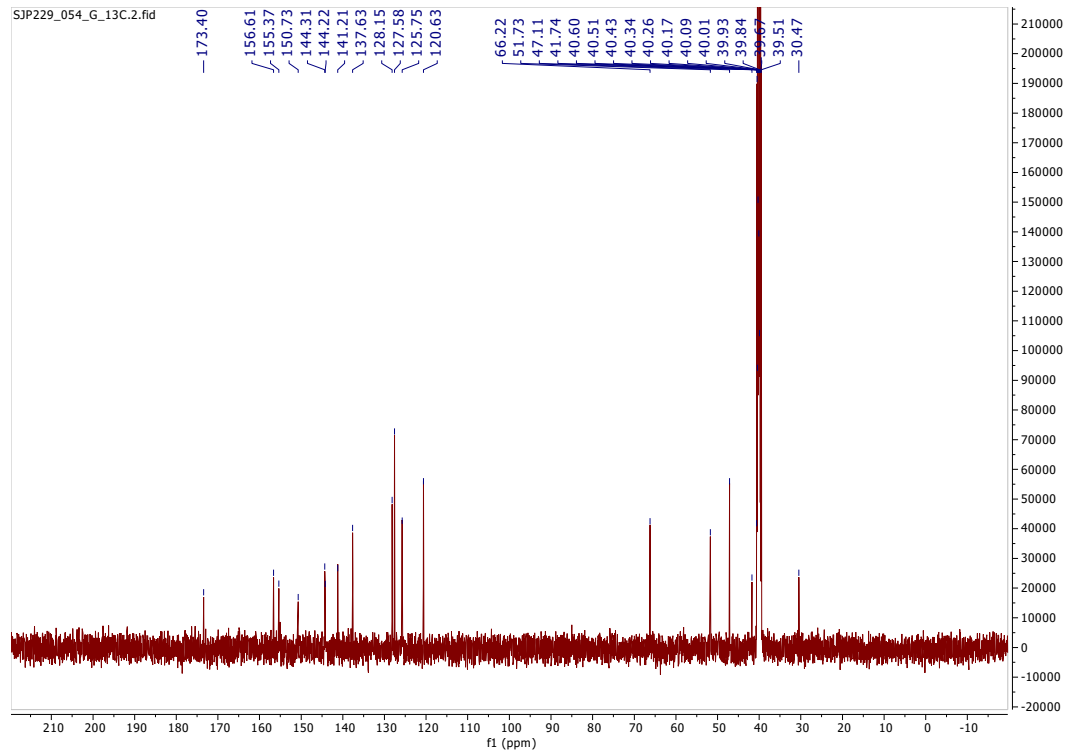

# <sup>1</sup>H NMR (20)

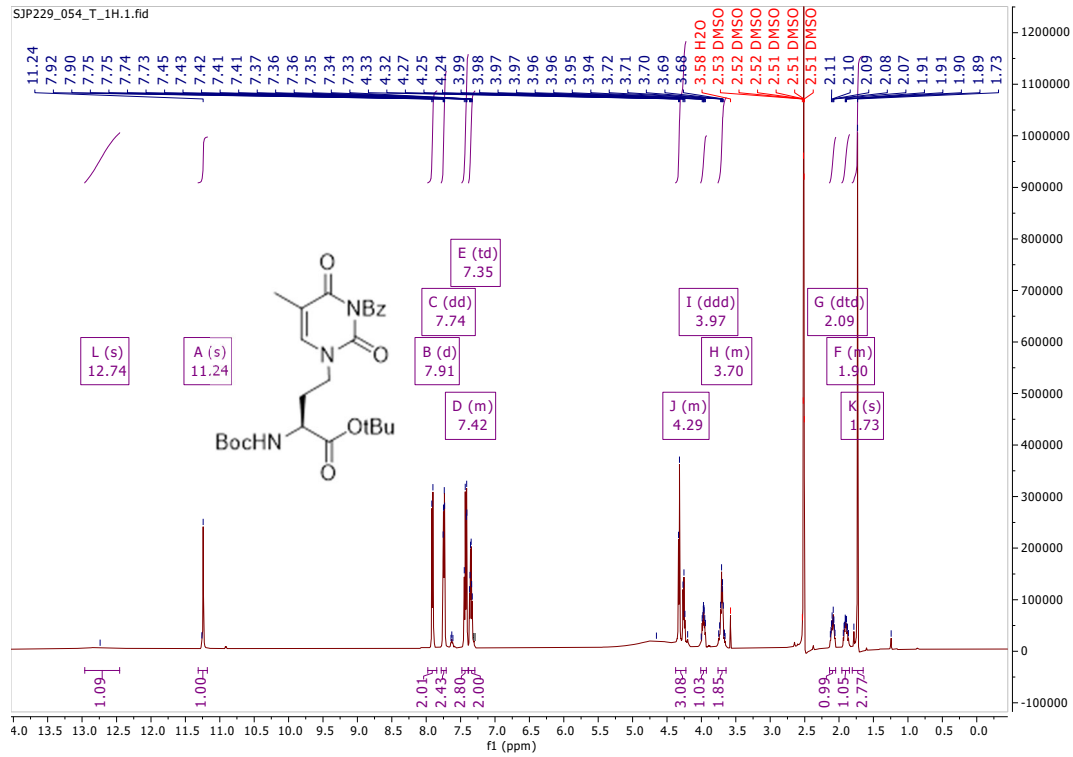

# <sup>13</sup>C NMR (20)

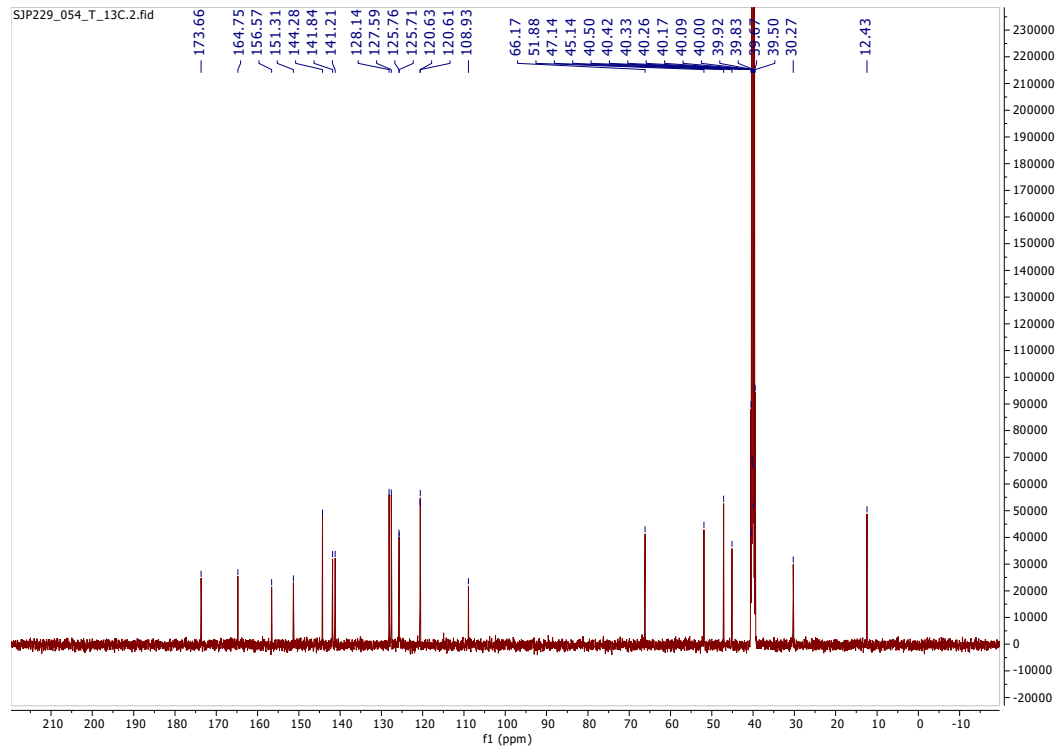



# <sup>1</sup>H NMR (21)

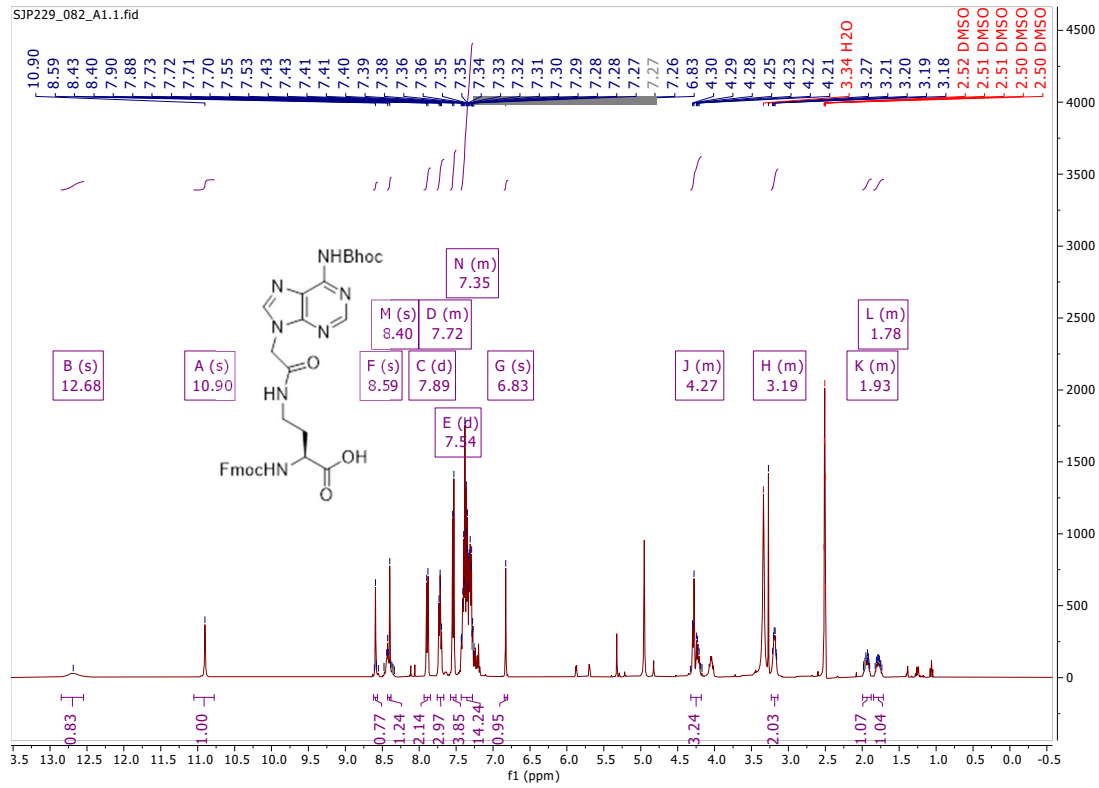

# <sup>13</sup>C NMR (21)

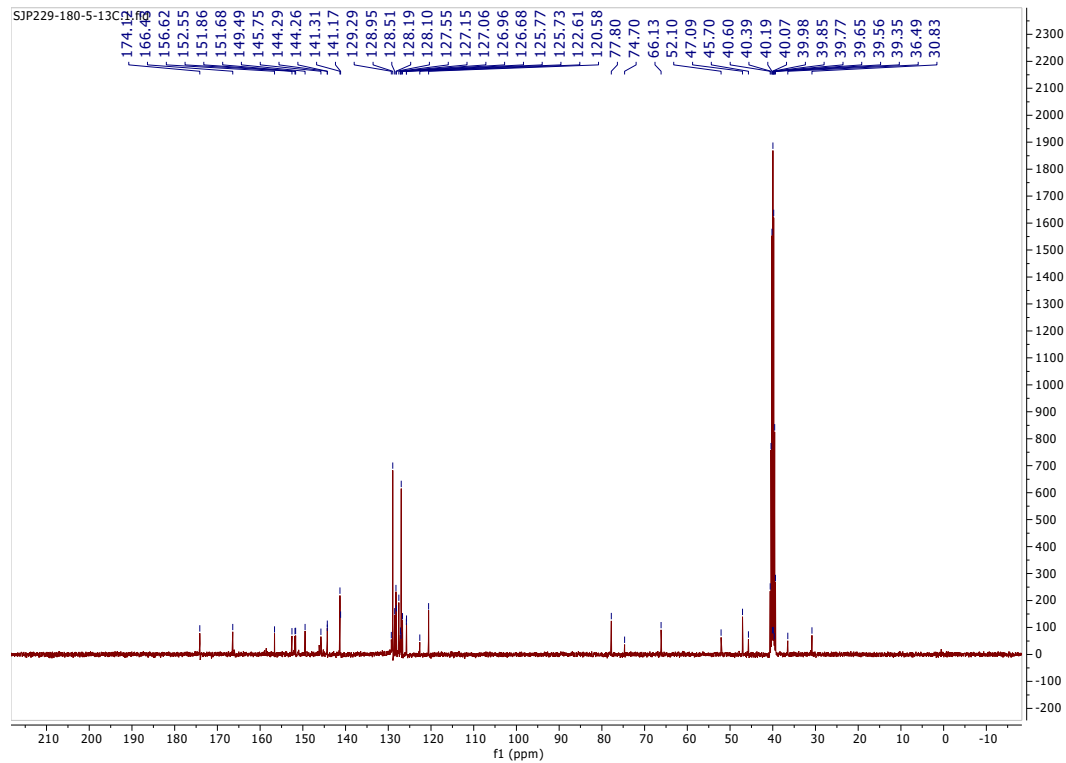

# <sup>1</sup>H NMR (22)

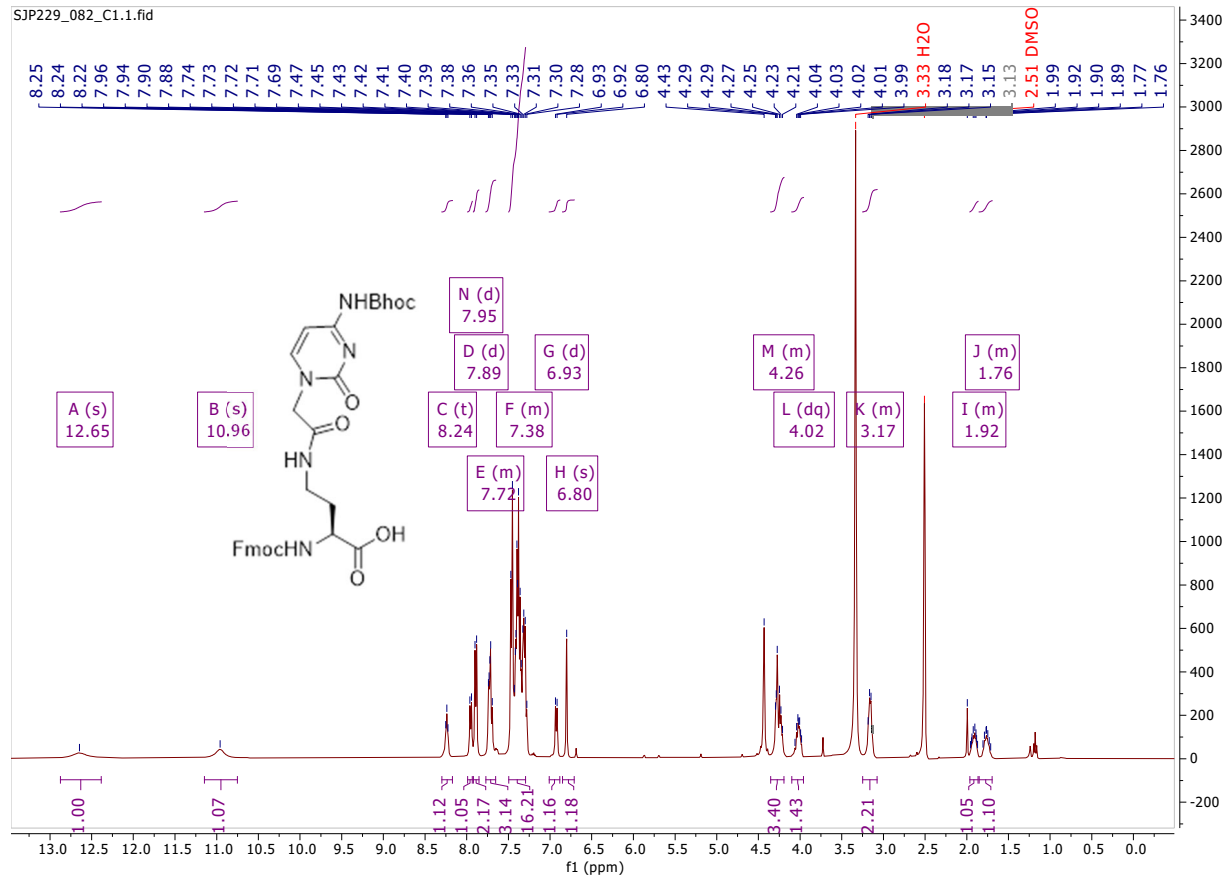

# <sup>1</sup>H NMR (23)

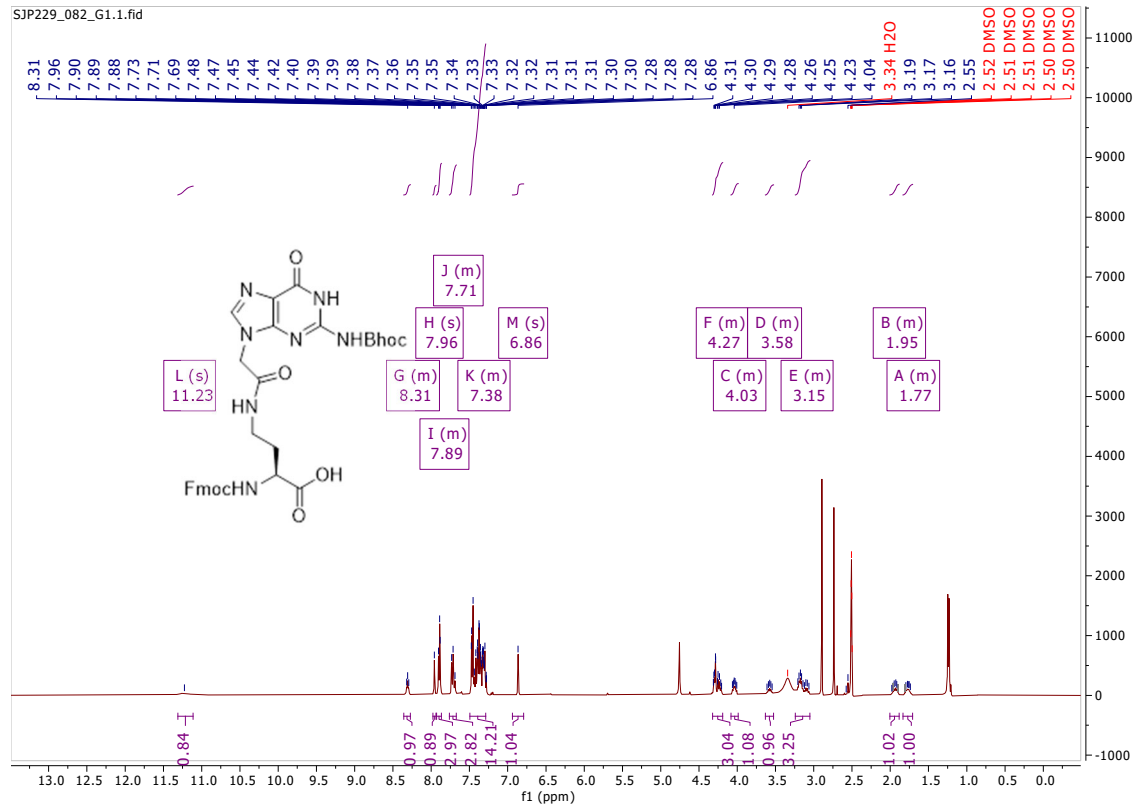

# <sup>13</sup>C NMR (23)

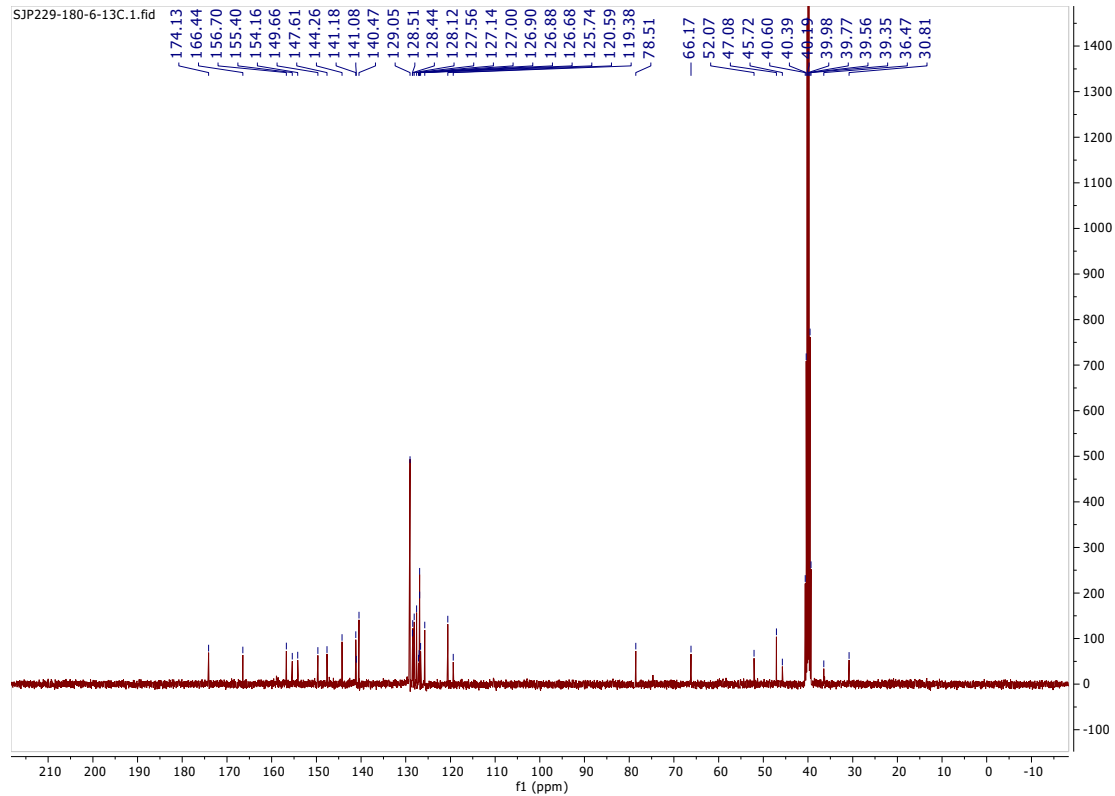

# <sup>1</sup>H NMR (24)

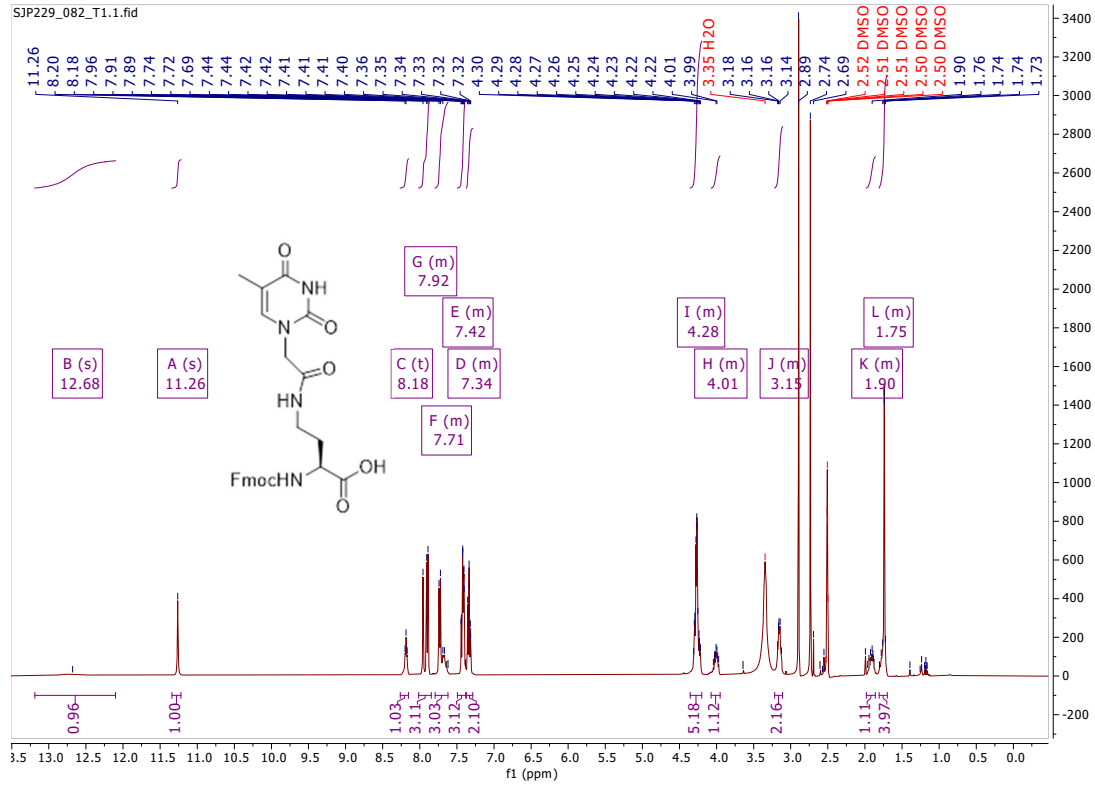

## Peptide synthesis procedures

**General procedure for manual solid-phase peptide synthesis (SPPS).** ChemMatrix® Rink amide resin (loading 0.49 mmol/g, typical scale: 200 mg, 0.1 mmol) was loaded into a fritted syringe (12 mL), swollen in DMF (5 mL) for 5 minutes and then drained. Each N $\alpha$ -Fmoc protected amino acid (1.0 mmol, 10 equiv) was dissolved in DMF containing 0.39 M HATU (2.5 mL). Immediately before the coupling DIEA (500  $\mu$ L, 30 equiv) was added to the mixture to activate the amino acid. This solution (after 15 seconds) was added to the resin and reacted for 10 min, with occasional stirring. After completion of the coupling step, the syringe was drained, and the resin was washed with DMF (3 x 10 mL). Fmoc deprotection was performed by addition of piperidine (20% in DMF, 5 mL), to the resin (1 x 1 min + 1 x 5 min), followed by draining and washing the resin with DMF (5 x 10 mL). Side chain protection was as follows: Asn(Trt), Asp(O<sup>t</sup>Bu), Cys(Trt), Gln(Trt), Glu(O<sup>t</sup>Bu), His(Trt), Lys(Boc), Ser(<sup>t</sup>Bu), Thr(<sup>t</sup>Bu), Trp(Boc), Tyr(<sup>t</sup>Bu).

**General procedure for the coupling of nucleobase monomers:** for a 10  $\mu$ mol scale coupling: nucleobase amino acid (50  $\mu$ mol) and PyAOP (50  $\mu$ mol) were dissolved in DMF (250  $\mu$ L, 0.1 M reactant concentration). DIEA (150  $\mu$ mol) was added and the solution incubated with the peptide resin for 20 min at room temperature with occasional stirring.

**Procedure for nucleobase peptide cleavage.** Upon completion of the peptide synthesis, the resin was treated with a cleavage cocktail containing (v/v) 63% TFA, 21% TMSOTf, 4% 1,2-ethanedithiol (EDT), 10% thioanisole and 2% cresol (v/v) at room temperature for 1 h. The TFA volume was then reduced under N<sub>2</sub> stream and cold diethyl ether (–78 °C) was added to precipitate the peptide. The resulting suspension was centrifugated at 4000 rpm for 3 min and the liquid was discarded. After repeating this step twice more, the pellet was dissolved in Milli-Q ultrapure water + 0.1% TFA and lyophilized.

**Procedure for peptide cleavage.** Upon completion of the peptide synthesis, the resin was treated with a cleavage cocktail containing 94% TFA, 2.5% water, 2.5% 1,2-ethanedithiol (EDT) and 1% triisopropylsilane (TIPS) (v/v) at room temperature for 2 h. The TFA volume was then reduced under N<sub>2</sub> stream and cold diethyl ether (–80 °C) was added to precipitate the peptide. The resulting suspension was centrifugated at 4000 rpm for 3 min and the liquid was discarded. After repeating this step twice more, the pellet was dissolved in Milli-Q ultrapure water + 0.1% TFA and lyophilized.

**General procedure for solid-phase extraction (SPE) purification.** Peptides were desalted using C18 SPE cartridges according to general procedures from Agilent Sample Prep Solutions Bond Elut.

**Preparation of peptide solutions.** Weight of lyophilized peptide was determined with analytical scale. The peptide's molecular weight plus  $n \times 114$  ( $n$  = number of K, R, H and N-term, 114 = mw TFA) was used to calculate number of moles. In case of the libraries the average mw of all used monomers was multiplied by the number of variable positions. The peptide was then dissolved in a volume according to the desired final concentration.

**Determination of oligonucleotide concentration.** The concentration of oligonucleotides was calculated using the Beer-Lambert law by measuring the absorbance of the oligo sample at 260 nm. The absorbance was measured by averaging at least two independent readings of the same sample on a BioTek Synergy HT plate reader outfitted with a BioTek Take 3 micro-volume plate.

## Nucleobase peptide and peptide characterization

### Test of nucleobase monomers incorporation into short peptide by SPPS

Individual purities were calculated by integration of relevant peaks in the LCMS TIC chromatograms

#### Nucleobase peptide 26

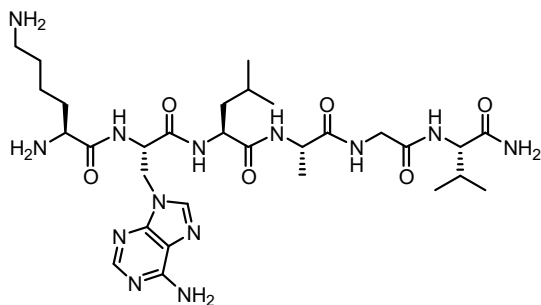

HRMS (SI-QToF)  $m/z$ :  $[M+H]^+$  calcd. 690.416 found 690.419

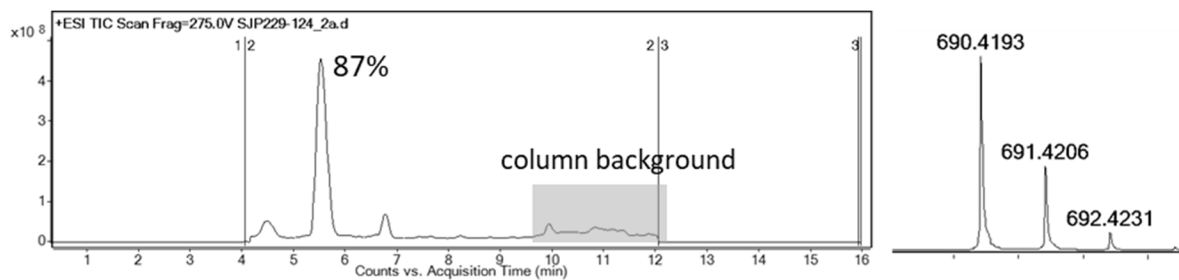

#### Nucleobase peptide 27

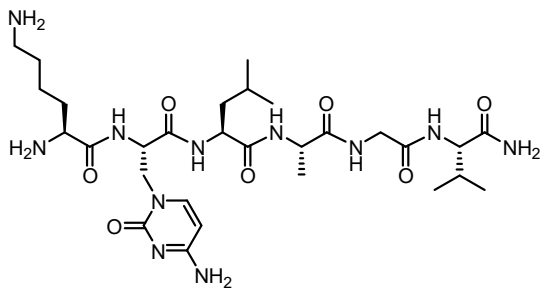

HRMS (SI-QToF)  $m/z$ :  $[M+H]^+$  calcd. 666.405 found 666.408

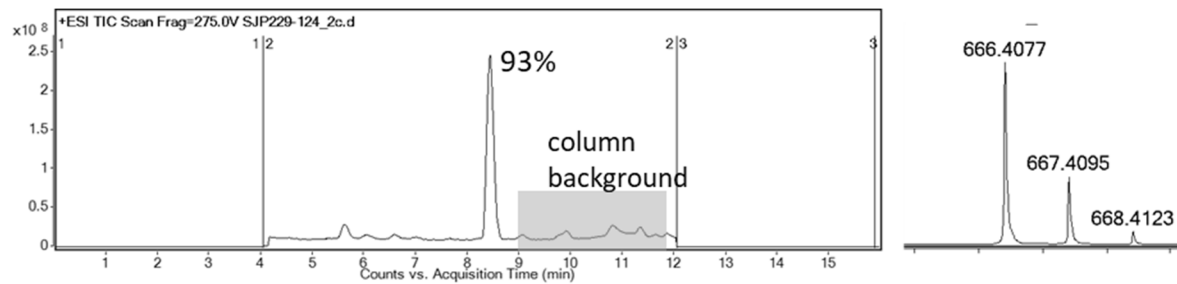

### Nucleobase peptide 28

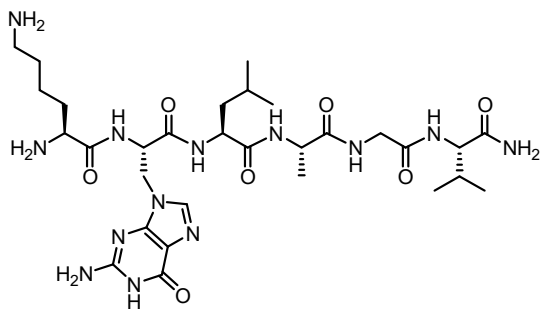

HRMS (SI-QToF)  $m/z$ :  $[M+H]^+$  calcd. 706.411 found 706.415

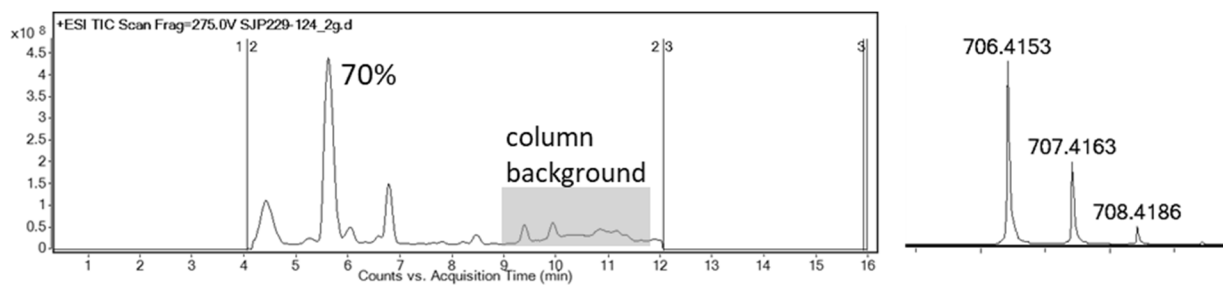

### Nucleobase peptide 29

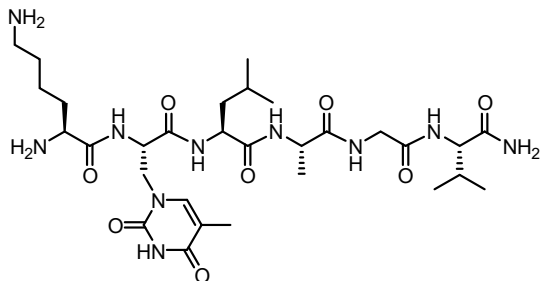

HRMS (SI-QToF)  $m/z$ :  $[M+H]^+$  calcd. 681.402 found 681.407

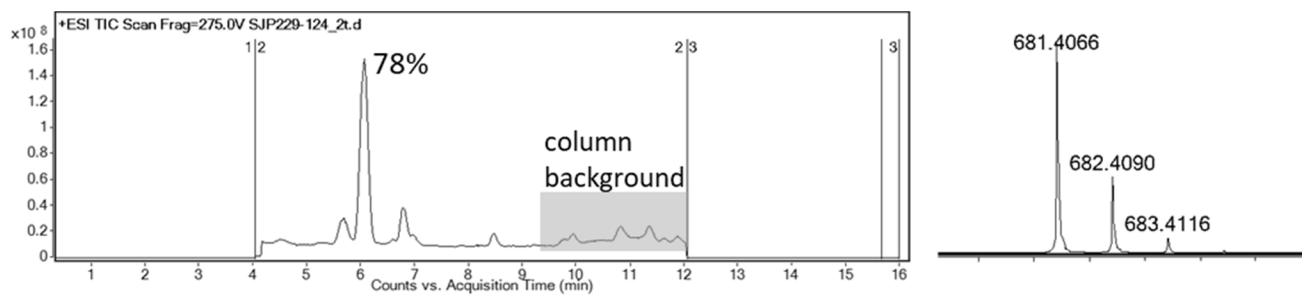



### Nucleobase peptide 30

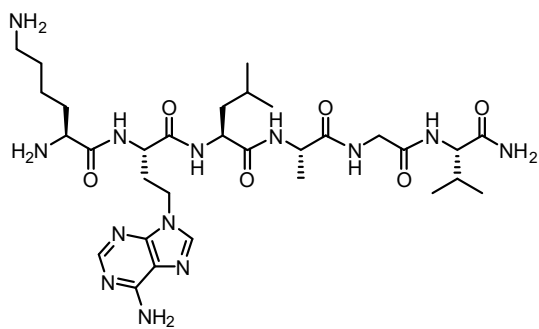

HRMS (SI-QToF)  $m/z$ :  $[M+H]^+$  calcd. 704.432 found 704.433

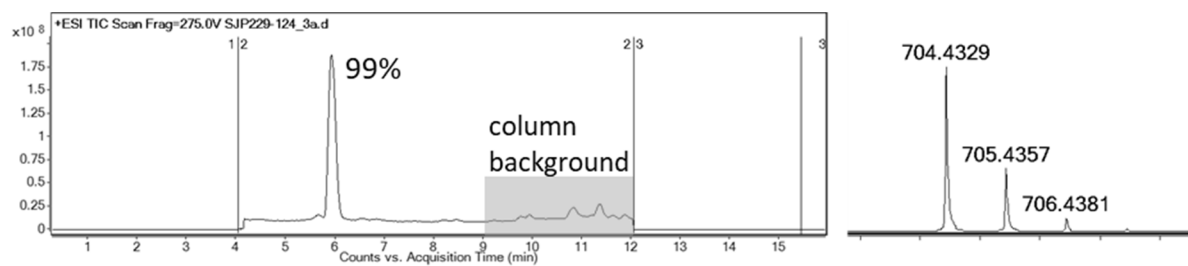

### Nucleobase peptide 31

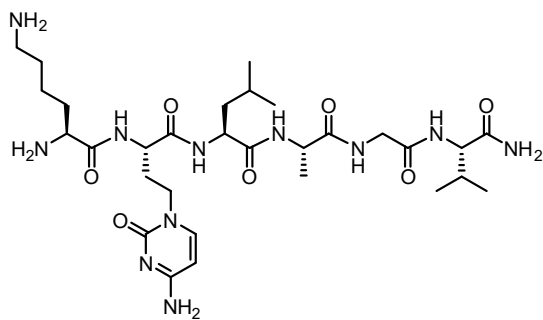

HRMS (SI-QToF)  $m/z$ :  $[M+H]^+$  calcd. 680.421 found 680.428

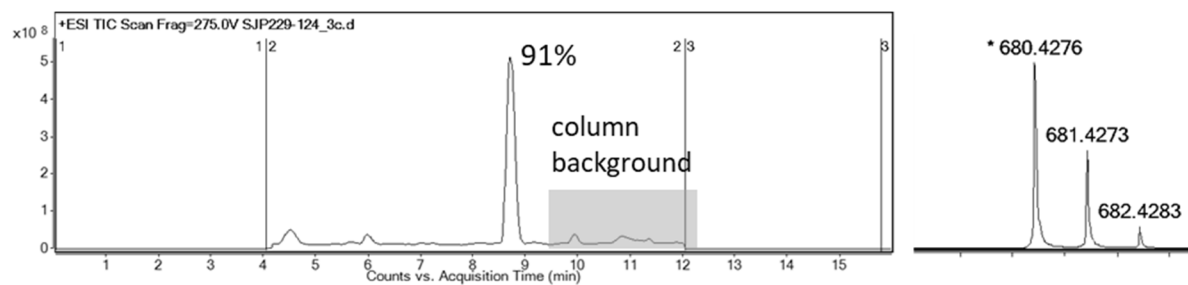

### Nucleobase peptide 32

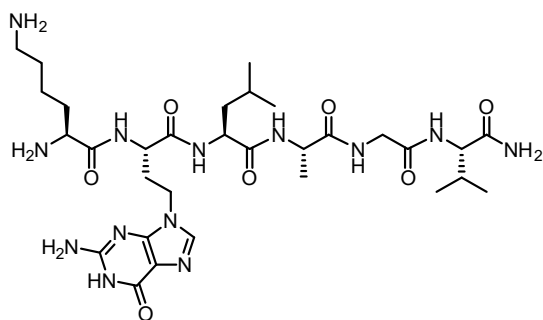

HRMS (SI-QToF)  $m/z$ :  $[M+H]^+$  calcd. 720.427 found 720.430

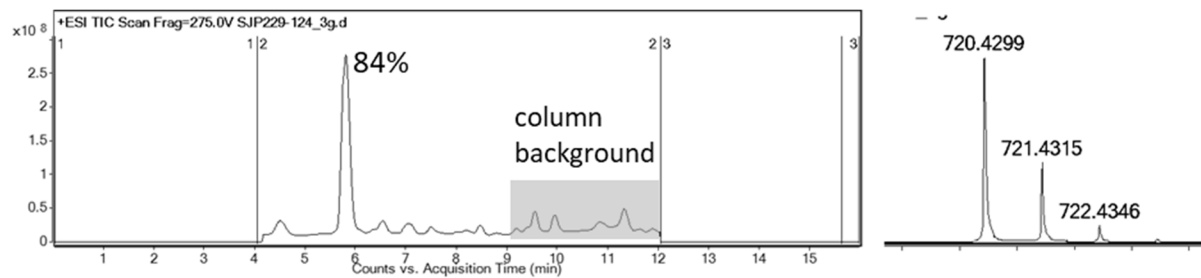

### Nucleobase peptide 33

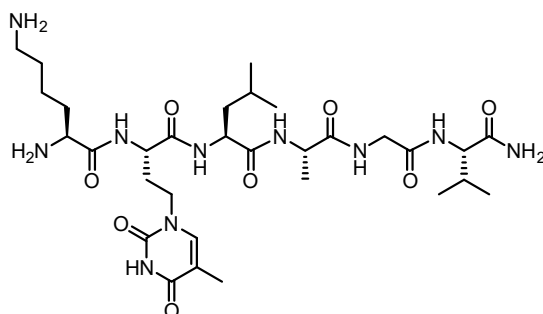

HRMS (SI-QToF)  $m/z$ :  $[M+H]^+$  calcd. 695.420 found 695.424

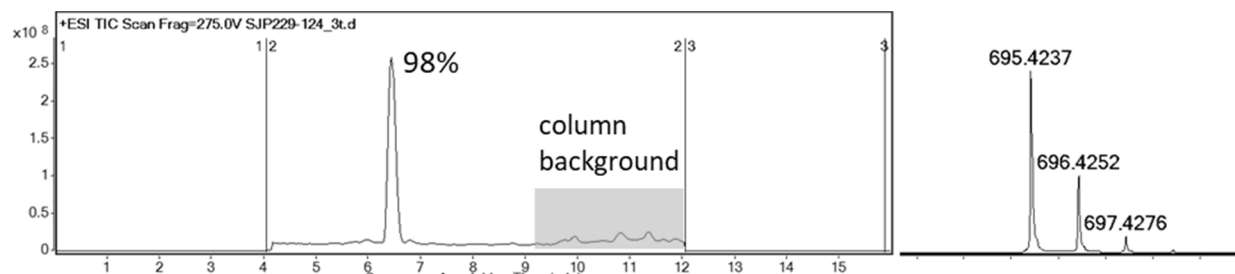

### Nucleobase peptide 34

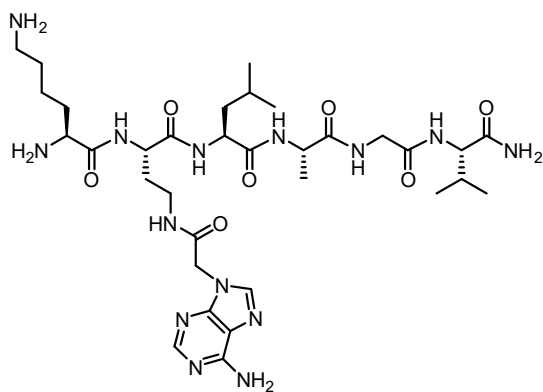

HRMS (SI-QToF)  $m/z$ :  $[M+H]^+$  calcd. 761.454 found 761.454

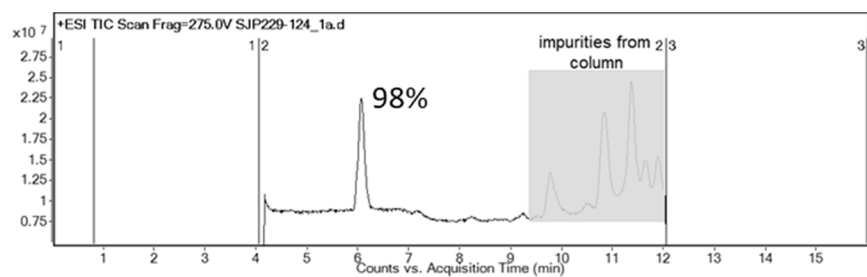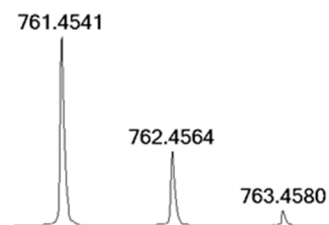

### Nucleobase peptide 35

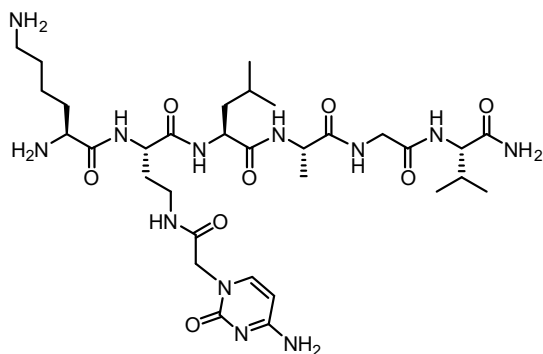

HRMS (SI-QToF)  $m/z$ :  $[M+H]^+$  calcd. 737.442 found 737.444

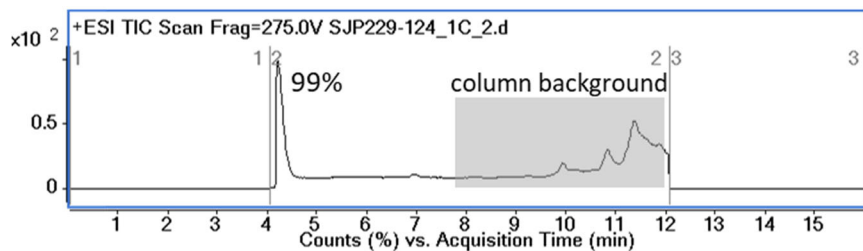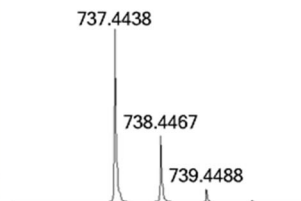

### Nucleobase peptide 36

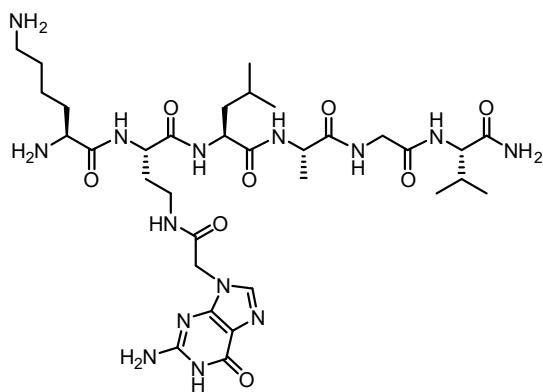

HRMS (SI-QToF)  $m/z$ :  $[M+H]^+$  calcd. 777.448 found 777.449

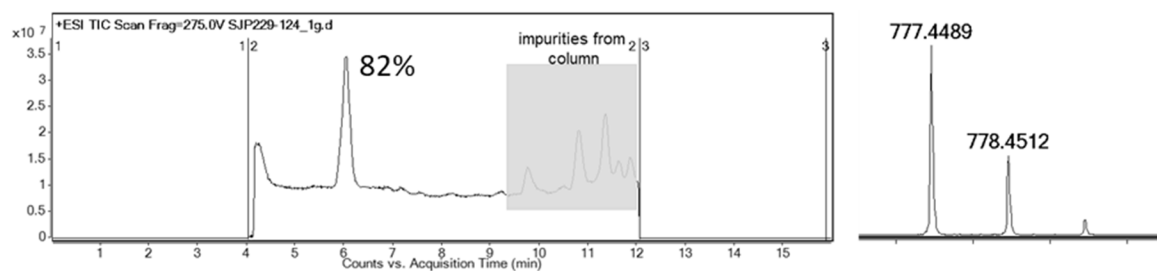

### Nucleobase peptide 37

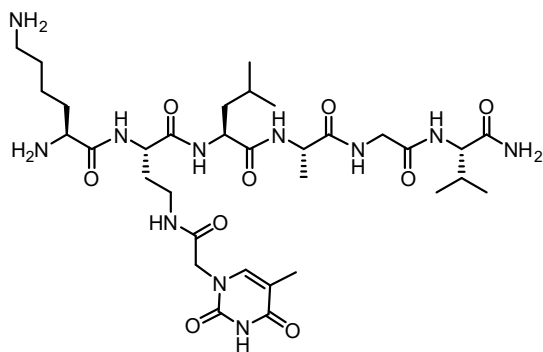

HRMS (SI-QToF)  $m/z$ :  $[M+H]^+$  calcd. 752.442 found 752.447

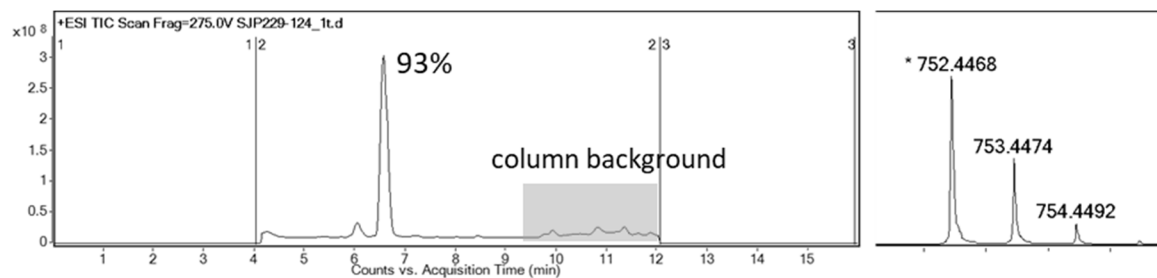

### Peptide 38

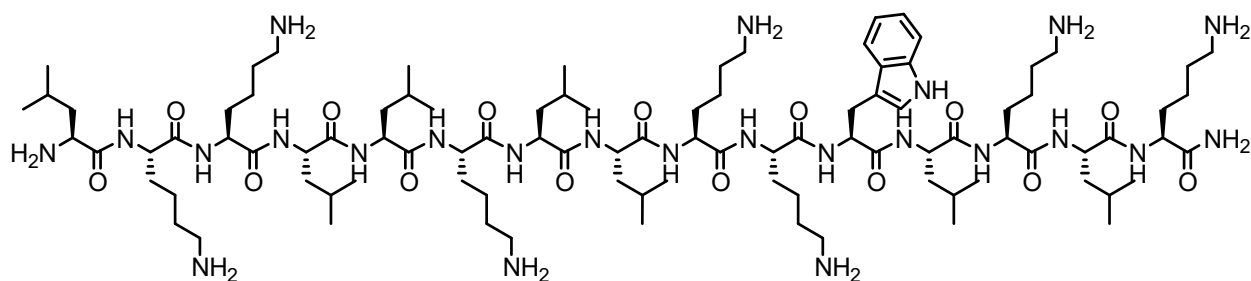

HRMS (SI-QToF)  $m/z$ :  $[M+H]^+$  calcd. 1892.37 found 1892.44

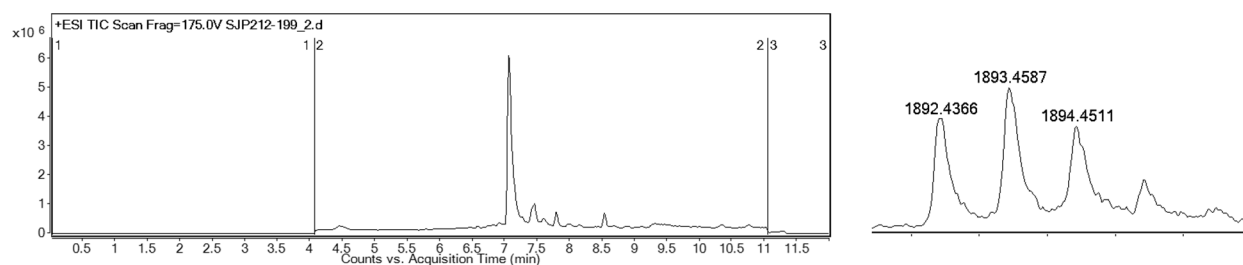

### 38 Biotin

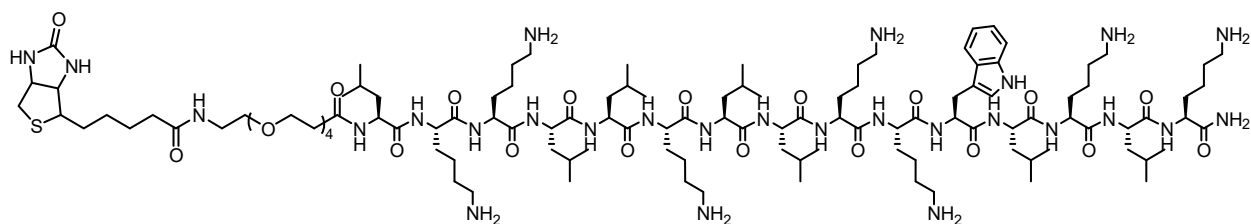

HRMS (SI-QToF)  $m/z$ :  $[M+5H]^{5+}$  calcd. 473.924 found 473.926

$[M+4H]^{4+}$  calcd. 592.153 found 591.154

$[M+3H]^{3+}$  calcd. 789.201 found 780.201

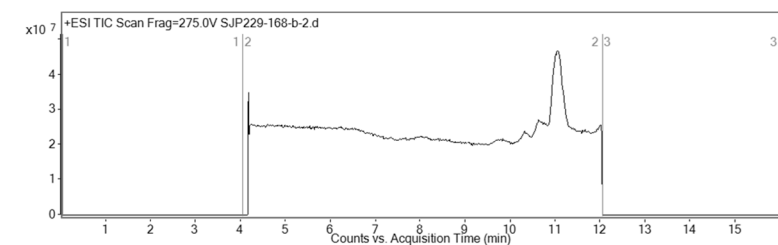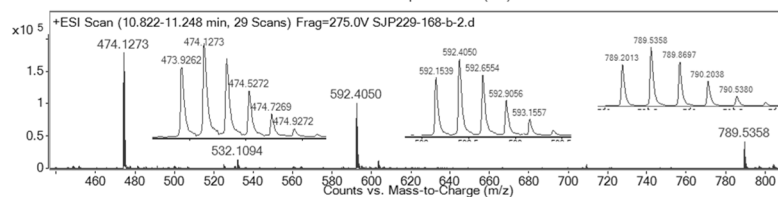

### Nucleobase peptide 39

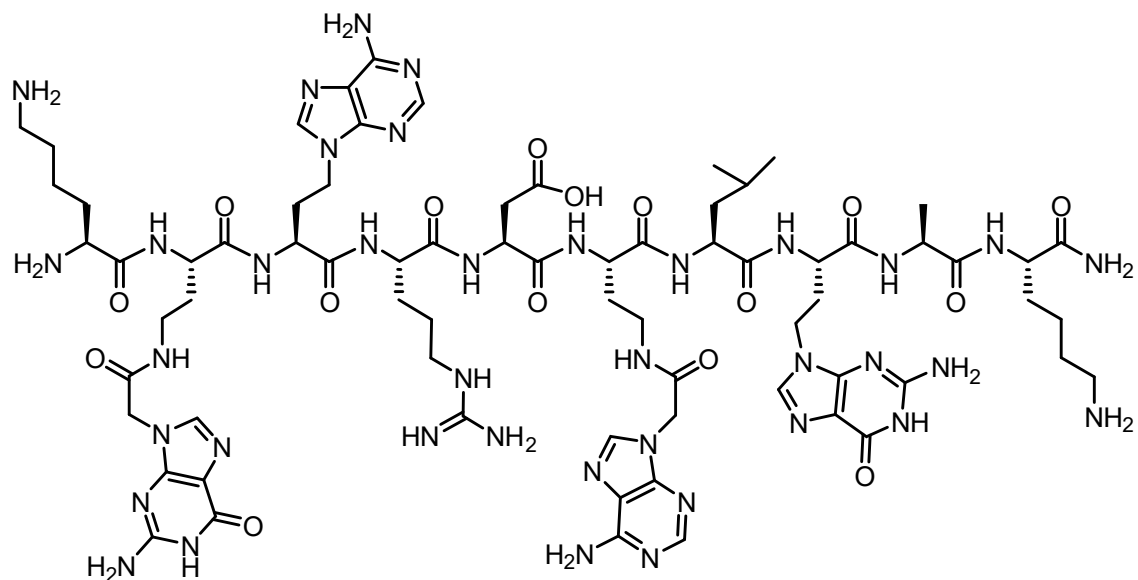

**HRMS (SI-QToF)  $m/z$ :**  $[M+5H]^{4+}$  calcd. 350.381 found 350.382

$[M+4H]^{4+}$  calcd. 437.724 found 437.726

$[M+3H]^{3+}$  calcd. 583.296 found 583.297

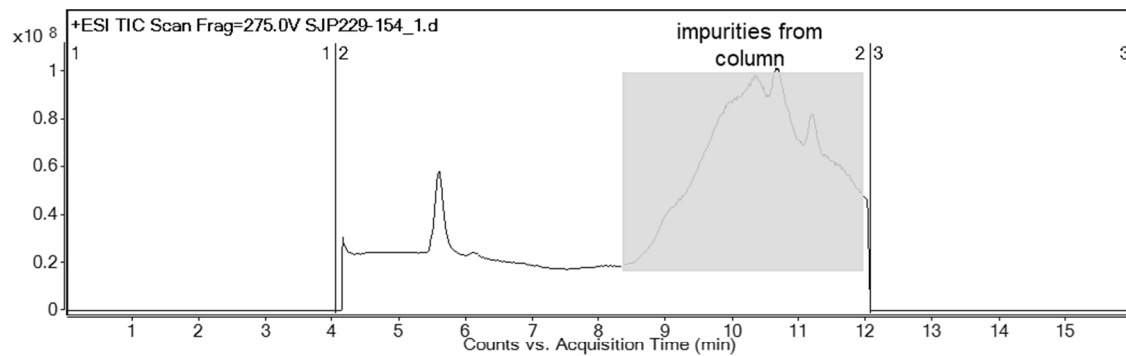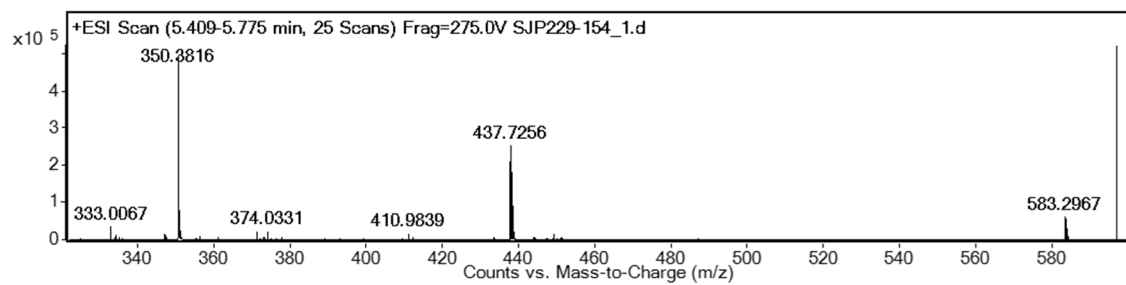

**Nucleobase peptide 40**

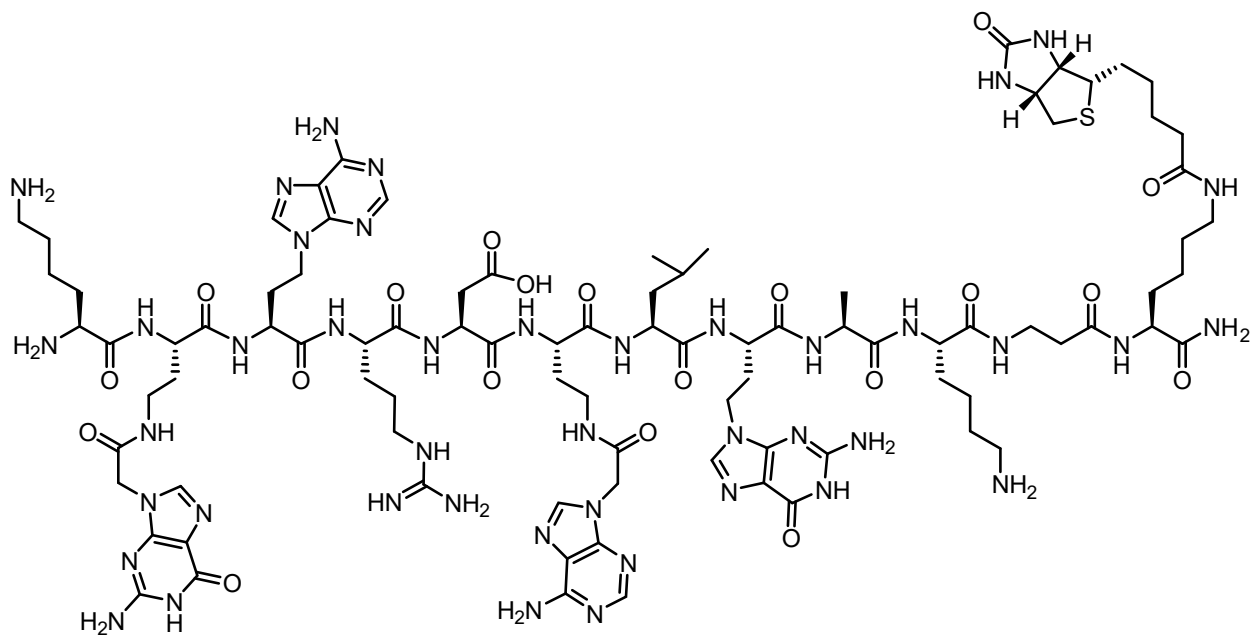

**HRMS (SI-QToF)  $m/z$ :** [M+5H]<sup>5+</sup> calcd. 435.423 found 435.421  
 [M+4H]<sup>4+</sup> calcd. 544.027 found 544.024  
 [M+3H]<sup>3+</sup> calcd. 725.0326 found 725.030  
 [M+2H]<sup>2+</sup> calcd. 1087.04 found 1087.04

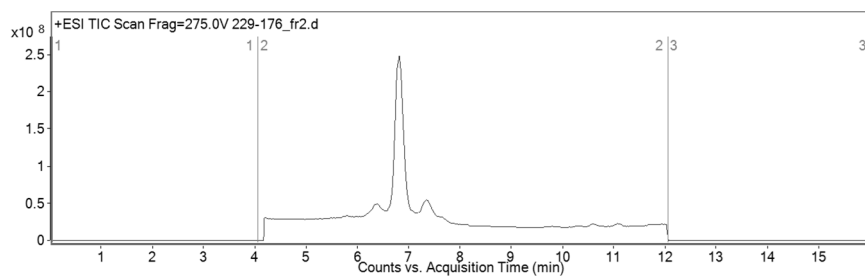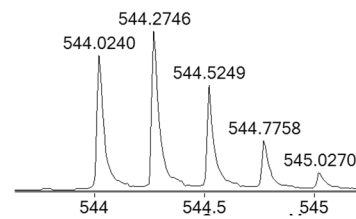

## Alanine scan

Original sequence: 39Biotin

Lys – DabG – hAlaA – Arg – Asp -DabA – Leu -DabG – Ala – Lys – bAla – Lys(Biotin)-CONH<sub>2</sub>

Nucleobase peptides were synthesized according to the general SPPS procedure, cleaved and used without further purification. Main product in each chromatogram is indicated with \*.

### AlaScan-1:

**Ala** – DabG – hAlaA – Arg – Asp -DabA – Leu -hAlaG – Ala – Lys – βAla – Lys(Biotin)-CONH<sub>2</sub>

HRMS (SI-QToF)  $m/z$ : [M+4H]<sup>4+</sup> calcd. 529.762 found 529.762

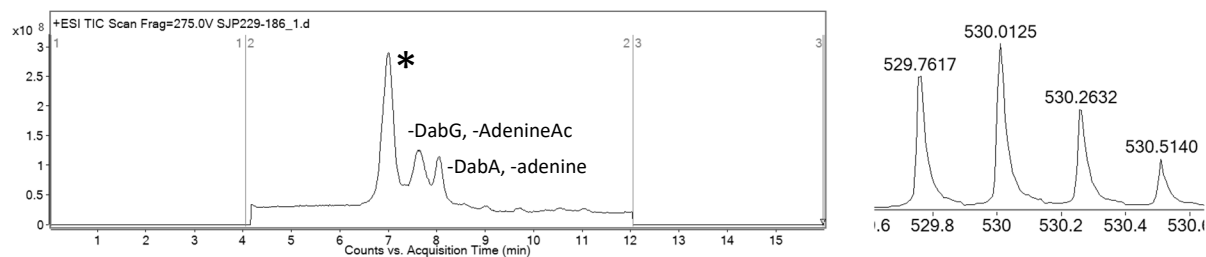

### AlaScan-2:

Lys – **Ala** – hAlaA – Arg – Asp -DabA – Leu - hAlaG – Ala – Lys – βAla – Lys(Biotin)-CONH<sub>2</sub>

HRMS (SI-QToF)  $m/z$ : [M+4H]<sup>4+</sup> calcd. 489.009 found 489.010

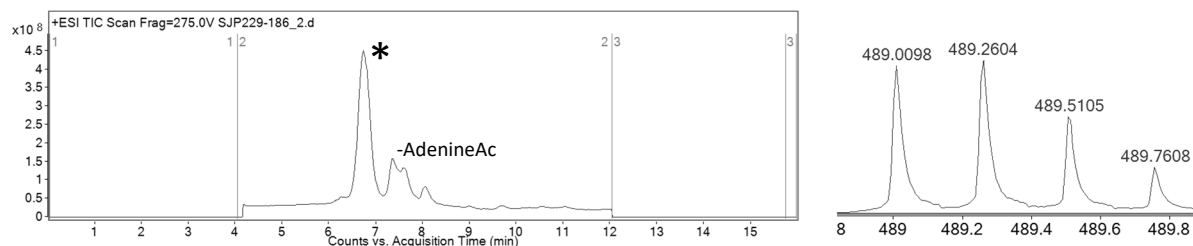

### AlaScan-3:

Lys – DabG – **Ala** – Arg – Asp -DabA – Leu - hAlaG – Ala – Lys – βAla – Lys(Biotin)-CONH<sub>2</sub>

HRMS (SI-QToF)  $m/z$ : [M+4H]<sup>4+</sup> calcd. 507.263 found 507.264

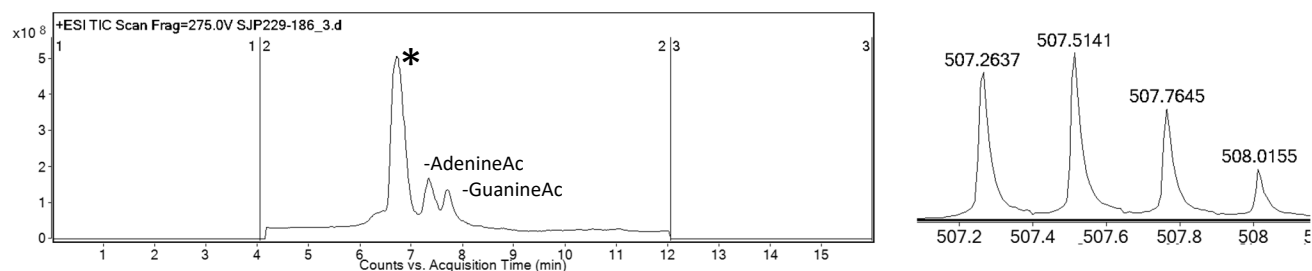



### AlaScan-4:

Lys – DabG – hAlaA – **Ala** – Asp – DabA – Leu – hAlaG – Ala – Lys – βAla – Lys(Biotin)-CONH<sub>2</sub>

HRMS (SI-QToF)  $m/z$ : [M+4H]<sup>4+</sup> calcd. 522.761 found 522.762

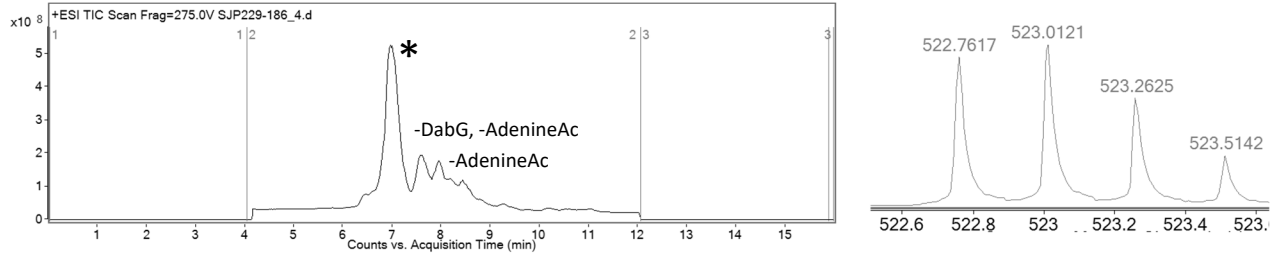

### AlaScan-5:

Lys – DabG – hAlaA – Arg – **Ala** – DabA – Leu – hAlaG – Ala – Lys – βAla – Lys(Biotin)-CONH<sub>2</sub>

HRMS (SI-QToF)  $m/z$ : [M+5H]<sup>5+</sup> calcd. 426.625 found 426.626

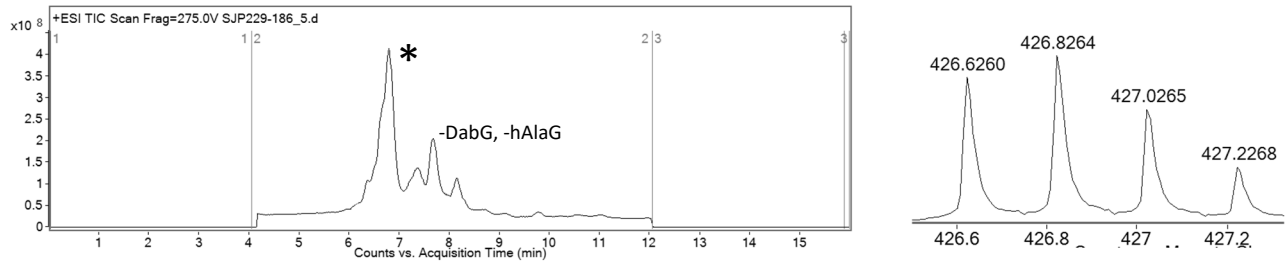

### AlaScan-6:

Lys – DabG – hAlaA – Arg – Asp – **Ala** – Leu – hAlaG – Ala – Lys – βAla – Lys(Biotin)-CONH<sub>2</sub>

HRMS (SI-QToF)  $m/z$ : [M+4H]<sup>4+</sup> calcd. 493.008 found 493.009

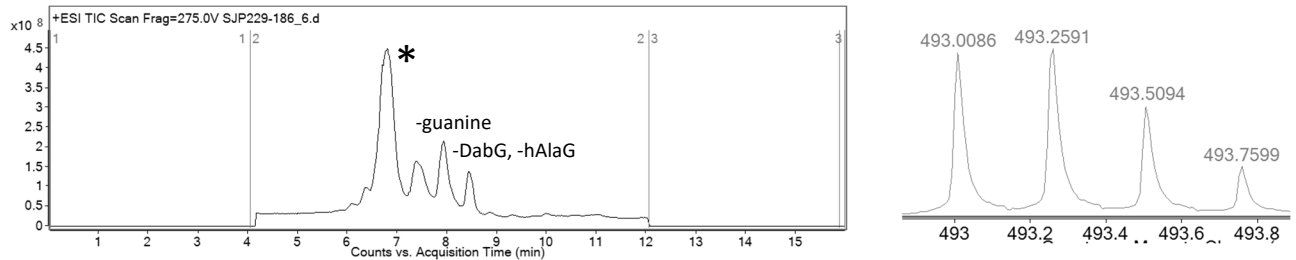

**AlaScan-7:**

Lys – DabG – hAlaA – Arg – Asp -DabA – **Ala** - hAlaG – Ala – Lys – βAla – Lys(Biotin)-CONH<sub>2</sub>

**HRMS (SI-QToF)  $m/z$ : [M+4H]<sup>4+</sup> found 533.766**

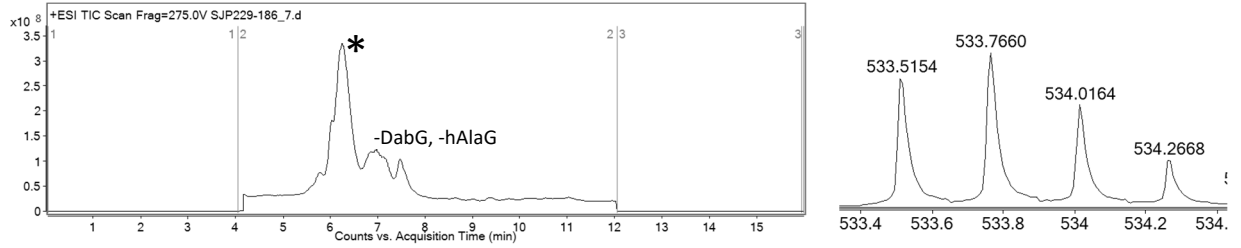

**AlaScan-8:**

Lys – DabG – hAlaA – Arg – Asp -DabA – Leu - **Ala** – Ala – Lys – βAla – Lys(Biotin)-CONH<sub>2</sub>

**HRMS (SI-QToF)  $m/z$ : [M+4H]<sup>4+</sup> calcd. 503.264 found 503.265**

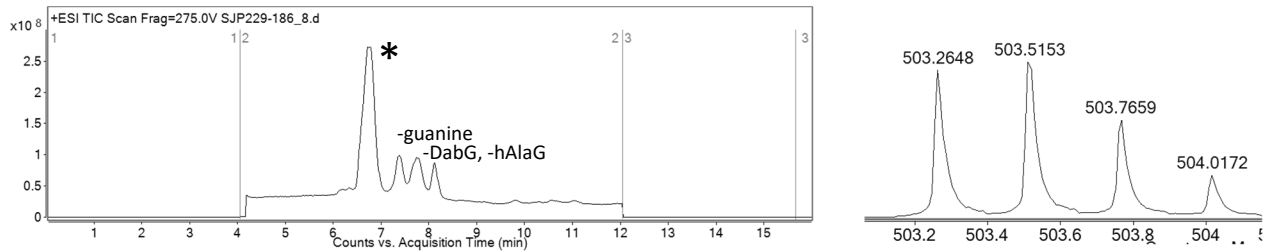

**AlaScan-9:**

Lys – DabG – hAlaA – Arg – Asp -DabA – Leu - hAlaG – Ala – **Ala** – βAla – Lys(Biotin)-CONH<sub>2</sub>

**HRMS (SI-QToF)  $m/z$ : [M+4H]<sup>4+</sup> calcd. 526.762 found 526.763**

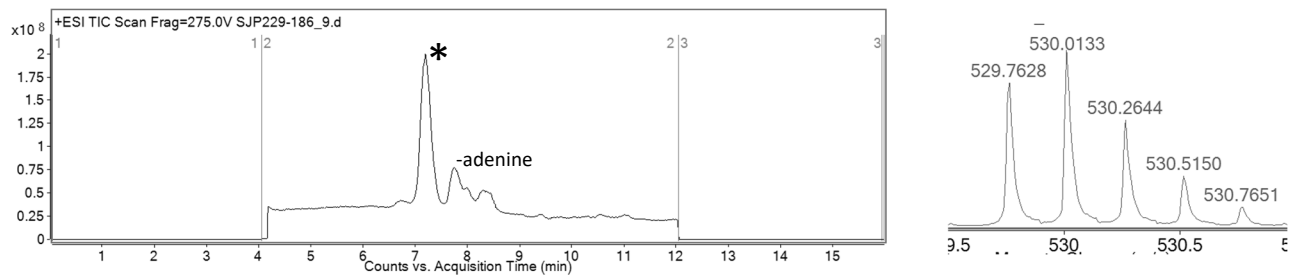

## Mutation of all 4 nucleobases

Original sequence: 39

Lys – DabG – hAlaA – Arg – Asp -DabA – Leu -DabG – Ala – Lys – bAla – Lys(Biotin)-CONH<sub>2</sub>

Peptides were synthesized according to the general SPPS procedure, cleaved and used without further purification

### Tetra-Ala-mutant

Lys – **Ala** – **Ala** – Arg – Asp - **Ala** – Leu - **Ala** – Ala – Lys – bAla – Lys(Biotin)-CONH<sub>2</sub>

HRMS (SI-QToF)  $m/z$ : [M+4H]<sup>4+</sup> calcd. 360.464 found 360.265

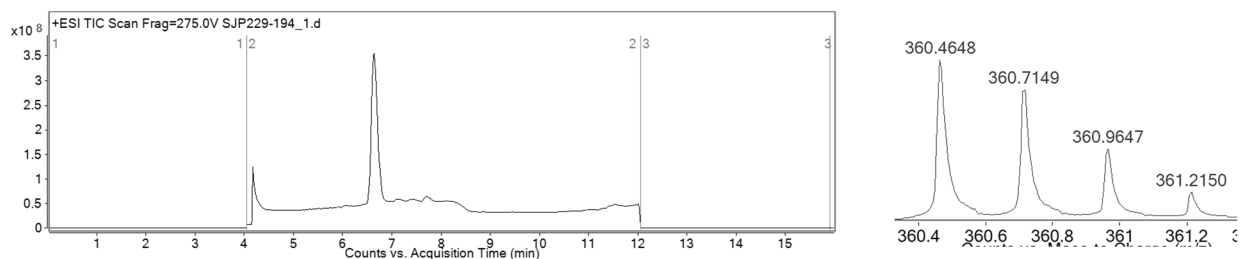

### Tetra-Trp-mutant

Lys – **Trp** – **Trp** – Arg – Asp - **Trp** – Leu - **Trp** – Ala – Lys – bAla – Lys(Biotin)-CONH<sub>2</sub>

HRMS (SI-QToF)  $m/z$ : [M+4H]<sup>4+</sup> calcd. 475.509 found 475.506

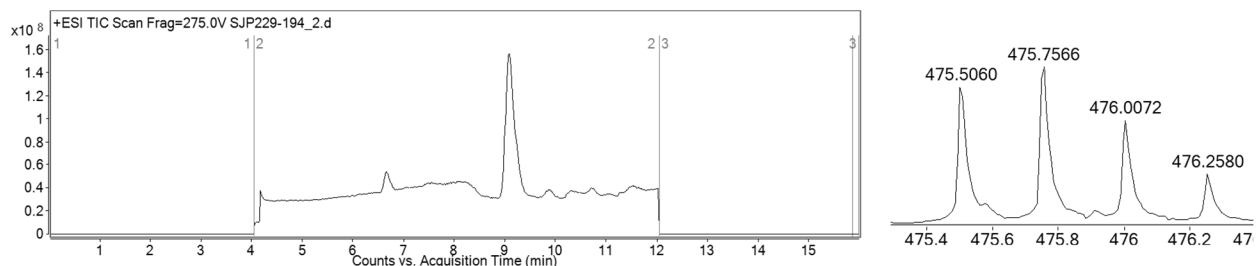

### Tetra-Gln-mutant

Lys – **Gln** – **Gln** – Arg – Asp - **Gln** – Leu - **Gln** – Ala – Lys – bAla – Lys(Biotin)-CONH<sub>2</sub>

HRMS (SI-QToF)  $m/z$ : [M+4H]<sup>4+</sup> calcd. 417.485 found 417.485

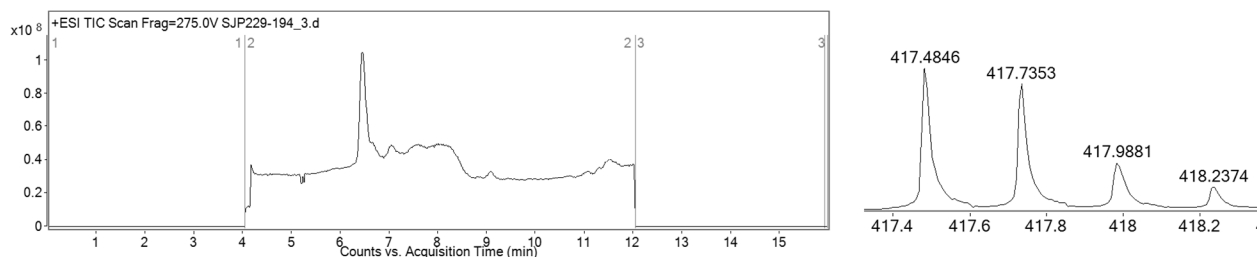

## Synthesis and de novo sequencing of three nucleobase peptide test libraries

**Procedure for split-and-pool synthesis of three nucleobase peptide test libraries (Alanyl library, homoalanyl library and Dab library):** Coupling and Fmoc deprotection steps were performed according to the stoichiometries and procedures described above. Monosized Tentagel beads (90  $\mu\text{m}$  diameter and loading 0.26 mmol/g, 100 mg for each library), were loaded into a peptide synthesis vessel, swollen in DMF and then coupled to Fmoc-Rink Amide linker. For variable positions the resin was suspended in DMF divided in equal aliquots in fritted syringes, coupled to the respective Fmoc amino acid and then pooled back into the peptide synthesis vessel before Fmoc deprotection. After completion of the synthesis the libraries were cleaved according to the general cleavage procedure described above and purified by solid phase extraction.

**Sequencing of nucleobase peptide test libraries:** Stock solutions of each of the three libraries were prepared (1 mM in 6 M guanidine-HCl, pH = 6.8). Prior to injection to the Orbitrap lumos for nanoLC-MS/MS analysis, the solutions were diluted to 12.8  $\mu\text{M}$  solutions in guanidine-HCl (1 M, pH = 6.8). 1  $\mu\text{L}$ , containing 12.8 pmol library, i.e. 50 fmol per individual member, was injected.

**De novo sequencing with PEAKS and further filtering:** *De novo* peptide sequencing was performed in PEAKS 8.5 from Bioinformatics Solutions Inc. (ON, Canada). *De novo* sequencing was performed allowing 15 ppm assignment errors and 0.05 Da individual fragment mass errors. The nucleobase monomers were selected as variable PTMs (indicated as alanine +  $\Delta\text{MS}$ ). 15 candidate sequences were obtained for each preprocessed scan. The complete list of peptide candidates was exported as .csv file and then filtered using a Python script.<sup>9</sup> Briefly: sequences not matching library design rules (sequence length, correct monomers in every position) were eliminated from further consideration. Next, for scans with multiple remaining sequence candidates, a single peptide with highest ALC (average level of confidence) score per scan was retained, while the rest were excluded. After this, remaining sequences were labeled as “unique” and “non-unique” based on retention time, mass, and sequence similarity criteria. The resulting final list of unique sequences was used for analysis of the sequencing performance of nucleobase peptide libraries containing 0 – 4 nucleobase monomers.

## Test libraries for sequencing validation

### Library 1 design:

|     |      |     |      |      |     |      |     |     |
|-----|------|-----|------|------|-----|------|-----|-----|
| 1   | 2    | 3   | 4    | 5    | 6   | 7    | 8   | 9   |
| Ala | AlaC | Phe | AlaT | AlaG | Trp | AlaA | Tyr | Lys |
| Ser | His  | Leu | Arg  | Gln  | Pro | Glu  | Asn |     |

### Full lists of unique sequences for the test library with alanyl nucleobase monomers

*U = C-terminal amide, B = AlaA, J = AlaC, X = AlaG, Z = AlaT*

| Peptide    | ALC (%) | m/z      | z | RT    | Mass     | ppm  |
|------------|---------|----------|---|-------|----------|------|
| AHFRQPEYKU | 99      | 392.2073 | 3 | 20.23 | 1173.604 | -3.6 |
| SHFRQWENKU | 99      | 410.8744 | 3 | 20.24 | 1229.606 | -3.4 |
| AHFRQWENKU | 99      | 405.5424 | 3 | 20.53 | 1213.61  | -4.2 |
| SJLRQWENKU | 99      | 413.8813 | 3 | 21.03 | 1238.627 | -3.6 |
| AJLRQWENKU | 99      | 408.5499 | 3 | 21.6  | 1222.632 | -3.3 |
| SJFRQWBNKU | 99      | 450.2203 | 3 | 21.84 | 1347.645 | -4.1 |
| AHLZQPBYKU | 99      | 418.8782 | 3 | 22.96 | 1253.617 | -2.9 |
| SJFRQWENKU | 99      | 425.2093 | 3 | 23.39 | 1272.611 | -3.9 |
| AJFRQWENKU | 99      | 419.8784 | 3 | 24.29 | 1256.616 | -2.2 |
| SHLRQWEYKU | 99      | 415.8866 | 3 | 24.55 | 1244.641 | -2.7 |
| SHLZQWBNKU | 99      | 437.5447 | 3 | 24.64 | 1309.618 | -4.2 |
| AHLZQWBNKU | 99      | 432.2132 | 3 | 25.16 | 1293.623 | -4   |
| AHLRQWEYKU | 99      | 410.5546 | 3 | 25.38 | 1228.647 | -3.8 |
| AHFZQPBYKU | 99      | 430.2061 | 3 | 25.75 | 1287.601 | -3.3 |
| SHLZQWENKU | 99      | 412.5336 | 3 | 26.64 | 1234.584 | -4.2 |
| SHFZQWBNKU | 99      | 448.8734 | 3 | 26.87 | 1343.602 | -2.7 |
| AHLZQWENKU | 99      | 407.2019 | 3 | 27.18 | 1218.589 | -4.6 |
| AJLRQWBYKU | 99      | 449.9003 | 3 | 27.52 | 1346.686 | -4.8 |
| AHFZQWBNKU | 99      | 443.5416 | 3 | 27.77 | 1327.607 | -3.1 |
| AHFZQPEYKU | 99      | 405.195  | 3 | 27.94 | 1212.568 | -3.6 |
| SHFRQWEYKU | 99      | 427.2143 | 3 | 28.51 | 1278.626 | -3.7 |
| SJLZQWBNKU | 99      | 451.8797 | 3 | 28.74 | 1352.624 | -4.7 |
| SJLRQWEYKU | 99      | 430.2217 | 3 | 29.22 | 1287.647 | -3   |
| SHFZQWENKU | 99      | 423.8618 | 3 | 29.55 | 1268.569 | -3.9 |
| AHFRQWEYKU | 99      | 421.8823 | 3 | 29.95 | 1262.631 | -4.5 |
| SJFRQWBYKU | 99      | 466.5596 | 3 | 30.31 | 1396.665 | -5.5 |
| AJLRQWEYKU | 99      | 424.8893 | 3 | 30.62 | 1271.652 | -4.8 |
| SJFZQWBNKU | 99      | 463.208  | 3 | 31.38 | 1386.608 | -4.1 |
| SJLZQWENKU | 99      | 639.7998 | 2 | 31.53 | 1277.59  | -3.9 |
| AJLRXWEYKU | 99      | 455.5602 | 3 | 31.6  | 1363.665 | -4.3 |
| AJFRQWBYKU | 99      | 461.228  | 3 | 31.81 | 1380.67  | -5.7 |

|            |    |          |   |       |          |      |
|------------|----|----------|---|-------|----------|------|
| AJFZQWBNKU | 99 | 457.8764 | 3 | 32.49 | 1370.613 | -3.9 |
| SJFRQWEYKU | 99 | 441.5495 | 3 | 33.54 | 1321.632 | -3.8 |
| SHLZQWBYKU | 99 | 453.8848 | 3 | 34.86 | 1358.638 | -3.9 |
| SJFZQWENKU | 99 | 656.7924 | 2 | 34.98 | 1311.575 | -3.3 |
| AJFRQWEYKU | 99 | 436.2178 | 3 | 35.32 | 1305.637 | -3.9 |
| AHLZQWBYKU | 99 | 448.5523 | 3 | 35.58 | 1342.643 | -5.9 |
| SHFZQWBYKU | 99 | 465.2137 | 3 | 37.81 | 1392.622 | -2.2 |
| SHLZQWEYKU | 99 | 428.8737 | 3 | 38.51 | 1283.605 | -4.2 |
| AHFZQWBYKU | 99 | 459.8812 | 3 | 38.9  | 1376.627 | -4.2 |
| AHLZQWEYKU | 99 | 423.5423 | 3 | 39.32 | 1267.61  | -3.7 |
| SJLZQWBYKU | 99 | 468.2197 | 3 | 39.44 | 1401.644 | -4.7 |
| AJLZQWBYKU | 99 | 462.8878 | 3 | 40.55 | 1385.649 | -5.3 |
| SHFZQWEYKU | 99 | 440.2021 | 3 | 41.53 | 1317.589 | -3.4 |
| SJFZQWBYKU | 99 | 479.5491 | 3 | 42.37 | 1435.628 | -1.8 |
| AHFZQWEYKU | 99 | 434.8698 | 3 | 42.57 | 1301.594 | -5.2 |
| SJLZQWEYKU | 99 | 664.3096 | 2 | 43.13 | 1326.611 | -4.5 |
| AJFZQWBYKU | 99 | 474.2161 | 3 | 43.73 | 1419.633 | -4.8 |
| AHFZXWEYKU | 99 | 465.5404 | 3 | 44.47 | 1393.606 | -5   |
| SJFZQWEYKU | 99 | 681.303  | 2 | 46.21 | 1360.595 | -2.5 |
| SJFZXWEYKU | 99 | 485.2071 | 3 | 48.21 | 1452.607 | -5.3 |
| AJFZXWEYKU | 99 | 479.8765 | 3 | 49.81 | 1436.612 | -3.2 |
| AJLRQWBNKU | 98 | 433.5605 | 3 | 20.41 | 1297.665 | -4.2 |
| SJFRQPEYKU | 98 | 411.8741 | 3 | 21.48 | 1232.605 | -3.5 |
| SHFRXWENKU | 98 | 441.545  | 3 | 21.5  | 1321.618 | -3.3 |
| SHLRQWBYKU | 98 | 330.9247 | 4 | 23.36 | 1319.675 | -3.8 |
| SJFRXWENKU | 98 | 455.8802 | 3 | 23.93 | 1364.623 | -3.3 |
| AHLRQWBYKU | 98 | 326.9265 | 4 | 24.05 | 1303.68  | -2.5 |
| SHFRQWBYKU | 98 | 339.421  | 4 | 26.36 | 1353.659 | -3.2 |
| AHLRXWEYKU | 98 | 441.2252 | 3 | 27.42 | 1320.659 | -3.7 |
| AHLZXWENKU | 98 | 437.8726 | 3 | 29.07 | 1310.602 | -4.2 |
| AHFZXWBNKU | 98 | 474.2122 | 3 | 31.42 | 1419.619 | -3.3 |
| SJFZQPBNKU | 97 | 433.5331 | 3 | 19.93 | 1297.581 | -3.1 |
| SJLRQWBNKU | 97 | 438.8925 | 3 | 20    | 1313.66  | -3.5 |
| AHLRQWENKU | 97 | 394.2144 | 3 | 20.25 | 1179.626 | -4   |
| SHLRQWENKU | 97 | 399.5461 | 3 | 20.28 | 1195.621 | -3.8 |
| AHFRXWENKU | 97 | 436.2132 | 3 | 21.84 | 1305.623 | -3.9 |
| AJFZQWENKU | 97 | 432.8656 | 3 | 36.22 | 1295.58  | -3.6 |
| AJFRQPEYKU | 96 | 406.5425 | 3 | 22.41 | 1216.61  | -3.6 |
| AJFRQWBNKU | 96 | 333.9187 | 4 | 22.53 | 1331.65  | -3   |
| AHFZQWENKU | 96 | 627.2914 | 2 | 30.32 | 1252.574 | -4.4 |
| SHFZXWBNKU | 96 | 479.5428 | 3 | 30.83 | 1435.614 | -5.3 |
| SHLZQPBYKU | 95 | 424.2096 | 3 | 22.31 | 1269.612 | -3.7 |
| SJLRXWBYKU | 95 | 485.9024 | 3 | 30.22 | 1454.693 | -5.1 |
| AJFZXWBYKU | 95 | 504.8872 | 3 | 47.35 | 1511.646 | -3.8 |
| SHFRQPEYKU | 94 | 397.5391 | 3 | 19.44 | 1189.599 | -3   |

|            |    |          |   |       |          |      |
|------------|----|----------|---|-------|----------|------|
| AHFRQWBNKU | 94 | 323.167  | 4 | 20.29 | 1288.644 | -3.7 |
| SJFRXWBYKU | 94 | 497.2317 | 3 | 34.13 | 1488.677 | -2.7 |
| AJLZXWENKU | 94 | 452.2083 | 3 | 34.24 | 1353.607 | -3.3 |
| SJLRQPEYKU | 93 | 400.5462 | 3 | 19.27 | 1198.621 | -3.2 |
| AHFRQWBYKU | 93 | 335.4222 | 4 | 27.91 | 1337.664 | -3.1 |
| AJFZQPEYKU | 93 | 419.5298 | 3 | 31.28 | 1255.574 | -4.7 |
| AJLRQPBYKU | 92 | 420.2255 | 3 | 19.68 | 1257.659 | -3.5 |
| SHFRQWBNKU | 92 | 435.8854 | 3 | 20.15 | 1304.639 | -3.2 |
| SHFRXWEYKU | 92 | 457.8847 | 3 | 30.65 | 1370.638 | -4.2 |
| SJLZQPBNKU | 91 | 422.205  | 3 | 18.5  | 1263.597 | -3   |
| AHFRQPBYKU | 91 | 417.2186 | 3 | 19.91 | 1248.638 | -3.1 |
| AJLRXWBYKU | 91 | 480.5711 | 3 | 31.21 | 1438.698 | -4.4 |
| AJLZQWENKU | 91 | 421.5368 | 3 | 32.63 | 1261.595 | -5.2 |
| AJLZXWBNKU | 91 | 477.219  | 3 | 33.53 | 1428.641 | -4   |
| AJFZXWBNKU | 91 | 488.5471 | 3 | 37.26 | 1462.625 | -3.7 |
| AHFZXWBYKU | 91 | 490.5526 | 3 | 42.25 | 1468.64  | -2.4 |
| SJLRQWBYKU | 90 | 455.2324 | 3 | 26.23 | 1362.681 | -3.9 |
| SHFRXWBYKU | 89 | 362.4234 | 4 | 30.09 | 1445.671 | -4.7 |
| SJLZXWEYKU | 89 | 473.8788 | 3 | 44.8  | 1418.623 | -5.8 |
| AJLZXWEYKU | 89 | 468.5476 | 3 | 46.29 | 1402.628 | -4.9 |
| AHLZQPEYKU | 88 | 393.8673 | 3 | 24.38 | 1178.583 | -2.7 |
| AJFRXWENKU | 88 | 450.5482 | 3 | 24.77 | 1348.628 | -4.1 |
| SHFZXWENKU | 88 | 454.5331 | 3 | 32.15 | 1360.581 | -2.6 |
| SHFZQPENKU | 87 | 394.1866 | 3 | 18.3  | 1179.542 | -3.7 |
| SJFZQPENKU | 87 | 612.2793 | 2 | 20.25 | 1222.548 | -3.1 |
| SHFRXWBNKU | 87 | 350.1688 | 4 | 21.74 | 1396.651 | -3.4 |
| SJFZQPBYKU | 87 | 449.8728 | 3 | 28.18 | 1346.602 | -3.8 |
| AHFZXWENKU | 87 | 449.2008 | 3 | 32.61 | 1344.586 | -4   |
| AHLZXWEYKU | 87 | 454.212  | 3 | 40.39 | 1359.622 | -5.7 |
| AJLZQPBYKU | 86 | 433.2135 | 3 | 25.88 | 1296.622 | -2.9 |
| SJFRQPBYKU | 85 | 436.885  | 3 | 20.75 | 1307.638 | -4   |
| AHFRXWEYKU | 85 | 452.5527 | 3 | 32.04 | 1354.643 | -5.1 |
| AJFRXWBNKU | 84 | 475.5592 | 3 | 24.76 | 1423.662 | -4.2 |
| SHLZXWBNKU | 83 | 468.2159 | 3 | 28.33 | 1401.63  | -3   |
| SHLRXWEYKU | 82 | 335.1698 | 4 | 26.89 | 1336.654 | -2.7 |
| SJLRXWEYKU | 82 | 460.8914 | 3 | 30.43 | 1379.659 | -5.1 |
| AJLZQPBNKU | 81 | 416.8732 | 3 | 18.83 | 1247.602 | -3.4 |
| SJFZXWENKU | 81 | 468.8677 | 3 | 37.11 | 1403.587 | -3.8 |
| AHLRXWBYKU | 80 | 349.9289 | 4 | 27.35 | 1395.692 | -4.1 |
| AHLZXWBYKU | 80 | 479.2242 | 3 | 39.99 | 1434.655 | -3.1 |
| AHFZQPBNKU | 79 | 413.8662 | 3 | 18.74 | 1238.581 | -3   |
| AHFZQPENKU | 78 | 582.7794 | 2 | 18.6  | 1163.547 | -2.4 |
| SHFZQPEYKU | 78 | 615.2871 | 2 | 26.94 | 1228.563 | -2.3 |
| SJLRQPBYKU | 77 | 425.5573 | 3 | 19.31 | 1273.654 | -3   |
| SHFRQPBYKU | 77 | 317.1642 | 4 | 19.49 | 1264.633 | -3.7 |

|                   |    |          |   |       |          |      |
|-------------------|----|----------|---|-------|----------|------|
| <b>SJLZXWBNKU</b> | 77 | 482.5512 | 3 | 32.75 | 1444.636 | -2.7 |
| <b>AJFRXWBYKU</b> | 77 | 491.8991 | 3 | 35.27 | 1472.682 | -4.4 |
| <b>AHFRXWBNKU</b> | 76 | 346.1701 | 4 | 22.11 | 1380.656 | -3.5 |
| <b>AHFRXWBYKU</b> | 76 | 358.4248 | 4 | 30.92 | 1429.677 | -4.6 |
| <b>AJLZQWEYKU</b> | 73 | 437.8772 | 3 | 44.23 | 1310.616 | -4.6 |
| <b>AHLRXPEYKU</b> | 72 | 411.55   | 3 | 19.23 | 1231.632 | -3.1 |
| <b>SHFZXWEYKU</b> | 72 | 470.8728 | 3 | 43.37 | 1409.601 | -3.4 |
| <b>AHLZXWBNKU</b> | 71 | 462.8836 | 3 | 28.82 | 1385.635 | -4.4 |
| <b>SJFZXWBYKU</b> | 71 | 510.219  | 3 | 45.95 | 1527.64  | -3.5 |
| <b>SHLZQPEYKU</b> | 70 | 399.1988 | 3 | 23.75 | 1194.578 | -3   |
| <b>SHLZXWEYKU</b> | 70 | 459.5446 | 3 | 40.68 | 1375.617 | -3.7 |
| <b>SHLZXWBYKU</b> | 69 | 484.555  | 3 | 39.05 | 1450.65  | -4.9 |
| <b>AJFZQWEYKU</b> | 69 | 449.205  | 3 | 47.58 | 1344.6   | -5.1 |
| <b>AJFZQPBNKU</b> | 66 | 428.2007 | 3 | 20.5  | 1281.586 | -4.8 |
| <b>AJFRQPBYKU</b> | 64 | 431.5538 | 3 | 21.17 | 1291.643 | -3   |
| <b>AJLZQPENKU</b> | 63 | 587.2904 | 2 | 18.66 | 1172.569 | -2   |
| <b>AJFZXWENKU</b> | 63 | 463.5359 | 3 | 38.39 | 1387.592 | -4.4 |
| <b>SJFRXWEYKU</b> | 61 | 472.2193 | 3 | 35.13 | 1413.644 | -5.5 |
| <b>SHFRQPENKU</b> | 59 | 571.2955 | 2 | 56.72 | 1140.579 | -2.2 |
| <b>AJLRXWENKU</b> | 58 | 439.2203 | 3 | 21.98 | 1314.644 | -3.8 |
| <b>SJLZQPENKU</b> | 53 | 595.2874 | 2 | 18.26 | 1188.564 | -2.8 |



## Library 2 design:

|     |       |     |       |       |     |       |     |     |
|-----|-------|-----|-------|-------|-----|-------|-----|-----|
| 1   | 2     | 3   | 4     | 5     | 6   | 7     | 8   | 9   |
| Ala | hAlaC | Phe | hAlaT | hAlaG | Trp | hAlaA | Tyr | Lys |
| Ser | His   | Leu | Arg   | Gln   | Pro | Glu   | Asn |     |

## Full lists of unique sequences for the test library with homoalanyl nucleobase monomers

*U = C-terminal amide, B = hAlaA, J = hAlaC, X = hAlaG, Z = hAlaT*

| Peptide    | ALC (%) | m/z      | z | RT    | Mass     | ppm  |
|------------|---------|----------|---|-------|----------|------|
| AHFZQPBNKU | 99      | 423.2116 | 3 | 18.02 | 1266.605 | 6.7  |
| SHFRQPEYKU | 99      | 397.5396 | 3 | 18.21 | 1189.599 | -1.9 |
| SHFZQPENKU | 99      | 398.8591 | 3 | 18.27 | 1193.555 | 0.5  |
| SHFRQWENKU | 99      | 410.8746 | 3 | 18.8  | 1229.606 | -2.8 |
| AHFRQPEYKU | 99      | 392.2077 | 3 | 19.08 | 1173.604 | -2.5 |
| AHFRQWENKU | 99      | 405.5429 | 3 | 19.13 | 1213.61  | -2.9 |
| AHLZXPENKU | 99      | 417.5414 | 3 | 19.6  | 1249.604 | -1.3 |
| SJLRQWENKU | 99      | 418.5536 | 3 | 20.31 | 1252.639 | 0    |
| AHFRXWENKU | 99      | 440.8849 | 3 | 21    | 1319.639 | -4.5 |
| AHLZQPBYKU | 99      | 428.2235 | 3 | 22.78 | 1281.64  | 6.4  |
| SHLZQPEYKU | 99      | 403.8709 | 3 | 23.71 | 1208.591 | 0    |
| SHFZQPBYKU | 99      | 444.8817 | 3 | 23.9  | 1331.62  | 2.6  |
| SHLRQWEYKU | 99      | 415.886  | 3 | 24.11 | 1244.641 | -4.1 |
| AHFZQPBYKU | 99      | 439.55   | 3 | 24.71 | 1315.625 | 2.6  |
| AHLRQWEYKU | 99      | 410.5535 | 3 | 25.12 | 1228.647 | -6.4 |
| AHLRXWEYKU | 99      | 445.8977 | 3 | 26.57 | 1334.675 | -2.9 |
| SHLZXPEYKU | 99      | 439.2134 | 3 | 27.02 | 1314.619 | -0.7 |
| AHFRQWBYKU | 99      | 451.5661 | 3 | 27.13 | 1351.675 | 0.8  |
| AHLZQWBNKU | 99      | 441.556  | 3 | 27.53 | 1321.647 | -0.4 |
| SJLRQWEYKU | 99      | 434.8938 | 3 | 27.62 | 1301.66  | 0    |
| AHLZQWENKU | 99      | 411.8748 | 3 | 27.72 | 1232.602 | 0.3  |
| SHLZQWBNKU | 99      | 446.8889 | 3 | 28.01 | 1337.642 | 2.3  |
| AHLZXWBNKU | 99      | 476.8998 | 3 | 28.05 | 1427.675 | 1.7  |
| AHLZXPEYKU | 99      | 433.8809 | 3 | 28.12 | 1298.625 | -2.8 |
| SHFRQWEYKU | 99      | 427.2149 | 3 | 28.25 | 1278.626 | -2.2 |
| AHFZQPEYKU | 99      | 409.8671 | 3 | 28.49 | 1226.58  | -0.6 |
| SHLZXWENKU | 99      | 452.5478 | 3 | 29.44 | 1354.626 | -2.9 |
| AHLZXWENKU | 99      | 447.2163 | 3 | 29.97 | 1338.631 | -2.6 |
| AHFRQWEYKU | 99      | 421.8824 | 3 | 30.09 | 1262.631 | -4.2 |
| AHFZQWBNKU | 99      | 452.886  | 3 | 31.04 | 1355.631 | 4    |
| SHFZQWBNKU | 99      | 458.2152 | 3 | 31.25 | 1371.626 | -1.5 |
| SHFZQWENKU | 99      | 428.5341 | 3 | 31.39 | 1282.581 | -0.7 |
| AHFZQWENKU | 99      | 423.2029 | 3 | 32.14 | 1266.586 | 0.5  |
| SJFRQWEYKU | 99      | 446.2207 | 3 | 32.47 | 1335.644 | -2.9 |
| AHFZXPEYKU | 99      | 445.2097 | 3 | 32.79 | 1332.609 | -1.2 |
| SHFZXWENKU | 99      | 463.8763 | 3 | 32.95 | 1388.61  | -2   |

|            |    |          |   |       |          |      |
|------------|----|----------|---|-------|----------|------|
| AHFZXWENKU | 99 | 458.5442 | 3 | 33.78 | 1372.615 | -3   |
| SHLZQWBYKU | 99 | 463.2287 | 3 | 36.6  | 1386.662 | 1.7  |
| AHLZQWBYKU | 99 | 457.8978 | 3 | 37.04 | 1370.667 | 3.4  |
| AHLZXWBYKU | 99 | 493.2404 | 3 | 38.47 | 1476.696 | 2.6  |
| SHFZQWBYKU | 99 | 474.5564 | 3 | 39.7  | 1420.646 | 0.9  |
| AHFZQWBYKU | 99 | 469.2244 | 3 | 40.58 | 1404.651 | 0    |
| AHLZQWEYKU | 99 | 428.2141 | 3 | 40.71 | 1281.623 | -1.6 |
| AHLZXWEYKU | 99 | 463.5563 | 3 | 41.15 | 1387.651 | -2.9 |
| AHFZXWBYKU | 99 | 378.6775 | 4 | 41.81 | 1510.68  | 0.6  |
| SHFZQWEYKU | 99 | 666.8074 | 2 | 43.82 | 1331.602 | -1.1 |
| SHFZXWEYKU | 99 | 480.216  | 3 | 44.06 | 1437.63  | -3   |
| AHFZQWEYKU | 99 | 439.5416 | 3 | 45.12 | 1315.607 | -3   |
| AHFZXWEYKU | 99 | 474.8837 | 3 | 45.19 | 1421.636 | -4.4 |
| SJFZXWEYKU | 99 | 499.2241 | 3 | 47.24 | 1494.648 | 1.3  |
| SHFZQPBNKU | 98 | 428.5418 | 3 | 17.65 | 1282.599 | 3.4  |
| SJLRQPEYKU | 98 | 405.2179 | 3 | 18.14 | 1212.633 | -0.9 |
| AHLRXWENKU | 98 | 429.5605 | 3 | 18.71 | 1285.655 | 4    |
| AHFZQPENKU | 98 | 393.5273 | 3 | 18.77 | 1177.56  | 0.3  |
| SJFRQPBYKU | 98 | 446.2294 | 3 | 18.79 | 1335.662 | 3.3  |
| SHLZXPENKU | 98 | 422.873  | 3 | 18.95 | 1265.599 | -1.4 |
| AHFRQWBNKU | 98 | 326.6713 | 4 | 20.15 | 1302.655 | 0.9  |
| AHFZXPBNKU | 98 | 458.5526 | 3 | 21.25 | 1372.633 | 2.1  |
| SHLZQPBYKU | 98 | 433.5542 | 3 | 22.25 | 1297.636 | 4.1  |
| SJFRQWENKU | 98 | 429.8812 | 3 | 22.58 | 1286.624 | -1.4 |
| SHLRQWBYKU | 98 | 334.4287 | 4 | 23.49 | 1333.686 | -0.3 |
| AHLZQPEYKU | 98 | 398.5392 | 3 | 24.58 | 1192.596 | 0    |
| SHFZQPEYKU | 98 | 415.1993 | 3 | 27.36 | 1242.575 | 0.8  |
| SHFRXWEYKU | 98 | 347.169  | 4 | 29.89 | 1384.654 | -5.4 |
| SJLZXPEYKU | 98 | 458.219  | 3 | 30.29 | 1371.638 | -1.8 |
| SJFZQPEYKU | 98 | 434.2049 | 3 | 31.06 | 1299.594 | -0.4 |
| SJLZXWENKU | 98 | 471.5559 | 3 | 35.47 | 1411.644 | 1.4  |
| SHLZXWBYKU | 98 | 498.5714 | 3 | 38.05 | 1492.69  | 1.3  |
| SJFZQWBNKU | 98 | 477.224  | 3 | 38.21 | 1428.644 | 4.3  |
| SJFZXWENKU | 98 | 482.8838 | 3 | 38.43 | 1445.628 | 0.9  |
| SJLZQWBYKU | 98 | 482.2351 | 3 | 42.41 | 1443.68  | 2.2  |
| SJFZQWBYKU | 98 | 493.5644 | 3 | 44.44 | 1477.665 | 4.7  |
| SHLRXWENKU | 97 | 326.4186 | 4 | 18.45 | 1301.65  | -3.3 |
| AJFRQPBYKU | 97 | 440.8978 | 3 | 18.83 | 1319.667 | 3.4  |
| SJFZQPBNKU | 97 | 447.5486 | 3 | 19.74 | 1339.617 | 5    |
| SHFRQWBNKU | 97 | 330.6698 | 4 | 19.98 | 1318.65  | 0.1  |
| SJFZQPENKU | 97 | 417.8656 | 3 | 20.98 | 1250.573 | 1.7  |
| AJFZQPENKU | 97 | 412.5341 | 3 | 21.12 | 1234.578 | 1.9  |
| SHFZXPENKU | 97 | 434.2004 | 3 | 21.89 | 1299.583 | -3   |
| SJFRQWBNKU | 97 | 459.5647 | 3 | 23.4  | 1375.668 | 2.9  |
| AHLRQWBYKU | 97 | 330.4298 | 4 | 24.03 | 1317.691 | -0.7 |

|                   |    |          |   |       |          |      |
|-------------------|----|----------|---|-------|----------|------|
| <b>SJLZQPBYKU</b> | 97 | 452.56   | 3 | 24.75 | 1354.654 | 3.5  |
| <b>AHLRXWBYKU</b> | 97 | 356.9363 | 4 | 25.59 | 1423.72  | -2.4 |
| <b>SHLRXWEYKU</b> | 97 | 338.6731 | 4 | 26.12 | 1350.67  | -4.9 |
| <b>SJLZQPEYKU</b> | 97 | 422.8782 | 3 | 26.84 | 1265.609 | 2.9  |
| <b>SJFZQPBYKU</b> | 97 | 463.889  | 3 | 27.2  | 1388.638 | 5.2  |
| <b>SJFRQWBYKU</b> | 97 | 357.1793 | 4 | 30.5  | 1424.689 | -0.3 |
| <b>AHFZXWBNKU</b> | 97 | 488.2277 | 3 | 31.78 | 1461.659 | 1.2  |
| <b>AJFRXWEYKU</b> | 97 | 476.2319 | 3 | 33.28 | 1425.678 | -2.5 |
| <b>SJFZXPEYKU</b> | 97 | 469.5474 | 3 | 34.61 | 1405.622 | -1   |
| <b>AJFZXWEYKU</b> | 97 | 493.8935 | 3 | 47.71 | 1478.654 | 3.4  |
| <b>SHLRQWBNKU</b> | 96 | 322.174  | 4 | 18.42 | 1284.666 | 0.9  |
| <b>AJLRXWENKU</b> | 96 | 448.5642 | 3 | 20.56 | 1342.673 | -1.5 |
| <b>SJLZXPENKU</b> | 96 | 441.8802 | 3 | 21.46 | 1322.617 | 1.3  |
| <b>SJLRXWENKU</b> | 96 | 453.8947 | 3 | 21.66 | 1358.668 | -4   |
| <b>SJLRQWBNKU</b> | 96 | 336.4283 | 4 | 21.69 | 1341.684 | 0.2  |
| <b>AHFRXPEYKU</b> | 96 | 427.5495 | 3 | 21.92 | 1279.633 | -4.9 |
| <b>SHFRQWBYKU</b> | 96 | 342.9247 | 4 | 26.34 | 1367.67  | -0.6 |
| <b>AJLZXWEYKU</b> | 96 | 482.5634 | 3 | 43.5  | 1444.669 | -0.5 |
| <b>SJFZQWEYKU</b> | 96 | 463.8809 | 3 | 47.05 | 1388.62  | 0.6  |
| <b>SJLRQPBYKU</b> | 95 | 434.9009 | 3 | 17.82 | 1301.678 | 2.6  |
| <b>AJLZQPENKU</b> | 95 | 401.2056 | 3 | 18.3  | 1200.594 | 1.1  |
| <b>AHLRXPEYKU</b> | 95 | 416.2214 | 3 | 19.03 | 1245.648 | -4.8 |
| <b>AHLZXPBNKU</b> | 95 | 447.2239 | 3 | 19.38 | 1338.649 | 0.8  |
| <b>AJFRQPEYKU</b> | 95 | 411.2141 | 3 | 20.85 | 1230.623 | -1.7 |
| <b>AJLZQPEYKU</b> | 95 | 417.5464 | 3 | 27.03 | 1249.614 | 2.4  |
| <b>AHFRXWBYKU</b> | 95 | 365.4332 | 4 | 29.05 | 1457.704 | -0.2 |
| <b>AJFZQPEYKU</b> | 95 | 428.8728 | 3 | 31.66 | 1283.598 | -1.3 |
| <b>SJLZQWENKU</b> | 95 | 436.2126 | 3 | 34.22 | 1305.615 | 0.7  |
| <b>SJLZQWBNKU</b> | 95 | 465.896  | 3 | 36.91 | 1394.66  | 4.6  |
| <b>AHLRXWBNKU</b> | 94 | 344.6818 | 4 | 19.06 | 1374.699 | -0.9 |
| <b>SJFRQPEYKU</b> | 94 | 416.5466 | 3 | 20.9  | 1246.617 | 0.5  |
| <b>AJFZXPENKU</b> | 94 | 447.8758 | 3 | 25.71 | 1340.607 | -0.8 |
| <b>SJLZQPBNKU</b> | 93 | 436.2207 | 3 | 18.44 | 1305.633 | 5.4  |
| <b>AJLRQWENKU</b> | 93 | 413.222  | 3 | 18.94 | 1236.644 | -0.1 |
| <b>SJFRXWENKU</b> | 93 | 465.2241 | 3 | 23.85 | 1392.652 | -1.2 |
| <b>SHLRXWBYKU</b> | 93 | 360.9349 | 4 | 25.16 | 1439.715 | -2.9 |
| <b>SJFZXPENKU</b> | 93 | 453.2068 | 3 | 25.4  | 1356.602 | -2.1 |
| <b>AJLZXPEYKU</b> | 93 | 452.8888 | 3 | 30.75 | 1355.643 | 1.5  |
| <b>SJLZQWEYKU</b> | 93 | 452.5518 | 3 | 43.72 | 1354.636 | -1.7 |
| <b>SHLRXPEYKU</b> | 92 | 316.4172 | 4 | 18.45 | 1261.643 | -2.7 |
| <b>SHFZXPNKU</b>  | 92 | 348.1648 | 4 | 20.59 | 1388.628 | 1.5  |
| <b>AHFRXWBNKU</b> | 92 | 353.1781 | 4 | 21.49 | 1408.684 | -0.3 |
| <b>AHLZXPBYKU</b> | 92 | 347.925  | 4 | 26.44 | 1387.669 | 1.5  |
| <b>SJFZXWBYKU</b> | 92 | 396.9316 | 4 | 44.83 | 1583.693 | 2.7  |
| <b>AJFZQPBNKU</b> | 91 | 442.217  | 3 | 19.84 | 1323.623 | 5    |

|            |    |          |   |       |          |      |
|------------|----|----------|---|-------|----------|------|
| SJLRXWEYKU | 91 | 470.2364 | 3 | 28.87 | 1407.688 | -0.7 |
| SHFZXWBNKU | 91 | 493.5585 | 3 | 31.1  | 1477.655 | -0.6 |
| AJFZQWENKU | 91 | 442.2094 | 3 | 36.82 | 1323.605 | 1.3  |
| SHFZXWBYKU | 91 | 382.6757 | 4 | 41.07 | 1526.675 | -0.8 |
| SHLRXWBNKU | 90 | 348.6808 | 4 | 18.83 | 1390.694 | -0.1 |
| SHLZXPBNKU | 90 | 339.6689 | 4 | 18.91 | 1354.644 | 2    |
| SHFRXWENKU | 90 | 334.9145 | 4 | 20.6  | 1335.634 | -3.8 |
| SJLZXPBNKU | 90 | 471.5635 | 3 | 20.88 | 1411.662 | 4.9  |
| AJFZQPBYKU | 90 | 458.5573 | 3 | 27.44 | 1372.643 | 5.1  |
| SJFZXPBYKU | 90 | 374.6754 | 4 | 31.9  | 1494.667 | 4.1  |
| AJLZXWENKU | 90 | 466.2236 | 3 | 33.98 | 1395.649 | 0    |
| AJLZQPBNKU | 89 | 430.8893 | 3 | 18.4  | 1289.638 | 6.1  |
| AJFRXWBNKU | 89 | 489.5753 | 3 | 23.38 | 1465.702 | 1.7  |
| SJFRXPEYKU | 89 | 451.889  | 3 | 23.76 | 1352.646 | -0.7 |
| AJFRQWBYKU | 89 | 353.1815 | 4 | 30.61 | 1408.694 | 2.4  |
| SHLZXWEYKU | 89 | 702.8286 | 2 | 40.95 | 1403.646 | -2.5 |
| SJLRXWBNKU | 88 | 362.9362 | 4 | 21.82 | 1447.712 | 2.4  |
| AJLZQWBNKU | 88 | 460.5645 | 3 | 32.03 | 1378.665 | 5    |
| AJFZXPEYKU | 88 | 464.2175 | 3 | 35.31 | 1389.627 | 2.6  |
| SJLZXWBNKU | 88 | 501.239  | 3 | 35.4  | 1500.688 | 4.7  |
| AJLZQWBYKU | 88 | 476.9041 | 3 | 40.14 | 1427.685 | 3.7  |
| SJLZXWBYKU | 88 | 388.4347 | 4 | 42.6  | 1549.709 | 0.6  |
| AJFZQWBYKU | 88 | 488.2313 | 3 | 44.03 | 1461.67  | 1.7  |
| SJLZXWEYKU | 88 | 731.3401 | 2 | 44.24 | 1460.664 | 1.2  |
| AJLRQWBNKU | 87 | 332.4305 | 4 | 20.19 | 1325.689 | 3    |
| SJFZXPBNKU | 87 | 482.8906 | 3 | 23.21 | 1445.646 | 2.7  |
| AJFZXPBNKU | 87 | 477.5592 | 3 | 23.53 | 1429.651 | 3.3  |
| AJLZQPBYKU | 87 | 447.2281 | 3 | 24.98 | 1338.659 | 2.7  |
| AJLRQWEYKU | 87 | 429.5619 | 3 | 27.41 | 1285.665 | -0.7 |
| AJFZXWBNKU | 87 | 507.2353 | 3 | 36.08 | 1518.678 | 4.2  |
| AJFZXWBYKU | 87 | 523.5753 | 3 | 44.77 | 1567.698 | 3.9  |
| AJFRXPBYKU | 86 | 476.2392 | 3 | 22.43 | 1425.696 | 0.1  |
| AJFRQWBNKU | 86 | 340.9267 | 4 | 22.83 | 1359.673 | 3.5  |
| AJFRXPEYKU | 86 | 446.5569 | 3 | 24.41 | 1336.651 | -1.8 |
| AHFRXWEYKU | 86 | 343.1701 | 4 | 31.18 | 1368.659 | -5.9 |
| AJFRQWEYKU | 86 | 440.8906 | 3 | 32.74 | 1319.649 | 0.6  |
| AJLZQWEYKU | 86 | 670.3287 | 2 | 43.33 | 1338.641 | 1.7  |
| AJLZQWENKU | 85 | 645.8191 | 2 | 31.9  | 1289.62  | 2.5  |
| AJFZXWENKU | 85 | 715.824  | 2 | 38.61 | 1429.633 | 0.2  |
| SHLZQWENKU | 84 | 625.3054 | 2 | 27.72 | 1248.597 | -0.6 |
| SHLRQPEYKU | 83 | 386.2111 | 3 | 17.2  | 1155.615 | -2.9 |
| SHFRXPBYKU | 83 | 347.1753 | 4 | 19.64 | 1384.672 | -0.3 |
| SHFRXPEYKU | 83 | 324.9131 | 4 | 21.24 | 1295.628 | -3.5 |
| AJFZQWBNKU | 83 | 707.3346 | 2 | 35.87 | 1412.649 | 3.9  |
| SJLRQWBYKU | 82 | 348.6842 | 4 | 27    | 1390.704 | 2.5  |

|            |    |          |   |       |          |      |
|------------|----|----------|---|-------|----------|------|
| AJLZXPENKU | 81 | 436.5486 | 3 | 21.74 | 1306.622 | 1.4  |
| AJLRQPEYKU | 80 | 399.886  | 3 | 18.25 | 1196.638 | -1.7 |
| AJLRXWBNKU | 80 | 358.9366 | 4 | 20.71 | 1431.717 | 0    |
| AJFRQWENKU | 80 | 424.5495 | 3 | 22.07 | 1270.629 | -1.5 |
| AJLRQWBYKU | 79 | 344.6858 | 4 | 26.63 | 1374.709 | 3.4  |
| AJLRXPEYKU | 78 | 435.2291 | 3 | 21.23 | 1302.667 | -1   |
| SJFZQWENKU | 77 | 447.5406 | 3 | 37.2  | 1339.6   | 0.2  |
| AJLZXWBYKU | 77 | 512.246  | 3 | 41.17 | 1533.714 | 1.6  |
| SJLRXPBYKU | 76 | 470.2426 | 3 | 20.07 | 1407.706 | -0.2 |
| SHLZXWBNKU | 76 | 361.925  | 4 | 27.83 | 1443.67  | 0.6  |
| AJFZXPBYKU | 76 | 493.8997 | 3 | 32.82 | 1478.672 | 3.9  |
| AJLZXPBNKU | 75 | 466.2315 | 3 | 21.24 | 1395.667 | 4.3  |
| AJLZXPBYKU | 75 | 362.1805 | 4 | 29.12 | 1444.687 | 3.9  |
| SHFZXPBYKU | 74 | 360.4199 | 4 | 28.52 | 1437.648 | 1.5  |
| AJFZQWEYKU | 74 | 458.5493 | 3 | 47.53 | 1372.625 | 0.8  |
| AJLRXWEYKU | 72 | 464.9033 | 3 | 28.15 | 1391.693 | -3.8 |
| AHFZXPBYKU | 72 | 474.8919 | 3 | 29.71 | 1421.653 | 0.3  |
| SHFZXPEYKU | 72 | 450.5412 | 3 | 31.36 | 1348.604 | -1.5 |
| AJLZXWBNKU | 71 | 495.9073 | 3 | 32.07 | 1484.693 | 4.4  |
| SHLRXPBYKU | 70 | 338.679  | 4 | 18.15 | 1350.688 | -0.7 |
| AJLRXWBYKU | 70 | 494.5876 | 3 | 27.07 | 1480.738 | 2.1  |
| AHLRQPBYKU | 69 | 410.5625 | 3 | 17.25 | 1228.665 | 0.8  |
| AHLRXPBYKU | 69 | 334.6808 | 4 | 18.62 | 1334.693 | 0.6  |
| SHLZXPBYKU | 68 | 351.9233 | 4 | 25.77 | 1403.664 | 0.1  |
| SJFRXPBYKU | 67 | 361.4298 | 4 | 22.37 | 1441.69  | -0.3 |
| SHLZQWEYKU | 64 | 433.5445 | 3 | 39.46 | 1297.617 | -4.5 |
| AJLRXPBYKU | 61 | 348.9359 | 4 | 20.2  | 1391.711 | 2.5  |
| AHFRXPBYKU | 60 | 343.1765 | 4 | 20.42 | 1368.677 | -0.4 |
| SJFZXWBNKU | 60 | 512.5652 | 3 | 37.3  | 1534.673 | 0.9  |
| AHLRQPEYKU | 57 | 380.8793 | 3 | 17.42 | 1139.62  | -3.4 |
| AHFRQPBYKU | 57 | 421.8904 | 3 | 17.63 | 1262.649 | 0.5  |
| SHLRQPBYKU | 55 | 415.8936 | 3 | 26.05 | 1244.659 | -0.3 |

Library 3 design:

|     |      |     |      |      |     |      |     |     |
|-----|------|-----|------|------|-----|------|-----|-----|
| 1   | 2    | 3   | 4    | 5    | 6   | 7    | 8   | 9   |
| Ala | DabC | Phe | DabT | DabG | Trp | DabA | Tyr | Lys |
| Ser | His  | Leu | Arg  | Gln  | Pro | Glu  | Asn |     |

Full lists of unique sequences for the test library with diaminobutanoic acid based nucleobase monomers

*U = C-terminal amide, B = DabA, J = DabC, X = DabG, Z = DabT*

| Peptide    | ALC (%) | m/z      | z | RT    | Mass     | ppm  |
|------------|---------|----------|---|-------|----------|------|
| SHFZQPENKU | 99      | 417.8659 | 3 | 15.62 | 1250.575 | 1    |
| SHLZZPENKU | 99      | 460.8875 | 3 | 15.84 | 1379.639 | 1.4  |
| SHFRQPEYKU | 99      | 397.5388 | 3 | 15.94 | 1189.599 | -3.8 |
| AHLRZPEYKU | 99      | 435.2289 | 3 | 16.02 | 1302.669 | -2.7 |
| AHLZZPENKU | 99      | 455.5548 | 3 | 16.63 | 1363.644 | -1.1 |
| AHFRQPEYKU | 99      | 392.2072 | 3 | 16.66 | 1173.604 | -3.8 |
| SHFRQWENKU | 99      | 410.8743 | 3 | 16.82 | 1229.606 | -3.6 |
| SHLRZWENKU | 99      | 453.8949 | 3 | 16.92 | 1358.67  | -5.1 |
| AHFRQWENKU | 99      | 405.5417 | 3 | 17.09 | 1213.61  | -5.8 |
| AHFRQWZNKU | 99      | 454.2322 | 3 | 17.88 | 1359.675 | -0.1 |
| SHFZZPENKU | 99      | 472.2149 | 3 | 18.01 | 1413.623 | -0.4 |
| AHFZZPENKU | 99      | 466.8833 | 3 | 18.96 | 1397.628 | -0.2 |
| SHFRZWZNKU | 99      | 513.9144 | 3 | 19.65 | 1538.719 | 1.8  |
| SHFRZWENKU | 99      | 465.2245 | 3 | 19.77 | 1392.654 | -1.6 |
| AHFRZWENKU | 99      | 459.8923 | 3 | 20.19 | 1376.659 | -2.9 |
| AHFRZWZNKU | 99      | 508.5823 | 3 | 20.2  | 1522.724 | 1    |
| SHLRQWEYKU | 99      | 415.8863 | 3 | 23.28 | 1244.641 | -3.4 |
| AHLRQWEYKU | 99      | 410.5552 | 3 | 24.23 | 1228.647 | -2.2 |
| SHLZZPEYKU | 99      | 477.228  | 3 | 24.42 | 1428.659 | 1.9  |
| AHLZZPEYKU | 99      | 471.8955 | 3 | 25.82 | 1412.665 | 0.2  |
| AHLZQWENKU | 99      | 430.882  | 3 | 26.7  | 1289.622 | 1.6  |
| SHLRZWEYKU | 99      | 470.2365 | 3 | 26.74 | 1407.69  | -1.7 |
| AHLRZWEYKU | 99      | 464.9048 | 3 | 27.29 | 1391.695 | -1.8 |
| SHFRQWEYKU | 99      | 427.2147 | 3 | 27.73 | 1278.626 | -2.8 |
| SHFZZPEYKU | 99      | 488.5553 | 3 | 27.97 | 1462.644 | 0.2  |
| AHFRQWZYKU | 99      | 470.5727 | 3 | 28.01 | 1408.695 | 0.6  |
| SHLZZWENKU | 99      | 735.3419 | 2 | 28.37 | 1468.666 | 2.5  |
| AZLRQWEYKU | 99      | 448.5694 | 3 | 28.66 | 1342.685 | 1.1  |
| AHLZZWENKU | 99      | 485.2312 | 3 | 28.8  | 1452.671 | 0.7  |
| AHFZZPEYKU | 99      | 483.2245 | 3 | 29.2  | 1446.649 | 1.8  |
| AHFRQWEYKU | 99      | 421.8832 | 3 | 29.45 | 1262.631 | -2.4 |
| SHFZQWENKU | 99      | 447.5413 | 3 | 29.56 | 1339.601 | 0.5  |
| SHFRZWEYKU | 99      | 481.5642 | 3 | 30.25 | 1441.674 | -2.4 |

|            |    |          |   |       |          |      |
|------------|----|----------|---|-------|----------|------|
| SHFZZWENKU | 99 | 501.8901 | 3 | 30.84 | 1502.65  | -0.9 |
| AHFRZWEYKU | 99 | 476.2326 | 3 | 31.31 | 1425.679 | -2.4 |
| AHFZZWENKU | 99 | 496.5594 | 3 | 31.83 | 1486.655 | 0.9  |
| SZFRQWEYKU | 99 | 465.2292 | 3 | 32.46 | 1392.664 | 1.3  |
| AZFRQWEYKU | 99 | 459.8966 | 3 | 33.64 | 1376.669 | -0.6 |
| AZFRZWEYKU | 99 | 514.246  | 3 | 35.56 | 1539.718 | -0.9 |
| SZFZZWENKU | 99 | 539.905  | 3 | 36.48 | 1616.688 | 3.3  |
| SHLZZWZYKU | 99 | 555.5932 | 3 | 36.63 | 1663.751 | 4.4  |
| SHLZQWEYKU | 99 | 452.5528 | 3 | 38.13 | 1354.638 | -0.7 |
| AHLZQWEYKU | 99 | 447.2216 | 3 | 39.36 | 1338.643 | 0.3  |
| SHLZZWEYKU | 99 | 506.9029 | 3 | 39.4  | 1517.686 | 0.6  |
| AHLZZWEYKU | 99 | 501.5717 | 3 | 40.32 | 1501.691 | 1.5  |
| SHFZQWEYKU | 99 | 463.8811 | 3 | 41.78 | 1388.622 | -0.2 |
| SHFZZWEYKU | 99 | 518.2308 | 3 | 42.04 | 1551.67  | 0.1  |
| AHFZQWEYKU | 99 | 458.5499 | 3 | 42.97 | 1372.627 | 0.7  |
| AHFZZWEYKU | 99 | 512.8981 | 3 | 43.09 | 1535.675 | -1.8 |
| AHFZQPZSKU | 98 | 461.2243 | 3 | 16.18 | 1380.645 | 4.7  |
| AHFZQPENKU | 98 | 412.5342 | 3 | 16.31 | 1234.58  | 0.8  |
| SZLRQPEYKU | 98 | 424.2242 | 3 | 16.41 | 1269.653 | -1.9 |
| AHLRZWZSKU | 98 | 497.2532 | 3 | 17.44 | 1488.739 | -1   |
| AZLRZPEYKU | 98 | 473.2437 | 3 | 19.77 | 1416.707 | 1.8  |
| AZFRQPEYKU | 98 | 430.2221 | 3 | 20.52 | 1287.643 | 1.5  |
| SZFRQWZSKU | 98 | 497.5778 | 3 | 21.15 | 1489.708 | 2.4  |
| SZLRZWENKU | 98 | 491.9105 | 3 | 22.33 | 1472.708 | 1.3  |
| AZFRZPEYKU | 98 | 484.5714 | 3 | 22.75 | 1450.691 | 0.9  |
| SHLZQPEYKU | 98 | 422.8777 | 3 | 22.78 | 1265.611 | 0.3  |
| AHLZQWZSKU | 98 | 479.5718 | 3 | 24.91 | 1435.687 | 4.9  |
| SHLZQWENKU | 98 | 436.2138 | 3 | 26.07 | 1305.617 | 2    |
| AHFZQPZYKU | 98 | 477.5636 | 3 | 26.38 | 1429.665 | 2.9  |
| AHLRZWZYKU | 98 | 385.4481 | 4 | 26.72 | 1537.76  | 2.4  |
| AHLZZWZSKU | 98 | 533.9205 | 3 | 27.17 | 1598.735 | 2.8  |
| AZLZQPEYKU | 98 | 455.5606 | 3 | 27.3  | 1363.654 | 4.4  |
| SHFZQWZSKU | 98 | 496.2311 | 3 | 27.42 | 1485.666 | 3.7  |
| SZLRQWEYKU | 98 | 453.9011 | 3 | 28.26 | 1358.68  | 1.4  |
| SHFZZWZSKU | 98 | 550.5815 | 3 | 28.7  | 1648.714 | 5.1  |
| AHFZZWZSKU | 98 | 545.2494 | 3 | 29.55 | 1632.72  | 4.2  |
| SZLRZWZYKU | 98 | 556.9402 | 3 | 30.33 | 1667.793 | 3.6  |
| AHFZQWENKU | 98 | 442.2093 | 3 | 30.41 | 1323.606 | -0.4 |
| SZLZZWZSKU | 98 | 577.2672 | 3 | 31.17 | 1728.768 | 6.5  |
| AZFZZPEYKU | 98 | 521.2385 | 3 | 32.92 | 1560.687 | 4.3  |
| SZFRZWEYKU | 98 | 519.5786 | 3 | 35    | 1555.712 | 0.9  |
| SHLZQWZYKU | 98 | 501.2431 | 3 | 35.44 | 1500.702 | 3.8  |
| AHLZQWZYKU | 98 | 495.9115 | 3 | 36.47 | 1484.707 | 3.8  |
| AHLZZWZYKU | 98 | 412.9475 | 4 | 37.51 | 1647.756 | 3.2  |
| SHFZQWZYKU | 98 | 512.571  | 3 | 38.77 | 1534.686 | 3.2  |

|            |    |          |   |       |          |      |
|------------|----|----------|---|-------|----------|------|
| SHFZZWZYKU | 98 | 425.4424 | 4 | 39.33 | 1697.735 | 3.2  |
| AZLZZWEYKU | 98 | 539.5858 | 3 | 43.5  | 1615.729 | 3.9  |
| SZLZZWEYKU | 98 | 544.9175 | 3 | 43.7  | 1631.724 | 4    |
| SZFZZWEYKU | 98 | 556.2455 | 3 | 45.93 | 1665.709 | 3.7  |
| SHLRZPEYKU | 97 | 440.5604 | 3 | 15.48 | 1318.663 | -3.1 |
| AZLRQPEYKU | 97 | 418.8932 | 3 | 16.76 | 1253.658 | -0.4 |
| SHLRZWZSKU | 97 | 377.1904 | 4 | 16.88 | 1504.734 | -1.2 |
| SHFRQWZSKU | 97 | 344.9242 | 4 | 17.03 | 1375.67  | -1.6 |
| AZLRQWENKU | 97 | 432.2291 | 3 | 18.43 | 1293.664 | 0.8  |
| SZFZQPENKU | 97 | 455.8793 | 3 | 18.99 | 1364.613 | 2.3  |
| AZFZQPENKU | 97 | 450.5487 | 3 | 19.86 | 1348.618 | 4.5  |
| SZFRQPEYKU | 97 | 435.5536 | 3 | 19.94 | 1303.638 | 1.2  |
| SZFRQWENKU | 97 | 448.8889 | 3 | 21.8  | 1343.644 | 1.1  |
| SZFRZWZSKU | 97 | 551.9274 | 3 | 23.09 | 1652.757 | 2.3  |
| SHLRZWZYKU | 97 | 389.4463 | 4 | 26.21 | 1553.754 | 1    |
| SHLZZWZSKU | 97 | 539.2523 | 3 | 26.34 | 1614.73  | 3.1  |
| AHFRZWZYKU | 97 | 393.9439 | 4 | 29.84 | 1571.744 | 1.6  |
| SZFZQPEYKU | 97 | 472.2201 | 3 | 30.32 | 1413.633 | 3.6  |
| AZLRZWEYKU | 97 | 502.919  | 3 | 31.97 | 1505.733 | 1.4  |
| SZFZZPEYKU | 97 | 526.5698 | 3 | 32.14 | 1576.682 | 3.5  |
| SZFZQWZSKU | 97 | 534.2457 | 3 | 32.54 | 1599.704 | 6.9  |
| SZFZQWZYKU | 97 | 550.5857 | 3 | 42.38 | 1648.725 | 6.5  |
| AHLRQPZYKU | 96 | 429.5692 | 3 | 15.34 | 1285.685 | 0.9  |
| SZLRZPEYKU | 96 | 478.5745 | 3 | 19.04 | 1432.702 | -0.1 |
| AZLRZWZSKU | 96 | 535.2693 | 3 | 21.26 | 1602.777 | 5.5  |
| SHLZQPZYKU | 96 | 471.5681 | 3 | 22.28 | 1411.675 | 5    |
| AHLZQPZYKU | 96 | 466.2354 | 3 | 23.22 | 1395.68  | 2.7  |
| AZFRZWZSKU | 96 | 546.597  | 3 | 23.31 | 1636.762 | 4.5  |
| SHLRQWZYKU | 96 | 348.6837 | 4 | 23.62 | 1390.706 | -0.3 |
| SHLZQWZSKU | 96 | 484.9032 | 3 | 23.95 | 1451.682 | 4.3  |
| SHFZQPZYKU | 96 | 482.8956 | 3 | 25.27 | 1445.66  | 3.6  |
| AHFZZPZYKU | 96 | 531.9138 | 3 | 27.83 | 1592.713 | 3.8  |
| AHFZQWZSKU | 96 | 490.8983 | 3 | 28.18 | 1469.671 | 1.6  |
| SZLZQWZSKU | 96 | 522.9175 | 3 | 29.43 | 1565.72  | 7    |
| AZFZQWENKU | 96 | 480.2245 | 3 | 35.87 | 1437.645 | 4.9  |
| SHFZQPZSKU | 95 | 466.5559 | 3 | 15.47 | 1396.639 | 4.7  |
| AHFRQPZYKU | 95 | 440.8966 | 3 | 16.87 | 1319.669 | -0.6 |
| AZLZZPENKU | 95 | 493.5691 | 3 | 20.38 | 1477.682 | 2.1  |
| AHLZZPZYKU | 95 | 520.5859 | 3 | 24.89 | 1558.729 | 4.4  |
| SHFRQWZYKU | 95 | 357.1795 | 4 | 27.18 | 1424.69  | -0.8 |
| AZLZZPZYKU | 95 | 558.6006 | 3 | 28.33 | 1672.767 | 7.7  |
| SZLZZPEYKU | 95 | 515.2415 | 3 | 28.58 | 1542.698 | 3.4  |
| SZFZQPZYKU | 95 | 520.9103 | 3 | 28.73 | 1559.698 | 7.2  |
| SZFZZPZYKU | 95 | 575.2591 | 3 | 30.66 | 1722.747 | 5.2  |
| SZFRQWZYKU | 95 | 385.6908 | 4 | 31.3  | 1538.729 | 3.6  |



|            |    |          |   |       |          |      |
|------------|----|----------|---|-------|----------|------|
| AZFZPZYKU  | 95 | 569.9273 | 3 | 31.6  | 1706.752 | 5.1  |
| AZLQWENKU  | 95 | 468.8958 | 3 | 31.79 | 1403.66  | 3.7  |
| AZLZZWZYKU | 95 | 588.2761 | 3 | 40.95 | 1761.794 | 7.3  |
| AZLZQPZSKU | 94 | 487.9097 | 3 | 16.48 | 1460.698 | 6.2  |
| AZLRQWZSKU | 94 | 360.9406 | 4 | 18.17 | 1439.729 | 3.2  |
| SZLRQWZSKU | 94 | 364.9398 | 4 | 18.29 | 1455.724 | 4.4  |
| SZFZQPZSKU | 94 | 504.5701 | 3 | 18.39 | 1510.678 | 7.3  |
| AZFRZWENKU | 94 | 497.9069 | 3 | 24.6  | 1490.697 | 1    |
| SHFRZWZYKU | 94 | 397.9426 | 4 | 29.14 | 1587.739 | 1.6  |
| SZLQWZYKU  | 94 | 539.2581 | 3 | 39.83 | 1614.74  | 7.6  |
| AHFQWZYKU  | 94 | 380.6817 | 4 | 39.99 | 1518.691 | 4.2  |
| AHFZZWZYKU | 94 | 421.4441 | 4 | 40.29 | 1681.74  | 4.3  |
| SZFZQWEYKU | 94 | 501.8952 | 3 | 45.6  | 1502.66  | 2.5  |
| AHFZZPZSKU | 93 | 515.5734 | 3 | 18.02 | 1543.693 | 3.5  |
| AZLRZWENKU | 93 | 486.579  | 3 | 21.87 | 1456.713 | 1.6  |
| SZFZZPENKU | 93 | 510.2299 | 3 | 22.26 | 1527.662 | 4.1  |
| SZLQPYKU   | 93 | 509.5818 | 3 | 25.74 | 1525.714 | 6.5  |
| SZLQPEYKU  | 93 | 460.8921 | 3 | 26.64 | 1379.649 | 3.8  |
| SHFZZPZYKU | 93 | 537.2458 | 3 | 26.93 | 1608.708 | 4.6  |
| AZFZQPZYKU | 93 | 515.5787 | 3 | 29.71 | 1543.703 | 7.2  |
| AZLRZWZYKU | 93 | 413.9581 | 4 | 30.65 | 1651.798 | 3.3  |
| AZFZQPEYKU | 93 | 466.8886 | 3 | 31.4  | 1397.638 | 4    |
| AZFRQWZYKU | 93 | 381.6922 | 4 | 32.53 | 1522.734 | 3.9  |
| AZFQWZSKU  | 93 | 528.9144 | 3 | 32.81 | 1583.709 | 7.7  |
| SZFRZWZYKU | 93 | 568.2689 | 3 | 33.38 | 1701.777 | 4.6  |
| SZFZZWZSKU | 93 | 588.5945 | 3 | 33.62 | 1762.753 | 5.2  |
| AZFRZWZYKU | 93 | 422.4547 | 4 | 33.82 | 1685.782 | 4.5  |
| SZLRQPZYKU | 92 | 472.914  | 3 | 16.86 | 1415.718 | 1.9  |
| AZFZQPZSKU | 92 | 499.2379 | 3 | 19.17 | 1494.683 | 6.1  |
| AZFRQWZSKU | 92 | 492.2476 | 3 | 21.69 | 1473.713 | 5.3  |
| SZLRQWZYKU | 92 | 502.5909 | 3 | 28.05 | 1504.744 | 4.6  |
| AZLQWZSKU  | 92 | 517.5864 | 3 | 29.21 | 1549.725 | 8    |
| SZLZZWZYKU | 92 | 593.6075 | 3 | 40.79 | 1777.789 | 6.9  |
| AZFZZWZYKU | 92 | 449.9548 | 4 | 43.36 | 1795.778 | 6.7  |
| AHLZQPZSKU | 91 | 449.8956 | 3 | 14.93 | 1346.66  | 3.6  |
| SHLRQPEYKU | 91 | 386.2108 | 3 | 14.96 | 1155.615 | -3.7 |
| AZLZQPENKU | 91 | 439.219  | 3 | 16.42 | 1314.634 | 1.1  |
| SHLRQWENKU | 91 | 399.5454 | 3 | 16.84 | 1195.621 | -5.6 |
| SZFRQPZYKU | 91 | 484.2436 | 3 | 19.87 | 1449.702 | 4.9  |
| SHLZZPZYKU | 91 | 525.9167 | 3 | 23.57 | 1574.724 | 2.8  |
| AZLRQPZYKU | 90 | 467.5824 | 3 | 17.39 | 1399.723 | 1.9  |
| SZLRQWENKU | 90 | 437.5607 | 3 | 18.7  | 1309.659 | 0.8  |
| AZFQWZYKU  | 90 | 545.2544 | 3 | 43    | 1632.73  | 7.3  |
| AHLRQPEYKU | 89 | 380.8794 | 3 | 15.25 | 1139.62  | -3   |
| AZLZQPZYKU | 89 | 504.2508 | 3 | 26.68 | 1509.719 | 7.9  |

|            |    |          |   |       |          |      |
|------------|----|----------|---|-------|----------|------|
| AZFZZWZSKU | 89 | 583.2639 | 3 | 34.02 | 1746.758 | 6.8  |
| AZFRZPENKU | 88 | 468.231  | 3 | 14.85 | 1401.671 | 0.5  |
| SHLRQPZYKU | 87 | 434.901  | 3 | 14.94 | 1301.679 | 1.3  |
| SZLRZWZSKU | 87 | 405.7011 | 4 | 21.17 | 1618.772 | 1.9  |
| AZLZZWZSKU | 87 | 571.9355 | 3 | 31.19 | 1712.773 | 6.5  |
| AZFZZWENKU | 87 | 534.5741 | 3 | 36.59 | 1600.693 | 4.6  |
| AZFZZWEYKU | 87 | 550.9141 | 3 | 46.35 | 1649.714 | 4.1  |
| AHLRZPZYKU | 86 | 363.1913 | 4 | 16.46 | 1448.733 | 2.3  |
| AHFRZPEYKU | 86 | 335.1693 | 4 | 19.11 | 1336.653 | -3.5 |
| AHLRQWZYKU | 86 | 344.6856 | 4 | 24.27 | 1374.711 | 1.8  |
| SZFZZWZYKU | 86 | 453.9525 | 4 | 42.87 | 1811.773 | 4.4  |
| AZFZQWEYKU | 86 | 496.5642 | 3 | 46.25 | 1486.665 | 3.8  |
| AZLZQWZYKU | 85 | 533.9264 | 3 | 40.01 | 1598.745 | 7.7  |
| SZLZQWEYKU | 85 | 490.5679 | 3 | 42.53 | 1468.676 | 4.3  |
| SZFRZPZSKU | 84 | 391.9414 | 4 | 14.84 | 1563.73  | 4.2  |
| SHFZQPEYKU | 84 | 650.8057 | 2 | 26.75 | 1299.595 | 1.3  |
| AHFZQPEYKU | 84 | 642.8075 | 2 | 27.99 | 1283.6   | 0.1  |
| SZLZZWENKU | 84 | 528.5765 | 3 | 34.53 | 1582.704 | 2.5  |
| AZLZZPEYKU | 83 | 509.9105 | 3 | 29.26 | 1526.703 | 4.6  |
| AZLZQWEYKU | 83 | 485.2364 | 3 | 42.67 | 1452.681 | 4.7  |
| AZFRQWENKU | 82 | 443.5575 | 3 | 22.43 | 1327.649 | 1.5  |
| AZLZZWENKU | 82 | 523.2454 | 3 | 33.87 | 1566.709 | 3.6  |
| AZLRQWZYKU | 81 | 373.1962 | 4 | 28.33 | 1488.749 | 4.3  |
| AHLRZWENKU | 79 | 448.5627 | 3 | 16.44 | 1342.675 | -6.2 |
| AZFZZPENKU | 79 | 504.8978 | 3 | 22.77 | 1511.667 | 3.2  |
| SZLRZPZYKU | 78 | 527.2649 | 3 | 19.43 | 1578.766 | 4.3  |
| AHLRQWENKU | 77 | 394.2137 | 3 | 16.84 | 1179.626 | -5.8 |
| AZFRZPZYKU | 77 | 533.2614 | 3 | 22.66 | 1596.756 | 4.1  |
| SHLRZPZYKU | 76 | 367.1899 | 4 | 16.07 | 1464.728 | 1.7  |
| AHLZQPEYKU | 76 | 625.8153 | 2 | 23.89 | 1249.616 | 0.1  |
| SHFRZPZYKU | 75 | 375.6859 | 4 | 18.41 | 1498.712 | 1.4  |
| SZFRZWENKU | 74 | 503.238  | 3 | 24.15 | 1506.692 | 0    |
| AZFRQPZYKU | 70 | 359.4358 | 4 | 20.54 | 1433.707 | 4.9  |
| SHFRQPZYKU | 67 | 334.9227 | 4 | 16.45 | 1335.664 | -1.7 |
| SZLRZWEYKU | 67 | 381.4389 | 4 | 31.65 | 1521.728 | -1.1 |
| SZLZQPZSKU | 66 | 493.2416 | 3 | 16.05 | 1476.693 | 6.6  |
| AHFRZPZYKU | 64 | 495.2473 | 3 | 19.42 | 1482.717 | 1.8  |
| AZLRZPZYKU | 64 | 391.7016 | 4 | 20.15 | 1562.771 | 3.8  |
| SHFRZPEYKU | 63 | 451.8883 | 3 | 18.05 | 1352.648 | -3.3 |
| SZFRZPEYKU | 56 | 367.6793 | 4 | 22.23 | 1466.686 | 1.3  |

## Synthesis and characterization of a 10<sup>8</sup>-member nucleobase peptide library

**Library design:** (X)<sub>9</sub>K-CONH<sub>2</sub> with X = 18 canonical amino acids (excluded Cys and Ile) & DabA, DabC, DabG, DabT, AlaA, AlaC, AlaG, AlaT, hAlaA, hAlaC, hAlaG, hAlaT.

### Library synthesis: SPPS:

2.2 g of 30 μm TentaGel resin (0.26 mmol/g, 0.74 mmol, 1.0 x 10<sup>8</sup> beads) was transferred to a 25 mL peptide synthesis vessel, swollen in DMF, and then washed with DMF (3x). Fmoc-Rink amide linker (5 eq) was dissolved in HATU solution (0.38 M in DMF) activated with DIEA (1.86 mL, 10.7 mmol) immediately prior to coupling, and added to resin bed. Coupling was performed for 20 min; after this time, resin was washed with DMF (100 mL). Fmoc removal was carried out by treatment of resin with 20% piperidine in DMF (1 x 30 mL flow wash; 1 x 15 mL, 5 min batch treatments). Resin was then washed with DMF (150 mL). Coupling of Fmoc-Lys(Boc)-OH, subsequent Fmoc removal, and DMF washes were performed in the same manner.

At this stage, resin was suspended in DMF (10 mL), and divided in two parts (20% and 80%, respectively). The 20% part was divided evenly among 12 x 10 mL fritted plastic syringes and the 80% part was divided evenly among 18 x 10 mL fritted plastic syringes using a 5 mL Eppendorf pipette. Couplings were performed according to the procedure described in "Peptide synthesis procedures". After coupling for 20 min, resins were washed with DMF (~10 mL ea.), poured back into a 25 mL synthesis vessel, and washed with DMF (100 mL). Fmoc removal was carried out by treatment of resin with 20% piperidine in DMF (1 x 30 mL flow wash; 1 x 15 mL, 5 min batch treatments). Resin was then washed with DMF (150 mL). Nine cycles of split-and-pool synthesis were performed using this procedure.

Cleavage and solid phase extraction were performed according to procedures described in section "Peptide synthesis procedures".

450 mg lyophilized powder (~60% crude yield) were obtained.

The library was dissolved in 1x PBS pH = 7.2 + 5% DMF, aliquoted and stored at – 80 °C.

**Library QC:** A 1.0 mg aliquot of library resin (from **Section 6.1**) was suspended in 1.0 mL of Milli-Q water and sonicated to achieve a homogenous suspension (theory: 3 x 10<sup>4</sup> beads/mL). A 20 μL aliquot (theory: 650 beads; 4 pmol/peptide) was transferred to a plastic tube, spun down, and supernatant removed. Beads were then subjected to nucleobase peptide cleavage conditions. TFA was then evaporated under a stream of nitrogen, and cleaved peptide was resuspended in Milli-Q water (0.1% TFA). Sample was purified over a C18 ZipTip® (0.6 μL, MilliporeSigma, P/N ZTC18S096), eluted in 30/70 water/acetonitrile (0.1% TFA), and lyophilized. Powder was resuspended in 20 μL of Milli-Q water (0.1% FA), and 0.5 μL (~100 fmol/peptide) was submitted for nLC-MS/MS analysis.

Library QC sample 1

*U = C-terminal amide, B = DabA, C = DabC, I = DabG, J = DabT, O = AlaA, U = AlaC, X = AlaG, Z = AlaT, b = hAlaA, c = hAlaC, i = hAlaG, j = hAlaT*

| <i>Peptide</i> | <i>ALC (%)</i> | <i>m/z</i> | <i>z</i> | <i>RT</i> | <i>Mass</i> | <i>ppm</i> |
|----------------|----------------|------------|----------|-----------|-------------|------------|
| HJbADFFEDKU    | 99             | 497.8781   | 3        | 43.69     | 1490.635    | -15        |
| CVQMFCAFDKU    | 99             | 669.7984   | 2        | 46.54     | 1337.596    | -10.4      |
| LOASAWAJFKU    | 98             | 454.8922   | 3        | 32.48     | 1361.67     | -10.9      |
| VDCTYCFNbKU    | 98             | 486.546    | 3        | 33.38     | 1456.633    | -11.2      |
| DGSVLYAFCKU    | 98             | 551.2668   | 2        | 49.42     | 1100.533    | -12.1      |
| GMFGGEYCSKU    | 98             | 409.1783   | 3        | 51.16     | 1224.53     | -13.5      |
| GVVEPMFbVKU    | 98             | 408.2183   | 3        | 68.03     | 1221.64     | -5.5       |
| TCSSNAEBiKU    | 97             | 449.8585   | 3        | 24.64     | 1346.559    | -4.2       |
| DQGjDLXVKKU    | 97             | 444.2195   | 3        | 25.73     | 1329.651    | -10.6      |
| DSTCAYGAVKU    | 97             | 338.4905   | 3        | 27.2      | 1012.465    | -15        |
| DMSTCAKFIKU    | 97             | 440.8616   | 3        | 27.32     | 1319.585    | -17        |
| QAPELLjEGKU    | 97             | 398.2072   | 3        | 29.94     | 1191.622    | -18.6      |
| DDHDYGVOQKU    | 97             | 427.1839   | 3        | 33.26     | 1278.549    | -14.8      |
| YKYEGTjPCKU    | 97             | 482.2274   | 3        | 33.44     | 1443.682    | -14.8      |
| ITEGAKWTRKU    | 97             | 456.2318   | 3        | 35.03     | 1365.7      | -19.8      |
| CFYNDjTXGKU    | 97             | 527.5525   | 3        | 40.09     | 1579.657    | -13.7      |
| DMTCVVKFTKU    | 97             | 390.8661   | 3        | 41.13     | 1169.594    | -14.8      |
| TjhjJGEAYKU    | 97             | 496.8826   | 3        | 42.2      | 1487.644    | -12        |
| PMAEDEAYTKU    | 97             | 577.2566   | 2        | 47.46     | 1152.512    | -11.8      |
| YVNMLYTCAKU    | 97             | 402.1944   | 3        | 47.54     | 1203.578    | -14        |
| PAGVPMWWDKU    | 97             | 395.8594   | 3        | 49.31     | 1184.58     | -20.1      |
| AGQOGPBLcKU    | 97             | 671.8226   | 2        | 52.28     | 1341.657    | -19.7      |
| LEFALLARHKU    | 97             | 399.5758   | 3        | 53.32     | 1195.719    | -11.2      |
| MPVADGVJRKU    | 96             | 413.2117   | 3        | 23.55     | 1236.635    | -17.7      |
| TDZADRNAAKU    | 96             | 385.8484   | 3        | 27.4      | 1154.543    | -16.6      |
| jQcDYHWATKU    | 96             | 484.2166   | 3        | 36.32     | 1449.648    | -13.5      |
| IYGMDELQKKU    | 96             | 467.8851   | 3        | 40.52     | 1400.661    | -19.8      |
| LKGYSNADjKU    | 96             | 401.8675   | 3        | 40.55     | 1202.601    | -17.2      |
| TCDTWYTKXKU    | 96             | 455.5405   | 3        | 42.49     | 1363.609    | -7         |
| NMFLRCRYVKU    | 96             | 443.5684   | 3        | 46.21     | 1327.7      | -12.9      |
| PMAPMCPYTKU    | 96             | 569.259    | 2        | 47.35     | 1136.518    | -12.8      |
| EGSYTciTKKU    | 96             | 447.5533   | 3        | 49.56     | 1339.636    | 2          |
| JSNjDALPDKU    | 96             | 667.2993   | 2        | 53.21     | 1332.598    | -10.8      |
| FTFQSMQMMKU    | 96             | 639.2849   | 2        | 69.43     | 1276.577    | -16.8      |
| VjFGWEIVKU     | 96             | 498.2304   | 3        | 71.77     | 1491.697    | -18.3      |
| EMADYQSViKU    | 96             | 652.2917   | 2        | 80.55     | 1302.578    | -7         |
| PRJZRQGEJKU    | 95             | 532.9215   | 3        | 23.88     | 1595.758    | -9.5       |

|              |    |          |   |       |          |       |
|--------------|----|----------|---|-------|----------|-------|
| VECSLHWVYKU  | 95 | 470.9064 | 3 | 31.09 | 1409.716 | -13   |
| EMZASMDMDKU  | 95 | 417.8246 | 3 | 31.12 | 1250.473 | -16.6 |
| TNFCTJANJKU  | 95 | 458.1997 | 3 | 32.19 | 1371.592 | -10.3 |
| LOASAQEJFKU  | 95 | 454.8914 | 3 | 32.75 | 1361.654 | -1.5  |
| PYRFTCPPGKU  | 95 | 388.8654 | 3 | 32.84 | 1163.591 | -14.2 |
| DPMCCVSEVKU  | 95 | 419.8554 | 3 | 33.07 | 1256.559 | -11.9 |
| DDHYDGVZHKU  | 95 | 427.1839 | 3 | 33.1  | 1278.538 | -6.2  |
| QbEVJSEVEKU  | 95 | 477.5577 | 3 | 33.49 | 1429.661 | -6.7  |
| MNCFVALBRKU  | 95 | 452.5613 | 3 | 33.57 | 1354.68  | -13.5 |
| VGANDSJAMKU  | 95 | 550.7554 | 2 | 41.93 | 1099.505 | -8.1  |
| TjHjYCWAYKU  | 95 | 496.8824 | 3 | 42.27 | 1487.635 | -6.1  |
| FQLTBVAPVKU  | 95 | 319.9297 | 4 | 44.87 | 1275.714 | -19.1 |
| GMVQWQWKMKU  | 95 | 440.894  | 3 | 50.43 | 1319.663 | -2.3  |
| PLYDGETGEKU  | 95 | 554.2612 | 2 | 55.09 | 1106.524 | -14.9 |
| UDPYQNKQYKU  | 95 | 681.8253 | 2 | 63.95 | 1361.648 | -8.5  |
| NCSMAADcJKU  | 95 | 723.8056 | 2 | 64.19 | 1445.609 | -8.8  |
| TjFjJADAYKU  | 95 | 749.8266 | 2 | 65.95 | 1497.653 | -9.8  |
| ACGVQWWXLKU  | 95 | 437.2103 | 3 | 66.97 | 1308.63  | -15.7 |
| FDFLKZMSSKU  | 95 | 432.8791 | 3 | 70.11 | 1295.633 | -13.8 |
| TPSLVADTFKU  | 95 | 539.2932 | 2 | 73.29 | 1076.587 | -13.7 |
| FFAGYLVGXXKU | 95 | 610.8096 | 2 | 73.7  | 1219.625 | -16.7 |
| FFTMLTKIHKU  | 95 | 481.5804 | 3 | 77.39 | 1441.739 | -13.7 |
| SGMDTTUbrKU  | 94 | 431.5294 | 3 | 25.28 | 1291.591 | -18.8 |
| HEMJSMDMDKU  | 94 | 463.5095 | 3 | 27.34 | 1387.528 | -15.2 |
| EMDKSQPGEKU  | 94 | 383.1786 | 3 | 30.14 | 1146.534 | -17.4 |
| VECSLKNUYKU  | 94 | 470.9061 | 3 | 31.04 | 1409.712 | -10.8 |
| KVFQIWVGT KU | 94 | 461.5847 | 3 | 31.35 | 1381.736 | -2.6  |
| LOVLVDQDQKU  | 94 | 420.898  | 3 | 32.46 | 1259.673 | -1    |
| GYFOWRTGDKU  | 94 | 444.8757 | 3 | 34.79 | 1331.627 | -16.5 |
| DYDTDQFYNKU  | 94 | 436.5208 | 3 | 40.49 | 1306.547 | -4.7  |
| ODTADYTKXKU  | 94 | 455.5395 | 3 | 42.77 | 1363.613 | -11.8 |
| CVGQEGYJMKU  | 94 | 476.5453 | 3 | 48.75 | 1426.632 | -12.5 |
| YZFCDFASEKU  | 94 | 652.2653 | 2 | 49.32 | 1302.534 | -13.7 |
| TPSLVJGTFKU  | 94 | 405.5487 | 3 | 56.89 | 1213.641 | -13.9 |
| DFILENDSEKU  | 94 | 462.8654 | 3 | 58.95 | 1385.595 | -14.8 |
| WLKLIMYIAKU  | 94 | 545.2761 | 3 | 61.12 | 1632.819 | -7.8  |
| GbDDYVLLQKU  | 94 | 423.216  | 3 | 65.06 | 1266.642 | -12.8 |
| SSGVQEGWLKU  | 94 | 545.2793 | 2 | 67.88 | 1088.562 | -16.1 |
| bCFLSVDYNKU  | 94 | 435.8759 | 3 | 73.92 | 1304.604 | 1.5   |
| ZQTCMEQSDKU  | 93 | 632.2498 | 2 | 24.08 | 1262.502 | -13.4 |
| WbTFAVGGKKU  | 93 | 404.2153 | 3 | 25.73 | 1209.648 | -19.3 |
| XiHWAARAGKU  | 93 | 338.1688 | 4 | 26.07 | 1348.652 | -4    |
| LEGEQRTjKKU  | 93 | 432.8966 | 3 | 26.67 | 1295.692 | -18.3 |
| LNSPZDCVEKU  | 93 | 599.7719 | 2 | 27.85 | 1197.545 | -13.2 |
| KEYDYNVXEKU  | 93 | 352.4145 | 4 | 28.37 | 1405.638 | -6.1  |

|             |    |          |   |       |          |       |
|-------------|----|----------|---|-------|----------|-------|
| ADQSMSTVFKU | 93 | 371.5124 | 3 | 29.27 | 1111.533 | -16.1 |
| DVGWJEIGVKU | 93 | 482.5495 | 3 | 33.72 | 1444.654 | -19.1 |
| jTUGKbCRMKU | 93 | 477.2228 | 3 | 35.64 | 1428.665 | -13   |
| ccFGVYMADKU | 93 | 439.8673 | 3 | 36.1  | 1316.602 | -16.6 |
| TCCVLETjIKU | 93 | 496.2341 | 3 | 38.51 | 1485.682 | -1.3  |
| POMPNAVjJKU | 93 | 428.2056 | 3 | 40.37 | 1281.612 | -13.1 |
| CTNDHFFTYKU | 93 | 425.519  | 3 | 41.42 | 1273.555 | -15.5 |
| DGQXKTADOKU | 93 | 429.1969 | 3 | 43.17 | 1284.582 | -10   |
| FADESVBLVKU | 93 | 427.8877 | 3 | 62.19 | 1280.657 | -12   |
| cHEFPAPMRKU | 93 | 435.8859 | 3 | 63.13 | 1304.653 | -12.9 |
| ijDATMPEGKU | 93 | 645.7826 | 2 | 64.61 | 1289.555 | -3.1  |
| EGOLNAYADKU | 93 | 395.1899 | 3 | 65.26 | 1182.553 | -4.2  |
| FDFLKYCFSKU | 93 | 432.8796 | 3 | 68.89 | 1295.637 | -15.7 |
| CVEAVKAAJKU | 93 | 425.5674 | 3 | 73.6  | 1273.681 | -0.9  |
| CPELWLDDAKU | 93 | 594.7892 | 2 | 82.07 | 1187.565 | -0.4  |
| NLGEYXOGFKU | 93 | 675.8098 | 2 | 83.05 | 1349.613 | -5.5  |
| EMDAYQSFiku | 93 | 676.2924 | 2 | 91.72 | 1350.578 | -5.9  |
| VPGLVLCQQKU | 92 | 305.1761 | 4 | 25.04 | 1216.699 | -19.8 |
| VEIRVRjADKU | 92 | 491.2498 | 3 | 28.32 | 1470.752 | -16.3 |
| bVVLVDGWQKU | 92 | 420.8978 | 3 | 32.35 | 1259.684 | -9.9  |
| MGMjEOCLKKU | 92 | 451.2036 | 3 | 34.35 | 1350.608 | -13.9 |
| XAPOVYMADKU | 92 | 439.8667 | 3 | 36.13 | 1316.595 | -12.4 |
| XiGMEDLQKKU | 92 | 467.8853 | 3 | 40.6  | 1400.648 | -10.4 |
| CVGAMSyBDKU | 92 | 446.867  | 3 | 46.57 | 1337.596 | -12.1 |
| DFQLEQCTFKU | 92 | 419.8625 | 3 | 61.34 | 1256.586 | -16   |
| UPHPYSKLEKU | 92 | 426.5623 | 3 | 63.33 | 1276.668 | -1.8  |
| MMFLKYCFSKU | 92 | 432.8787 | 3 | 70.27 | 1295.623 | -6.6  |
| VPLLcADBKU  | 92 | 661.8654 | 2 | 92.72 | 1321.728 | -8.5  |
| TYQTFQPGVKU | 91 | 389.8689 | 3 | 26.82 | 1166.608 | -20.2 |
| KYCTBGQJYKU | 91 | 510.8956 | 3 | 26.96 | 1529.684 | -12.7 |
| KTHQDMiMWKU | 91 | 479.8886 | 3 | 29.85 | 1436.656 | -8.4  |
| INEMIVSPSKU | 91 | 491.552  | 3 | 32.28 | 1471.647 | -8.7  |
| VDTCYCFHZKU | 91 | 486.546  | 3 | 33.47 | 1456.626 | -6.8  |
| AJcDYHAWTKU | 91 | 484.2182 | 3 | 36.39 | 1449.646 | -9.1  |
| LYDISVMGRKU | 91 | 340.4185 | 4 | 38.59 | 1357.667 | -16   |
| HHQDMjFGOKU | 91 | 471.2018 | 3 | 41.86 | 1410.608 | -17.4 |
| PLYDZQTGEKU | 91 | 415.5276 | 3 | 42.34 | 1243.583 | -18   |
| BNWQcYRGNKU | 91 | 511.9114 | 3 | 43.18 | 1532.715 | -1.9  |
| MFAQPGMQFKU | 91 | 592.2835 | 2 | 49.21 | 1182.568 | -13   |
| MGMjEXQKKKU | 91 | 469.8891 | 3 | 50.01 | 1406.663 | -12.3 |
| FGSLbGSPEKU | 91 | 569.7822 | 2 | 56.53 | 1137.564 | -11.9 |
| VcEQCTEVYKU | 91 | 720.3445 | 2 | 60.76 | 1438.687 | -8.8  |
| LZSMLTZjLKU | 91 | 468.5686 | 3 | 62.65 | 1402.7   | -11.2 |
| SDLAScZDSKU | 91 | 605.7681 | 2 | 74.97 | 1209.534 | -10.4 |
| MEDAYQSWiKU | 91 | 695.7971 | 2 | 91.38 | 1389.589 | -6.6  |

|              |    |          |   |       |          |       |
|--------------|----|----------|---|-------|----------|-------|
| ZPFLQNQAKKU  | 90 | 423.2333 | 3 | 24.6  | 1266.683 | -4.1  |
| PSGFCGYAGKU  | 90 | 493.2245 | 2 | 25.33 | 984.4487 | -14.5 |
| VYGNHLQHPKU  | 90 | 397.8793 | 3 | 27.03 | 1190.631 | -12.5 |
| PMIRVRjADKU  | 90 | 491.2498 | 3 | 28.33 | 1470.734 | -4.2  |
| YASPETAHFKU  | 90 | 383.8586 | 3 | 28.43 | 1148.562 | -6.5  |
| YTNCQQWEKU   | 90 | 468.198  | 3 | 33.93 | 1401.6   | -19.5 |
| LLEDMLANLKU  | 90 | 290.4155 | 4 | 34.28 | 1157.648 | -12.9 |
| QBPXGYDMKU   | 90 | 499.2083 | 3 | 38.9  | 1494.626 | -15.5 |
| GGEDGRLLVKU  | 90 | 348.2002 | 3 | 39.93 | 1041.593 | -13.6 |
| XiGMNNLQKKU  | 90 | 462.5545 | 3 | 40.4  | 1384.665 | -16.8 |
| MKVLTCNVMKU  | 90 | 389.2113 | 3 | 41.49 | 1164.618 | -5.3  |
| DYEDJGVNFKU  | 90 | 451.199  | 3 | 42.36 | 1350.58  | -3.3  |
| BDIGKAFDAKU  | 90 | 472.8883 | 3 | 49.75 | 1415.649 | -3.9  |
| KGMLFjjVDKU  | 90 | 452.2285 | 3 | 50.38 | 1353.68  | -12.3 |
| KTSLFjQUDKU  | 90 | 452.2279 | 3 | 50.52 | 1353.676 | -10.4 |
| KFXCLRIEFKU  | 90 | 527.5922 | 3 | 55.51 | 1579.768 | -8.5  |
| ZWAOVISYFKU  | 90 | 530.5729 | 3 | 58.13 | 1588.718 | -13   |
| MMQLEQTCFKU  | 90 | 419.8619 | 3 | 61.24 | 1256.572 | -6.1  |
| FBEFJADRFKU  | 90 | 400.6863 | 4 | 63.43 | 1598.739 | -14.2 |
| VFQZMDSZLKU  | 90 | 678.8128 | 2 | 69.63 | 1355.629 | -13.3 |
| YNETTYDTEKU  | 90 | 631.7781 | 2 | 71.2  | 1261.546 | -3.5  |
| NLEGYXFGOKU  | 90 | 675.8093 | 2 | 83.26 | 1349.613 | -6.3  |
| KiSLOHAIYKU  | 90 | 506.5835 | 3 | 88.87 | 1516.742 | -8.7  |
| PYFNRpSSKU   | 89 | 322.9151 | 4 | 24.32 | 1287.644 | -10   |
| UBGVENEfHKU  | 89 | 471.8797 | 3 | 26.8  | 1412.639 | -15.2 |
| YVKGJCRENKU  | 89 | 378.1918 | 4 | 27.65 | 1508.751 | -8.1  |
| MCSTLENMCKU  | 89 | 436.1882 | 3 | 28.12 | 1305.558 | -11.8 |
| WDEDHAFVGKU  | 89 | 401.5187 | 3 | 28.19 | 1201.552 | -14.4 |
| KGRTUPMTN KU | 89 | 404.5456 | 3 | 31.01 | 1210.635 | -16.7 |
| PKjETAEPGKU  | 89 | 388.8654 | 3 | 32.84 | 1163.591 | -14   |
| GVTPGAZFEKU  | 89 | 367.1838 | 3 | 36.14 | 1098.546 | -14.8 |
| WFKNMGNYDKU  | 89 | 434.5359 | 3 | 36.96 | 1300.602 | -12.7 |
| PTSCTSIFWKU  | 89 | 449.532  | 3 | 40.01 | 1345.598 | -17.4 |
| CVQMCYAFDKU  | 89 | 452.1984 | 3 | 46.64 | 1353.591 | -13.1 |
| WVBYDNFMGKU  | 89 | 478.5509 | 3 | 47.43 | 1432.64  | -6.4  |
| ETNMZIGFJKU  | 89 | 526.5522 | 3 | 48.54 | 1576.654 | -12.1 |
| HQDUGCFNFKU  | 89 | 637.7726 | 2 | 48.82 | 1273.541 | -8.2  |
| MYGFMTSTCKU  | 89 | 584.2464 | 2 | 50.43 | 1166.492 | -12   |
| DVTTGbwFGKU  | 89 | 409.867  | 3 | 50.91 | 1226.59  | -8.9  |
| HDBLEQCTFKU  | 89 | 465.5481 | 3 | 51.11 | 1393.625 | -1.8  |
| MVAFUVHTLKU  | 89 | 408.8902 | 3 | 52.5  | 1223.66  | -8.9  |
| EGQFDAESKKU  | 89 | 379.8546 | 3 | 54    | 1136.546 | -3.6  |
| FTFQMCQDFKU  | 89 | 647.2827 | 2 | 54.9  | 1292.568 | -13.3 |
| FSjDATDEWKU  | 89 | 653.778  | 2 | 56.12 | 1305.56  | -14   |
| WGDSDYTAQKU  | 89 | 585.259  | 2 | 58.28 | 1168.515 | -9.7  |

|                    |    |          |   |       |          |       |
|--------------------|----|----------|---|-------|----------|-------|
| <b>DXbLENDSEKU</b> | 89 | 462.865  | 3 | 59.13 | 1385.577 | -3.1  |
| <b>VFQZMDSALKU</b> | 89 | 616.8004 | 2 | 64.63 | 1231.602 | -12.9 |
| <b>OGMYFjLOcKU</b> | 89 | 784.8489 | 2 | 66.93 | 1567.705 | -14   |
| <b>PUETTYDTEKU</b> | 89 | 631.778  | 2 | 71.28 | 1261.557 | -12.6 |
| <b>WMAYDEEMMKU</b> | 89 | 666.7696 | 2 | 83.19 | 1331.535 | -7.7  |
| <b>KDHMPDWHDKU</b> | 88 | 436.5341 | 3 | 23.22 | 1306.588 | -5.4  |
| <b>GVSHMPDiOKU</b> | 88 | 436.5341 | 3 | 23.27 | 1306.585 | -3.8  |
| <b>EDVADRAOFKU</b> | 88 | 418.5429 | 3 | 23.65 | 1252.606 | 0.7   |
| <b>YNSLMNiMEKU</b> | 88 | 454.8643 | 3 | 26.89 | 1361.597 | -19.4 |
| <b>GXSLMNiMEKU</b> | 88 | 454.864  | 3 | 26.98 | 1361.584 | -9.8  |
| <b>LGYAETTSMKU</b> | 88 | 367.1816 | 3 | 28.75 | 1098.538 | -13.5 |
| <b>STADAKWTRKU</b> | 88 | 388.209  | 3 | 30.09 | 1161.626 | -17.6 |
| <b>PNLRCQMGTKU</b> | 88 | 382.8637 | 3 | 31.63 | 1145.58  | -9.1  |
| <b>KARMMPANLKU</b> | 88 | 386.8847 | 3 | 33.91 | 1157.653 | -17.5 |
| <b>bGSTLDWJEKU</b> | 88 | 473.5492 | 3 | 36.18 | 1417.64  | -10   |
| <b>GVSFMPDiOKU</b> | 88 | 439.8704 | 3 | 37.84 | 1316.595 | -4.3  |
| <b>KDEQXXYDMKU</b> | 88 | 499.2081 | 3 | 39.16 | 1494.617 | -9.7  |
| <b>OSXMNNLQKKU</b> | 88 | 462.5541 | 3 | 40.67 | 1384.664 | -17.3 |
| <b>AEEAPLAAAKU</b> | 88 | 485.2659 | 2 | 43.13 | 968.5291 | -12.3 |
| <b>ALDMDYjMEKU</b> | 88 | 441.856  | 3 | 44.62 | 1322.561 | -10.8 |
| <b>IGejAVNJSKU</b> | 88 | 490.5491 | 3 | 44.65 | 1468.648 | -15   |
| <b>PLYDOYGGEKU</b> | 88 | 415.5272 | 3 | 44.87 | 1243.573 | -10.9 |
| <b>iPSZFDGVGKU</b> | 88 | 412.1923 | 3 | 46.33 | 1233.565 | -7.7  |
| <b>jMMSGDZSLKU</b> | 88 | 424.5179 | 3 | 50.07 | 1270.541 | -6.8  |
| <b>UNMSMYDDEKU</b> | 88 | 656.2488 | 2 | 54.17 | 1310.502 | -14.4 |
| <b>ZWAFRBCYFKU</b> | 88 | 530.5732 | 3 | 57.89 | 1588.72  | -13.9 |
| <b>VYADTYVNAKU</b> | 88 | 571.7902 | 2 | 58.46 | 1141.577 | -9.5  |
| <b>DFIQNNMAEKU</b> | 88 | 693.7954 | 2 | 59.15 | 1385.589 | -8.9  |
| <b>EZDMSEMENKU</b> | 88 | 653.7473 | 2 | 59.99 | 1305.497 | -12.7 |
| <b>GLDNLVbOZKU</b> | 88 | 458.8907 | 3 | 62.15 | 1373.677 | -19.4 |
| <b>EGFESVBLVKU</b> | 88 | 427.8863 | 3 | 62.31 | 1280.657 | -15.2 |
| <b>VTLYZTAXEKU</b> | 88 | 669.825  | 2 | 73.88 | 1337.648 | -9.1  |
| <b>DSVFLZMYTKU</b> | 88 | 649.3071 | 2 | 77.47 | 1296.617 | -13.5 |
| <b>FMAWLGYDQKU</b> | 88 | 629.2974 | 2 | 90.75 | 1256.601 | -16.6 |
| <b>GbTVQSMMTKU</b> | 87 | 400.5235 | 3 | 25.27 | 1198.565 | -13.9 |
| <b>TDCTBKELYKU</b> | 87 | 458.8841 | 3 | 27.94 | 1373.645 | -10.5 |
| <b>TGGANGWYiKU</b> | 87 | 396.1849 | 3 | 27.96 | 1185.544 | -8.9  |
| <b>QRPANLLACKU</b> | 87 | 420.9104 | 3 | 27.98 | 1259.716 | -5.4  |
| <b>HPCFQDPSWKU</b> | 87 | 348.6682 | 4 | 30.88 | 1390.648 | -3.4  |
| <b>KARTEEANLKU</b> | 87 | 386.8847 | 3 | 34.13 | 1157.652 | -16.7 |
| <b>GDQXKTGEOKU</b> | 87 | 429.198  | 3 | 39.87 | 1284.582 | -7.4  |
| <b>MFEDYCRNFKU</b> | 87 | 676.2947 | 2 | 42.4  | 1350.585 | -7.5  |
| <b>VBibXNLGLKU</b> | 87 | 412.4495 | 4 | 42.66 | 1645.795 | -15.8 |
| <b>EAFQMGFTQKU</b> | 87 | 593.2818 | 2 | 43.89 | 1184.565 | -13.2 |
| <b>PLYDJGTGEKU</b> | 87 | 415.5267 | 3 | 44.52 | 1243.579 | -16.6 |



|              |    |          |   |       |          |       |
|--------------|----|----------|---|-------|----------|-------|
| LWPEOSKGGKU  | 87 | 319.6807 | 4 | 51.19 | 1274.7   | -4.5  |
| MFEDFBVNFKU  | 87 | 484.2203 | 3 | 51.71 | 1449.655 | -11.2 |
| EKYFADZNMKU  | 87 | 447.2    | 3 | 54.11 | 1338.603 | -18.2 |
| EKYFGEcDMKU  | 87 | 670.2972 | 2 | 54.15 | 1338.599 | -14.5 |
| EDLGYQADGKU  | 87 | 547.7515 | 2 | 54.4  | 1093.504 | -14.2 |
| GVUQLRIEFKU  | 87 | 482.9147 | 3 | 55.18 | 1445.738 | -10.8 |
| TCNDPFFTYKU  | 87 | 617.7737 | 2 | 55.96 | 1233.549 | -13   |
| GLBWEYQPFKU  | 87 | 361.1819 | 4 | 56.35 | 1440.699 | -0.6  |
| EMGEYAGSiKU  | 87 | 602.7598 | 2 | 66.55 | 1203.51  | -4    |
| WUSSYjAEFKU  | 87 | 703.3098 | 2 | 67.35 | 1404.618 | -9.4  |
| FMMLKYCFSKU  | 87 | 432.8794 | 3 | 68.98 | 1295.623 | -4.9  |
| PTHEFFWELKU  | 86 | 333.9173 | 4 | 23.94 | 1331.666 | -19.6 |
| LNSPADVCEKU  | 86 | 537.7586 | 2 | 24.48 | 1073.518 | -13.9 |
| GXSLMQMXEKU  | 86 | 454.8643 | 3 | 26.89 | 1361.583 | -8.7  |
| URQLFHYEFKU  | 86 | 362.4372 | 4 | 28.85 | 1445.732 | -8.2  |
| DMSOAKIMIKU  | 86 | 532.5631 | 3 | 29.05 | 1594.684 | -10.1 |
| FOESQDFFHKU  | 86 | 463.2067 | 3 | 30.86 | 1386.622 | -16.9 |
| FVKFTCPGNKU  | 86 | 570.2979 | 2 | 32.18 | 1138.596 | -12.7 |
| DRWCYEIGVKU  | 86 | 482.5495 | 3 | 33.73 | 1444.641 | -9.8  |
| VECTARZVYKU  | 86 | 470.9066 | 3 | 33.85 | 1409.712 | -9.7  |
| VCQVFSNPMKU  | 86 | 433.8851 | 3 | 35.4  | 1298.651 | -13.1 |
| DDPVVEDKLU   | 86 | 386.2041 | 3 | 36.69 | 1155.614 | -20   |
| SGMDCVCFRKU  | 86 | 431.5307 | 3 | 38.32 | 1291.587 | -12.6 |
| PPMGGANVJKU  | 86 | 539.7701 | 2 | 38.57 | 1077.536 | -9.4  |
| PYNNWGECKU   | 86 | 471.8884 | 3 | 38.83 | 1412.665 | -15.3 |
| DGQXQTFWFGKU | 86 | 429.1984 | 3 | 40.19 | 1284.575 | -1.1  |
| KDDRkjVDMKU  | 86 | 448.2313 | 3 | 40.74 | 1341.679 | -5.4  |
| VMGLTDXNLKU  | 86 | 605.3067 | 2 | 41.6  | 1208.608 | -7.9  |
| MFEDCYRNFKU  | 86 | 451.1982 | 3 | 47.03 | 1350.585 | -8.9  |
| WLIYSDSDKKU  | 86 | 477.889  | 3 | 47.6  | 1430.668 | -16   |
| TLKMNLKTGKU  | 86 | 378.229  | 3 | 48.04 | 1131.68  | -12.9 |
| FQLFOVAPVKU  | 86 | 417.9017 | 3 | 48.34 | 1250.704 | -16.3 |
| FMAMWEjRCKU  | 86 | 470.5421 | 3 | 60.94 | 1408.617 | -9.1  |
| FBEFYCWRFKU  | 86 | 400.6863 | 4 | 63.44 | 1598.729 | -8.2  |
| PWCWFNKYEKU  | 86 | 467.2177 | 3 | 64    | 1398.654 | -16.5 |
| FSjDATEDWku  | 86 | 653.7798 | 2 | 64.83 | 1305.56  | -11.1 |
| TCNDFFFTYKU  | 86 | 642.7814 | 2 | 67.01 | 1283.565 | -12.6 |
| NAAGSDTHGKU  | 86 | 478.726  | 2 | 71.12 | 955.4471 | -10.2 |
| NEGOJGYDQKU  | 86 | 460.5227 | 3 | 76.87 | 1378.572 | -18.6 |
| ETGEVHcIKU   | 86 | 735.3369 | 2 | 78.62 | 1468.667 | -5.2  |
| YDYDCVPTMKU  | 86 | 691.3022 | 2 | 92.36 | 1380.608 | -13.4 |
| jLVGQAPRIKU  | 85 | 342.6861 | 4 | 24.24 | 1366.729 | -10.3 |
| GPSibVTVEKU  | 85 | 331.9164 | 4 | 28.5  | 1323.649 | -9.6  |
| KTHQXEMMWKU  | 85 | 479.8886 | 3 | 29.75 | 1436.655 | -7.8  |
| ZVGESDBFHku  | 85 | 463.2068 | 3 | 30.95 | 1386.612 | -9.5  |

|             |    |          |   |       |          |       |
|-------------|----|----------|---|-------|----------|-------|
| DDHFADTOQKU | 85 | 427.1839 | 3 | 33.27 | 1278.549 | -14.8 |
| CVLEPCWSAKU | 85 | 641.8127 | 2 | 37    | 1281.624 | -10.3 |
| GVVKQWWOWKU | 85 | 473.9196 | 3 | 37.11 | 1418.747 | -7.2  |
| VGANDSjSMKU | 85 | 558.7521 | 2 | 42.01 | 1115.5   | -9.2  |
| CPFQSTFTQKU | 85 | 593.2819 | 2 | 44.08 | 1184.565 | -13.1 |
| DKVILRAEDKU | 85 | 455.2394 | 3 | 45.54 | 1362.711 | -10.4 |
| bWQMMPjDQKU | 85 | 497.2162 | 3 | 47.24 | 1488.643 | -10.8 |
| FTbGSMQDFKU | 85 | 426.5239 | 3 | 47.99 | 1276.573 | -17.8 |
| FQLRMYAPVKU | 85 | 417.9019 | 3 | 48.42 | 1250.696 | -9.6  |
| PAFjYNUGEKU | 85 | 438.5297 | 3 | 50.05 | 1312.592 | -18.6 |
| XUDETLEQjKU | 85 | 490.8815 | 3 | 50.33 | 1469.637 | -9.4  |
| PDEGAGFTAKU | 85 | 496.2384 | 2 | 50.96 | 990.477  | -14.9 |
| YDLVTSjFCKU | 85 | 642.2972 | 2 | 54.6  | 1282.599 | -14.6 |
| UGVQLRIEFKU | 85 | 482.9146 | 3 | 55.29 | 1445.738 | -11.1 |
| GLBWEYRLCKU | 85 | 361.1818 | 4 | 56.25 | 1440.714 | -10.9 |
| EFFYBNNNEKU | 85 | 493.5451 | 3 | 57.92 | 1477.643 | -19.9 |
| RWMGCRCLYKU | 85 | 488.2416 | 3 | 63.94 | 1461.719 | -10.8 |
| XGSSIECFBKU | 85 | 564.2339 | 3 | 65.84 | 1689.7   | -12.1 |
| MMEMSLSSSKU | 85 | 565.2477 | 2 | 66.71 | 1128.498 | -14.9 |
| NAAGAZSSGKU | 85 | 478.726  | 2 | 71.12 | 955.4471 | -10.2 |
| FOQAVKAAjKU | 85 | 425.5672 | 3 | 73.77 | 1273.676 | 2.7   |
| NBRTCLVFQKU | 85 | 461.5719 | 3 | 77.73 | 1381.709 | -10.9 |
| EMADYQSYIKU | 85 | 684.2884 | 2 | 79.55 | 1366.573 | -7.9  |
| NENDGYVLOKU | 85 | 627.796  | 2 | 80.08 | 1253.59  | -10   |
| SPLVLNAcHKU | 85 | 586.3288 | 2 | 83.36 | 1170.659 | -13.6 |
| NDGTRKCQTKU | 84 | 383.8601 | 3 | 24.98 | 1148.572 | -11.7 |
| SYRGWYWORKU | 84 | 376.9377 | 4 | 25.1  | 1503.738 | -11.2 |
| KSMUYVLMSKU | 84 | 422.5512 | 3 | 25.13 | 1264.642 | -8.1  |
| ENSDCYGALKU | 84 | 549.7458 | 2 | 25.85 | 1097.481 | -3.7  |
| ZYPVGEDBHKU | 84 | 471.8783 | 3 | 26.94 | 1412.627 | -10.2 |
| MSVVAHNNEKU | 84 | 376.5224 | 3 | 29.98 | 1126.555 | -8.8  |
| YVGPPGEDQKU | 84 | 544.7659 | 2 | 37    | 1087.53  | -11.6 |
| cOYNDJTXGKU | 84 | 527.5525 | 3 | 40.09 | 1579.645 | -5.8  |
| KDDPQFPNSKU | 84 | 392.196  | 3 | 40.43 | 1173.578 | -9.9  |
| VGANADsjMKU | 84 | 550.7546 | 2 | 42.25 | 1099.505 | -9.5  |
| OSEJAVNJSKU | 84 | 735.3207 | 2 | 44.53 | 1468.647 | -13.6 |
| AOLTBVAPVKU | 84 | 319.9303 | 4 | 44.98 | 1275.7   | -6.1  |
| LNDMSCZDRKU | 84 | 425.8555 | 3 | 48.81 | 1274.55  | -3.8  |
| ICCFTLEQjKU | 84 | 490.8817 | 3 | 50.16 | 1469.626 | -1.5  |
| GYDDFMPNSKU | 84 | 586.7479 | 2 | 55.09 | 1171.497 | -13.4 |
| PXYQADYXAKU | 84 | 697.804  | 2 | 56.32 | 1393.602 | -6.4  |
| PGYYQEGYAKU | 84 | 587.7711 | 2 | 56.56 | 1173.545 | -15.1 |
| FUXENCREGKU | 84 | 510.5565 | 3 | 56.75 | 1528.673 | -16.6 |
| LNRiLAASDKU | 84 | 407.5594 | 3 | 58.71 | 1219.654 | 1.8   |
| MYGFMTLNMKU | 84 | 412.1919 | 3 | 63.15 | 1233.571 | -13.7 |

|                     |    |          |   |       |          |       |
|---------------------|----|----------|---|-------|----------|-------|
| <b>ObEFJGRFKU</b>   | 84 | 533.9131 | 3 | 63.44 | 1598.726 | -5.3  |
| <b>LTFEGESKKU</b>   | 84 | 411.5445 | 3 | 63.6  | 1231.62  | -6.4  |
| <b>ijDATDEMSKU</b>  | 84 | 669.7747 | 2 | 64.81 | 1337.54  | -3.5  |
| <b>FFAGYLXGSKU</b>  | 84 | 589.787  | 2 | 66.55 | 1177.578 | -15.6 |
| <b>FFAGYLEXSKU</b>  | 84 | 625.796  | 2 | 68.88 | 1249.599 | -17.3 |
| <b>MWLBbCDFLKU</b>  | 84 | 516.5708 | 3 | 69.43 | 1546.708 | -11.4 |
| <b>VFQZMMAQUKU</b>  | 84 | 678.8126 | 2 | 69.9  | 1355.623 | -9    |
| <b>FBEMFJWVOKU</b>  | 84 | 433.4458 | 4 | 71.33 | 1729.769 | -8.9  |
| <b>TEEGWVHcIKU</b>  | 84 | 735.3368 | 2 | 78.54 | 1468.667 | -5.3  |
| <b>WMAYDQNM MKU</b> | 84 | 658.7725 | 2 | 83.05 | 1315.551 | -15.9 |
| <b>FFAXLGENYKU</b>  | 84 | 654.3129 | 2 | 85.41 | 1306.621 | -7.1  |
| <b>OQWWGELN MKU</b> | 84 | 697.8178 | 2 | 86.7  | 1393.646 | -18.1 |
| <b>KPRARENUEKU</b>  | 83 | 436.236  | 3 | 24.45 | 1305.701 | -11.8 |
| <b>VYGGGHLKiKU</b>  | 83 | 397.8807 | 3 | 26.77 | 1190.643 | -18.8 |
| <b>KTHEMWYMWKU</b>  | 83 | 480.2219 | 3 | 29.68 | 1437.669 | -17.3 |
| <b>DVAGDJDVNKU</b>  | 83 | 399.8501 | 3 | 32.32 | 1196.538 | -7.8  |
| <b>LGSPGAZFEKU</b>  | 83 | 367.1843 | 3 | 35.89 | 1098.546 | -13.4 |
| <b>YVGPPPSDNKU</b>  | 83 | 536.7686 | 2 | 36.38 | 1071.535 | -11.5 |
| <b>LYMBCVMGRKU</b>  | 83 | 458.8859 | 3 | 38.76 | 1373.657 | -15.6 |
| <b>LKXSNGEbjKU</b>  | 83 | 474.5638 | 3 | 39.49 | 1420.675 | -3.5  |
| <b>MGGTQYNODKU</b>  | 83 | 608.7572 | 2 | 39.5  | 1215.52  | -16.8 |
| <b>SUPDCNQLYKU</b>  | 83 | 465.5512 | 3 | 42.29 | 1393.644 | -8.9  |
| <b>MFEDKXGMFKU</b>  | 83 | 451.1986 | 3 | 42.3  | 1350.596 | -16.3 |
| <b>PQVPMWGEDKU</b>  | 83 | 395.859  | 3 | 49    | 1184.565 | -8    |
| <b>MYGFMT CSTKU</b> | 83 | 389.8316 | 3 | 50.54 | 1166.492 | -16.5 |
| <b>KVKPRBFMGKU</b>  | 83 | 455.5948 | 3 | 51.54 | 1363.771 | -6.2  |
| <b>PDWSMQFTAKU</b>  | 83 | 403.8556 | 3 | 53.26 | 1208.565 | -16.3 |
| <b>cAYUbVKNQKU</b>  | 83 | 481.2384 | 3 | 54.1  | 1440.716 | -15.5 |
| <b>GYDDiCCCSKU</b>  | 83 | 613.7068 | 2 | 55.23 | 1225.407 | -6.4  |
| <b>GYDiCCCD SKU</b> | 83 | 613.7066 | 2 | 55.31 | 1225.407 | -6.8  |
| <b>MMAMWEJRCKU</b>  | 83 | 465.1995 | 3 | 55.85 | 1392.589 | -9.1  |
| <b>GLBWEYLCKU</b>   | 83 | 481.2405 | 3 | 56.33 | 1440.714 | -9.6  |
| <b>MFiTAGEM MKU</b> | 83 | 639.7773 | 2 | 58.66 | 1277.547 | -5.8  |
| <b>UPHLFAWLKU</b>   | 83 | 426.5627 | 3 | 63.12 | 1276.683 | -12.9 |
| <b>iGDDFVLLIKU</b>  | 83 | 477.5699 | 3 | 73.55 | 1429.696 | -5.8  |
| <b>SUXEEVQLYKU</b>  | 83 | 697.825  | 2 | 73.65 | 1393.649 | -9.6  |
| <b>FBEFFJWVOKU</b>  | 83 | 437.4517 | 4 | 75.96 | 1745.797 | -11.1 |
| <b>XbMSMEXjWKU</b>  | 83 | 559.8909 | 3 | 91.15 | 1676.662 | -6.8  |
| <b>EMEGYQSWiKU</b>  | 83 | 695.7971 | 2 | 91.38 | 1389.589 | -6.6  |
| <b>KPOARAWFLKU</b>  | 82 | 330.6939 | 4 | 28.08 | 1318.752 | -4.3  |
| <b>VECSLRAAYKU</b>  | 82 | 429.566  | 3 | 28.88 | 1285.684 | -6.4  |
| <b>QAPRQACSGKU</b>  | 82 | 596.808  | 2 | 30.01 | 1191.617 | -13.4 |
| <b>STWAKADTRKU</b>  | 82 | 388.209  | 3 | 30.09 | 1161.626 | -17.6 |
| <b>SDDCNPYVV KU</b> | 82 | 569.7559 | 2 | 31.7  | 1137.513 | -13.4 |
| <b>LKQQUVHPGKU</b>  | 82 | 405.2315 | 3 | 33.31 | 1212.684 | -9.2  |

|              |    |          |   |        |          |       |
|--------------|----|----------|---|--------|----------|-------|
| DDHFAECOQKU  | 82 | 432.5153 | 3 | 33.33  | 1294.526 | -1.5  |
| SCTFMSDDKKU  | 82 | 387.5017 | 3 | 35.48  | 1159.5   | -14.5 |
| CQFQCVGNNU   | 82 | 479.2253 | 3 | 35.8   | 1434.677 | -16   |
| VPMGAQFNYKU  | 82 | 385.1988 | 3 | 37.6   | 1152.575 | -0.4  |
| MKVLTAADNFKU | 82 | 389.2113 | 3 | 41.6   | 1164.633 | -17.6 |
| LEMGVTCAGKU  | 82 | 336.5065 | 3 | 44.36  | 1006.494 | 3.8   |
| LiPNGVLLBKU  | 82 | 454.5872 | 3 | 47.1   | 1360.753 | -10.1 |
| PMAGGNEITKU  | 82 | 569.2595 | 2 | 47.4   | 1136.515 | -9.4  |
| TEZFYPEKLU   | 82 | 674.8446 | 2 | 54.48  | 1347.682 | -5.7  |
| YSQMSYAMMKU  | 82 | 619.7672 | 2 | 57.47  | 1237.529 | -7.6  |
| CcPLMYVOEKU  | 82 | 382.6823 | 4 | 58.17  | 1526.723 | -15.2 |
| YYVNQUDOAKU  | 82 | 461.8786 | 3 | 58.61  | 1382.623 | -6.3  |
| YYVGGMLbXKU  | 82 | 456.5466 | 3 | 59.41  | 1366.642 | -17.5 |
| LAVLIMYIAKU  | 82 | 497.2543 | 3 | 63.4   | 1488.75  | -6.2  |
| QESFOSGEVKU  | 82 | 405.1929 | 3 | 71.5   | 1212.564 | -5.4  |
| UPFLFSKNQKU  | 82 | 644.3451 | 2 | 87.79  | 1286.688 | -9.8  |
| VPLLVDZOBKU  | 82 | 486.2563 | 3 | 92.78  | 1455.754 | -4.5  |
| DWPLLCPIXKU  | 82 | 741.3439 | 2 | 106.67 | 1480.689 | -10.2 |
| VSEAQjDMAKU  | 81 | 593.7718 | 2 | 24.02  | 1185.542 | -10.7 |
| SGMDTTCOVKU  | 81 | 431.5303 | 3 | 25.38  | 1291.579 | -7.8  |
| RCKYcYNDKU   | 81 | 384.1783 | 4 | 25.74  | 1532.698 | -8.6  |
| KVTSTIZDKU   | 81 | 437.2039 | 3 | 26.53  | 1308.6   | -7.7  |
| TGQGGGWYIKU  | 81 | 396.1846 | 3 | 28.09  | 1185.544 | -9.6  |
| EMDKSQAPDKU  | 81 | 383.1788 | 3 | 30.29  | 1146.534 | -17   |
| XDGVLVKVGKU  | 81 | 388.5445 | 3 | 35.9   | 1162.621 | -7.6  |
| LAAKQWWOWKU  | 81 | 473.9196 | 3 | 37.11  | 1418.747 | -7.2  |
| PPEODCSSGKU  | 81 | 561.7318 | 2 | 38.39  | 1121.467 | -16.1 |
| VTCLTDNIVKU  | 81 | 409.2038 | 3 | 41.51  | 1224.604 | -11.8 |
| KVIEMQLQVKU  | 81 | 464.9149 | 3 | 44.18  | 1391.745 | -15.6 |
| NMFLMKXVVKU  | 81 | 443.5692 | 3 | 46.34  | 1327.7   | -11.1 |
| CMLSZFDNVKU  | 81 | 417.5236 | 3 | 46.38  | 1249.558 | -7.6  |
| PTYAETMSKU   | 81 | 564.2657 | 2 | 48.44  | 1126.533 | -14.2 |
| MAMWEjTSAKU  | 81 | 631.7783 | 2 | 48.83  | 1261.555 | -10.7 |
| PARPMEGWDKU  | 81 | 395.859  | 3 | 49     | 1184.576 | -17.5 |
| MYAQPMGQFKU  | 81 | 600.2808 | 2 | 49.34  | 1198.563 | -13.2 |
| AGQOGYjLcKU  | 81 | 671.8226 | 2 | 52.28  | 1341.638 | -5.3  |
| LbjPMMYYQKU  | 81 | 519.5757 | 3 | 60.82  | 1555.709 | -2.3  |
| FFAGYLAXGKU  | 81 | 596.795  | 2 | 68.5   | 1191.594 | -15.3 |
| MMFLKYACKU   | 81 | 432.8793 | 3 | 69.05  | 1295.623 | -5.3  |
| NYETTYDMVKU  | 81 | 631.778  | 2 | 71.38  | 1261.565 | -18.7 |
| EGMEMSLOGKU  | 81 | 592.7656 | 2 | 78.17  | 1183.523 | -5.1  |
| KWWMSCPWWKU  | 81 | 479.5633 | 3 | 81.69  | 1435.668 | -0.1  |
| IRQQMGFVDKU  | 81 | 699.8371 | 2 | 84.59  | 1397.673 | -9.3  |
| PTHEFMiLPKU  | 80 | 333.9173 | 4 | 23.94  | 1331.656 | -12   |
| jkVMDGYQGKU  | 80 | 411.868  | 3 | 24.12  | 1232.594 | -9.8  |

|             |    |          |   |       |          |       |
|-------------|----|----------|---|-------|----------|-------|
| KQEKIVEAGKU | 80 | 436.2352 | 3 | 24.57 | 1305.689 | -4.1  |
| FGQQLQEMMKU | 80 | 413.5316 | 3 | 27.29 | 1237.595 | -17.5 |
| DMSOAGAFIKU | 80 | 440.8618 | 3 | 27.38 | 1319.568 | -3.4  |
| XNGUPLMTHKU | 80 | 432.871  | 3 | 28.59 | 1295.605 | -10.9 |
| VGANAYECYKU | 80 | 558.7505 | 2 | 30.42 | 1115.507 | -18.2 |
| VLCFAAFSYKU | 80 | 324.6733 | 4 | 31.65 | 1294.678 | -10.3 |
| DQYYDAHWWKU | 80 | 451.5483 | 3 | 32.33 | 1351.631 | -5.8  |
| KMESAKejOKU | 80 | 341.4206 | 4 | 32.49 | 1361.659 | -4.3  |
| QOASDRRFCKU | 80 | 423.219  | 3 | 32.49 | 1266.644 | -7    |
| VDOYCFNSMKU | 80 | 365.1611 | 4 | 33.42 | 1456.637 | -15   |
| KALNPMMNLKU | 80 | 290.415  | 4 | 34.2  | 1157.641 | -9.1  |
| GTQDASKGKKU | 80 | 340.19   | 3 | 36.58 | 1017.557 | -8.4  |
| RWILPGSVMKU | 80 | 455.2401 | 3 | 38.45 | 1362.708 | -7.1  |
| GGMPNVLVKU  | 80 | 342.8689 | 3 | 39.79 | 1025.606 | -20   |
| ESCTWYTKXKU | 80 | 455.5405 | 3 | 42.49 | 1363.609 | -7    |
| YASYMMASEKU | 80 | 590.2526 | 2 | 46.58 | 1178.51  | -16.5 |
| PAGVDEZJKU  | 80 | 411.8525 | 3 | 49.05 | 1232.539 | -3    |
| LNWPMDZVAKU | 80 | 423.2083 | 3 | 52.36 | 1266.618 | -11.8 |
| MVAFMERTLKU | 80 | 408.8887 | 3 | 52.67 | 1223.652 | -6.1  |
| DQYYWHNKKKU | 80 | 470.2354 | 3 | 52.78 | 1407.705 | -14.6 |
| VcEQDSUVYKU | 80 | 670.8118 | 2 | 54.74 | 1339.624 | -10.9 |
| VcETDYMVYKU | 80 | 670.8118 | 2 | 54.74 | 1339.62  | -8.1  |
| PXYGAADYAKU | 80 | 587.7712 | 2 | 56.47 | 1173.532 | -3.1  |
| EDQGEJVFQKU | 80 | 672.8    | 2 | 61.72 | 1343.606 | -15.4 |
| XADDFVLLQKU | 80 | 423.216  | 3 | 65.07 | 1266.647 | -16.2 |
| bMGMEHQjbKU | 80 | 502.2166 | 3 | 65.16 | 1503.635 | -4.8  |
| ACGVQWIDLKU | 80 | 437.2103 | 3 | 66.93 | 1308.614 | -3.7  |
| VCYVMZbedKU | 80 | 699.8027 | 2 | 71    | 1397.592 | -1    |
| NWYZDGGGFKU | 80 | 413.1811 | 3 | 71.84 | 1236.531 | -8    |
| PYRYFQNSSKU | 79 | 322.9151 | 4 | 24.33 | 1287.636 | -3.7  |
| LEHALLRAHKU | 79 | 297.4313 | 4 | 24.39 | 1185.71  | -11.2 |
| EGbTFAVNKKU | 79 | 404.2153 | 3 | 25.74 | 1209.632 | -6.6  |
| UFCDHAFVGKU | 79 | 401.5199 | 3 | 28.31 | 1201.545 | -6.2  |
| KEXVNYDYEKU | 79 | 469.5514 | 3 | 28.33 | 1405.638 | -3.7  |
| GAPELLJEKU  | 79 | 398.2061 | 3 | 30.18 | 1191.62  | -19.9 |
| PIcPFNSYTKU | 79 | 479.8911 | 3 | 34.54 | 1436.666 | -9.8  |
| MGMjEAbKMKU | 79 | 451.2035 | 3 | 34.69 | 1350.603 | -10.8 |
| XFxiVRTGDKU | 79 | 499.2296 | 3 | 35.3  | 1494.684 | -11.6 |
| MGLOcNSADKU | 79 | 411.5202 | 3 | 37.39 | 1231.56  | -16.8 |
| NMPGGVLLVKU | 79 | 342.869  | 3 | 39.69 | 1025.606 | -19.6 |
| PTFEFWFLKU  | 79 | 448.2239 | 3 | 48.07 | 1341.676 | -19.2 |
| PAMjFVDADKU | 79 | 401.1906 | 3 | 49.24 | 1200.557 | -5.6  |
| TLPKFNKTGKU | 79 | 378.2296 | 3 | 49.27 | 1131.676 | -8.1  |
| LLKVAGYXbKU | 79 | 443.5789 | 3 | 50.3  | 1327.733 | -13.7 |
| QKEFBeweQKU | 79 | 382.1794 | 4 | 50.55 | 1524.716 | -18.4 |

|             |    |          |   |       |          |       |
|-------------|----|----------|---|-------|----------|-------|
| LWUQQEQGKKU | 79 | 441.8997 | 3 | 51.09 | 1322.684 | -5.2  |
| ZDDNABFMGKU | 79 | 456.1907 | 3 | 51.61 | 1365.557 | -5.3  |
| EGMYQRcYYKU | 79 | 477.5591 | 3 | 52.4  | 1429.653 | 1.8   |
| ciFCVELAGKU | 79 | 481.2392 | 3 | 53.88 | 1440.705 | -6.4  |
| EKYFCMFNMKU | 79 | 447.2    | 3 | 54.11 | 1338.592 | -10.6 |
| SMHQUDFTYKU | 79 | 445.8638 | 3 | 54.43 | 1334.583 | -9.7  |
| VcPCGCMVYKU | 79 | 670.812  | 2 | 55.01 | 1339.62  | -7.9  |
| FKDTYKSSVKU | 79 | 401.2174 | 3 | 58.4  | 1200.65  | -16.4 |
| SMEMSLSSSKU | 79 | 543.2441 | 2 | 59.99 | 1084.489 | -14.4 |
| WCTLNAYGEKU | 79 | 592.2823 | 2 | 65.24 | 1182.549 | 0.9   |
| TVSWIZjVVKU | 79 | 504.9136 | 3 | 68.4  | 1511.734 | -10.1 |
| ADASFXQEVKU | 79 | 607.2866 | 2 | 71.58 | 1212.564 | -4    |
| YFKYACsbWKU | 79 | 706.8279 | 2 | 72.82 | 1411.656 | -10.6 |
| bCFLSVMOGKU | 79 | 435.8759 | 3 | 73.78 | 1304.609 | -2    |
| DSVFLYZMTKU | 79 | 649.3088 | 2 | 77.61 | 1296.617 | -10.8 |
| TZFLSVYDNKU | 79 | 640.8077 | 2 | 81.22 | 1279.62  | -14.7 |
| ZYPVGENOJKU | 78 | 471.8781 | 3 | 26.54 | 1412.63  | -12.7 |
| KYbCSQQJYKU | 78 | 510.8956 | 3 | 26.96 | 1529.686 | -13.6 |
| TDOQQFELYKU | 78 | 458.884  | 3 | 27.86 | 1373.648 | -12.5 |
| TCKUQLMPSKU | 78 | 454.9005 | 3 | 29.09 | 1361.694 | -10.3 |
| LETJFLDTNKU | 78 | 449.2235 | 3 | 30.97 | 1344.663 | -10.5 |
| PNLBMSGGTKU | 78 | 393.5258 | 3 | 31.49 | 1177.572 | -13.5 |
| YKYEGTiWHKU | 78 | 361.9221 | 4 | 33.43 | 1443.68  | -14.6 |
| ZTVVHXWODKU | 78 | 501.5598 | 3 | 33.43 | 1501.682 | -16.5 |
| YNCMVALBRKU | 78 | 457.8925 | 3 | 33.66 | 1370.675 | -14.3 |
| KLNAPMMNLKU | 78 | 290.415  | 4 | 34.09 | 1157.641 | -9.1  |
| STLDSPHMEKU | 78 | 572.2679 | 2 | 35.11 | 1142.539 | -15.5 |
| KGbcLCFAGKU | 78 | 346.4296 | 4 | 35.19 | 1381.71  | -15.1 |
| PPERCCDSGKU | 78 | 545.7374 | 2 | 38.42 | 1089.47  | -8.5  |
| PDLGGANUQKU | 78 | 539.77   | 2 | 38.82 | 1077.532 | -5.6  |
| KjNWRGbjMKU | 78 | 389.4374 | 4 | 39.69 | 1553.743 | -14.5 |
| CGTTQYNODKU | 78 | 616.7542 | 2 | 39.8  | 1231.515 | -17.4 |
| ASCTQYNODKU | 78 | 616.7538 | 2 | 39.91 | 1231.515 | -17.9 |
| KQObFGYNQKU | 78 | 478.5664 | 3 | 41.96 | 1432.693 | -10.8 |
| PAEDRWGEDKU | 78 | 401.1896 | 3 | 43.22 | 1200.552 | -4.4  |
| EGGEXNMSGKU | 78 | 564.2346 | 2 | 43.99 | 1126.457 | -2.3  |
| LNFBEQLQVKU | 78 | 348.9379 | 4 | 44.29 | 1391.736 | -9.9  |
| CVQMCAFFDKU | 78 | 669.7983 | 2 | 46.57 | 1337.596 | -10.5 |
| OXRPDDjDQKU | 78 | 502.5481 | 3 | 47.39 | 1504.639 | -10.7 |
| GASEMICVFKU | 78 | 470.5439 | 3 | 48.16 | 1408.636 | -18.6 |
| UNVLSRTIDKU | 78 | 468.2346 | 3 | 48.56 | 1401.697 | -10.4 |
| jMMSGZSDLKU | 78 | 424.5169 | 3 | 49.97 | 1270.541 | -9.2  |
| EGMYQYRcYKU | 78 | 477.5594 | 3 | 52.3  | 1429.653 | 2.4   |
| KAGESCiLGKU | 78 | 563.2762 | 2 | 52.91 | 1124.552 | -12.2 |
| EjCPSLWOCKU | 78 | 459.8679 | 3 | 53.18 | 1376.584 | -1.4  |

|              |    |          |   |        |          |       |
|--------------|----|----------|---|--------|----------|-------|
| KYYDDCMVYKU  | 78 | 492.2207 | 3 | 54.82  | 1473.666 | -17.6 |
| YNHLFSKNQKU  | 78 | 426.5627 | 3 | 63.12  | 1276.668 | -1    |
| EGRMXiLLYKU  | 78 | 488.2408 | 3 | 63.83  | 1461.717 | -11   |
| OGMYFcQCfKU  | 78 | 784.8489 | 2 | 66.93  | 1567.692 | -5.8  |
| OQADGELNMKU  | 78 | 604.7818 | 2 | 68.11  | 1207.552 | -2    |
| NNNFADESKKU  | 78 | 583.2761 | 2 | 69.46  | 1164.552 | -12.5 |
| WGUPCGFGQKU  | 78 | 579.7596 | 2 | 74.54  | 1157.519 | -12.3 |
| NDGTRVMMVKU  | 78 | 575.2874 | 2 | 75.08  | 1148.579 | -16.6 |
| AYNDASDLMKU  | 78 | 563.7549 | 2 | 75.16  | 1125.513 | -15.2 |
| iCSCTAYQVKU  | 78 | 618.2656 | 2 | 87.72  | 1234.534 | -14.3 |
| VPLLvNEbKU   | 78 | 661.8631 | 2 | 92.96  | 1321.729 | -13.1 |
| ODSGSYXAGKU  | 78 | 604.2567 | 2 | 101.14 | 1206.503 | -3.2  |
| MCYRGJDRDKU  | 77 | 389.9282 | 4 | 25.48  | 1555.697 | -8.6  |
| GjQPKCVGNKU  | 77 | 569.7855 | 2 | 30.28  | 1137.568 | -10.4 |
| DPSXNYSEVKU  | 77 | 419.8554 | 3 | 33.07  | 1256.553 | -7    |
| STLDSHMPEKU  | 77 | 572.2678 | 2 | 34.95  | 1142.539 | -15.7 |
| STLDSUGQEKU  | 77 | 572.2681 | 2 | 35.02  | 1142.532 | -8.7  |
| MYEDCYRNFKU  | 77 | 456.5294 | 3 | 35.97  | 1366.58  | -9.7  |
| LNYPMPDWHDKU | 77 | 439.8701 | 3 | 37.97  | 1316.597 | -6.5  |
| FAPZJAGHZKU  | 77 | 461.5453 | 3 | 38.86  | 1381.623 | -6.8  |
| MPVSUGDPJKU  | 77 | 638.2935 | 2 | 39.16  | 1274.578 | -4.5  |
| PWZCSPKENKU  | 77 | 428.2019 | 3 | 42.87  | 1281.593 | -6.7  |
| NMFLMKLbSKU  | 77 | 443.5696 | 3 | 46.46  | 1327.696 | -6.7  |
| iFPMSYAMMKU  | 77 | 446.867  | 3 | 46.57  | 1337.584 | -3.3  |
| TNECOMCVFKU  | 77 | 475.8752 | 3 | 48.21  | 1424.614 | -7.3  |
| EDAGADJFQKU  | 77 | 623.2685 | 2 | 50.06  | 1244.538 | -12.4 |
| jMMSGYAFEKU  | 77 | 636.2743 | 2 | 50.1   | 1270.544 | -8.2  |
| FMVVBPiWOKU  | 77 | 419.699  | 4 | 50.67  | 1674.79  | -13.6 |
| OEGMYWAQWKU  | 77 | 467.8789 | 3 | 52.13  | 1400.62  | -3.4  |
| EjPCSLWCOKU  | 77 | 459.8667 | 3 | 53.27  | 1376.584 | -3.9  |
| HHLSZFDVNKU  | 77 | 430.8796 | 3 | 55.43  | 1289.627 | -7.3  |
| YDAYTQEMMKU  | 77 | 639.7772 | 2 | 58.76  | 1277.542 | -1.6  |
| VPLLWATCKU   | 77 | 376.8858 | 3 | 61.42  | 1127.653 | -15   |
| CILTSTCPTKU  | 77 | 696.3297 | 2 | 64.59  | 1390.647 | -1.3  |
| AYECAcAFQKU  | 77 | 612.2767 | 2 | 66.97  | 1222.552 | -10.7 |
| MRADPESXJKU  | 77 | 473.5457 | 3 | 69.84  | 1417.623 | -5    |
| GGADYXOGFKU  | 77 | 413.1811 | 3 | 71.77  | 1236.528 | -5.5  |
| KCUPYSKLEKU  | 77 | 425.5551 | 3 | 75.06  | 1273.66  | -13.1 |
| ZSLGADEXcKU  | 77 | 664.2933 | 2 | 83.4   | 1326.578 | -4.6  |
| AUAYGEMMDKU  | 77 | 597.7453 | 2 | 88.62  | 1193.496 | -16.6 |
| ZSLGADEiUKU  | 77 | 664.2943 | 2 | 95.32  | 1326.582 | -6.1  |
| QNHALLKVHKU  | 76 | 297.4313 | 4 | 24.39  | 1185.71  | -11.2 |
| LNSPADCDLKU  | 76 | 537.7581 | 2 | 24.6   | 1073.518 | -14.8 |
| PSGSZGMAGKU  | 76 | 493.2245 | 2 | 25.33  | 984.4447 | -10.4 |
| QTMAGGQcUKU  | 76 | 597.2722 | 2 | 27.53  | 1192.549 | -15.8 |

|              |    |          |   |       |          |       |
|--------------|----|----------|---|-------|----------|-------|
| KPFQRAWFLKU  | 76 | 330.6942 | 4 | 27.99 | 1318.766 | -14   |
| KbKCRQYEFKU  | 76 | 362.4371 | 4 | 28.95 | 1445.742 | -15.6 |
| PNLAOQMGTKU  | 76 | 388.1942 | 3 | 31.43 | 1161.583 | -18.8 |
| TYVLEHMDQKU  | 76 | 421.5389 | 3 | 32.06 | 1261.613 | -14.1 |
| KGMRRDSIGKU  | 76 | 423.2188 | 3 | 32.38 | 1266.648 | -10.9 |
| NYGDPQQHNKU  | 76 | 600.2761 | 2 | 38.11 | 1198.548 | -8.5  |
| YjKCQjYDMKU  | 76 | 748.3107 | 2 | 39.11 | 1494.633 | -17.2 |
| MNTGAYNODKU  | 76 | 608.7574 | 2 | 39.65 | 1215.52  | -16.5 |
| DGQCPTWFGKU  | 76 | 429.1972 | 3 | 39.98 | 1284.595 | -19.9 |
| DGQcGPTWOKU  | 76 | 429.1983 | 3 | 40.09 | 1284.583 | -7.5  |
| PWZCSLQWGKU  | 76 | 433.5337 | 3 | 42.72 | 1297.603 | -18   |
| CUCMTWYTCKU  | 76 | 704.7883 | 2 | 44.46 | 1407.56  | 1.3   |
| PLYDWHCSPKU  | 76 | 415.5272 | 3 | 44.88 | 1243.581 | -16.9 |
| LYCDKMFINKU  | 76 | 771.8685 | 2 | 45.05 | 1541.727 | -2.9  |
| KIKNCVAPVKU  | 76 | 319.9301 | 4 | 45.09 | 1275.697 | -4.7  |
| CVAGMSiFDKU  | 76 | 669.7983 | 2 | 46.57 | 1337.601 | -13.8 |
| QbWMMPjDQKU  | 76 | 497.217  | 3 | 47.42 | 1488.643 | -9.1  |
| HQDGCUFNFKU  | 76 | 637.7719 | 2 | 48.9  | 1273.541 | -9.2  |
| MMAEANCKEKKU | 76 | 434.5371 | 3 | 49.5  | 1300.597 | -5.8  |
| LNJWQEWQKU   | 76 | 509.2381 | 3 | 50.76 | 1524.707 | -9.2  |
| MMAMWEIYAKU  | 76 | 465.1995 | 3 | 55.85 | 1392.59  | -9.2  |
| YLGAFPDSSKU  | 76 | 542.2711 | 2 | 59.03 | 1082.54  | -11.1 |
| PEDbGINFMKU  | 76 | 482.5361 | 3 | 59.64 | 1444.611 | -17.2 |
| EDQADJVOAKU  | 76 | 672.8    | 2 | 61.67 | 1343.592 | -5.1  |
| SPLVLNAGEKU  | 76 | 513.7935 | 2 | 64.28 | 1025.587 | -14.1 |
| BMMMVLLGAKU  | 76 | 634.3214 | 2 | 65.09 | 1266.645 | -13.4 |
| MDEMSLSSSKU  | 76 | 557.2407 | 2 | 66.33 | 1112.484 | -15.5 |
| RVEONGGLFKU  | 76 | 611.8251 | 2 | 68.09 | 1221.648 | -10.1 |
| MMFLKMZSSKU  | 76 | 648.8163 | 2 | 69.15 | 1295.619 | -0.6  |
| NWYTCYGGFKU  | 76 | 413.1811 | 3 | 71.85 | 1236.539 | -13.9 |
| XSDDFVLLIKU  | 76 | 482.9008 | 3 | 73.81 | 1445.69  | -6.7  |
| MOPWLFEXDKU  | 76 | 496.8865 | 3 | 75.52 | 1487.663 | -17   |
| ZMMEMSLOGKU  | 76 | 662.7872 | 2 | 75.97 | 1323.564 | -2.7  |
| YcLDJEGGXKU  | 76 | 730.8116 | 2 | 79.52 | 1459.627 | -12.1 |
| NKHPSLKVHUKU | 75 | 297.4313 | 4 | 24.53 | 1185.71  | -11.4 |
| QTMANQWGMKU  | 75 | 597.2737 | 2 | 27.84 | 1192.548 | -12.7 |
| QPRANLLcQKU  | 75 | 315.9331 | 4 | 28.19 | 1259.718 | -11.6 |
| FYASMXNATKU  | 75 | 417.8536 | 3 | 29.11 | 1250.561 | -17.7 |
| HSKVCKJMVKU  | 75 | 491.5926 | 3 | 31.02 | 1471.774 | -12.2 |
| CEWFHCYNDKU  | 75 | 497.8743 | 3 | 31.87 | 1490.61  | -6.1  |
| MTLAERFAHKU  | 75 | 401.549  | 3 | 32.07 | 1201.639 | -11.6 |
| KSMLDNFELKU  | 75 | 408.5478 | 3 | 32.76 | 1222.638 | -13.4 |
| DPTVPSPMGKU  | 75 | 514.2587 | 2 | 33.67 | 1026.517 | -13.7 |
| AXPVOYMADKU  | 75 | 439.8676 | 3 | 36.37 | 1316.595 | -10.4 |
| VGYPDNIIVKU  | 75 | 409.2041 | 3 | 41.61 | 1224.601 | -8.3  |



|              |    |          |   |        |          |       |
|--------------|----|----------|---|--------|----------|-------|
| LTVGUBXNQKU  | 75 | 478.566  | 3 | 41.82  | 1432.687 | -7.7  |
| VQNAUGCAMKU  | 75 | 550.7548 | 2 | 42.14  | 1099.502 | -5.8  |
| FLFDCSYEOKU  | 75 | 452.1985 | 3 | 46.72  | 1353.592 | -13.8 |
| LNSAALEZNU   | 75 | 385.1995 | 3 | 47.01  | 1152.589 | -10.3 |
| WSYTHGiTKKU  | 75 | 447.5536 | 3 | 49.77  | 1339.654 | -11.3 |
| NEMQNFQTAU   | 75 | 403.8564 | 3 | 53.38  | 1208.561 | -11.1 |
| JScEGELPDKU  | 75 | 667.2971 | 2 | 53.54  | 1332.598 | -13.9 |
| YLTGPFSDGKU  | 75 | 542.2712 | 2 | 58.94  | 1082.54  | -10.8 |
| QWcWOQDFVKU  | 75 | 511.9091 | 3 | 62.53  | 1532.714 | -5.5  |
| MYGFMTTWAKU  | 75 | 412.1912 | 3 | 63.29  | 1233.567 | -12.7 |
| ZCMPYELKIKU  | 75 | 748.8423 | 2 | 63.96  | 1495.68  | -7    |
| GQKYNjOMFKU  | 75 | 476.5541 | 3 | 64.88  | 1426.665 | -16.9 |
| ijDATECETKU  | 75 | 669.7741 | 2 | 64.99  | 1337.54  | -4.4  |
| EEDOSGkbWVKU | 75 | 467.2103 | 3 | 65.5   | 1398.625 | -11   |
| KUOCCSQYYKU  | 75 | 469.1957 | 3 | 67.6   | 1404.593 | -19.5 |
| jTKYASCbWVKU | 75 | 706.8268 | 2 | 73     | 1411.649 | -7.4  |
| MWLSGbMMLKU  | 75 | 438.5442 | 3 | 74.3   | 1312.631 | -15.6 |
| ZCLPYSKLEKU  | 75 | 425.5552 | 3 | 74.88  | 1273.649 | -4    |
| YbPQSTFVDKU  | 75 | 651.3109 | 2 | 77.28  | 1300.627 | -14.9 |
| MAGELGYQDKU  | 75 | 555.7639 | 2 | 77.49  | 1109.518 | -3.9  |
| MAEGLGYNEKU  | 75 | 555.7655 | 2 | 77.69  | 1109.518 | -1    |
| XTLKOHAiYKU  | 75 | 506.5831 | 3 | 88.93  | 1516.742 | -9.3  |
| SKCDSVMFNKU  | 75 | 435.8761 | 3 | 91     | 1304.625 | -13.9 |
| DOSGSYGIGKU  | 75 | 604.2564 | 2 | 101.09 | 1206.503 | -4.1  |
| VSEAQjCDVKU  | 74 | 593.7697 | 2 | 24.17  | 1185.542 | -14.3 |
| KVTCTSiZDKU  | 74 | 437.2044 | 3 | 26.3   | 1308.6   | -6.5  |
| TITFAGPGVKU  | 74 | 584.2991 | 2 | 26.93  | 1166.594 | -8.4  |
| SSAAPPCQVKU  | 74 | 493.7525 | 2 | 27.27  | 985.5015 | -11.2 |
| TDZDQVNAAKU  | 74 | 385.8475 | 3 | 27.5   | 1154.532 | -9.3  |
| MSVVANANZKU  | 74 | 564.28   | 2 | 30.53  | 1126.555 | -8.8  |
| KGRZXLDTNKU  | 74 | 449.2242 | 3 | 31.19  | 1344.676 | -18.6 |
| KNKbFDTGGKU  | 74 | 404.5463 | 3 | 31.2   | 1210.627 | -8.5  |
| VEKSCAFWAKU  | 74 | 584.295  | 2 | 33.31  | 1166.591 | -13   |
| YTNCZHQWEKU  | 74 | 468.198  | 3 | 33.94  | 1401.588 | -11.5 |
| MLVENGPVGKU  | 74 | 348.1889 | 3 | 34.19  | 1041.564 | -18.3 |
| DDHFMSSWQKU  | 74 | 427.1833 | 3 | 34.65  | 1278.545 | -13.3 |
| KGDCCLCCKU   | 74 | 469.2015 | 3 | 34.82  | 1404.606 | -16.6 |
| DASbLKVGEKU  | 74 | 388.5443 | 3 | 35.63  | 1162.616 | -4.5  |
| jTHVAEAJYKU  | 74 | 348.918  | 4 | 36.41  | 1391.651 | -5.8  |
| DDPVVEKMPKU  | 74 | 386.2041 | 3 | 36.68  | 1155.596 | -4.6  |
| CVLUDGSYAKU  | 74 | 641.8123 | 2 | 37.06  | 1281.617 | -5.2  |
| LKXSNWSMJKU  | 74 | 474.5637 | 3 | 39.4   | 1420.675 | -4.2  |
| DMOVVAGFTKU  | 74 | 390.8663 | 3 | 41.25  | 1169.576 | 0.6   |
| HKACiJSSHKU  | 74 | 466.2148 | 3 | 44.55  | 1395.629 | -4.6  |
| FQLRDQFPVKU  | 74 | 426.2386 | 3 | 44.95  | 1275.709 | -11.7 |

|             |    |          |   |       |          |       |
|-------------|----|----------|---|-------|----------|-------|
| PWJSPKGEGKU | 74 | 417.5389 | 3 | 45.44 | 1249.616 | -16.9 |
| YEUQWDMLSKU | 74 | 460.209  | 3 | 46.25 | 1377.614 | -6    |
| TNEMIGcVFKU | 74 | 470.5446 | 3 | 47.88 | 1408.638 | -18.4 |
| LNMFVRTGDKU | 74 | 393.8748 | 3 | 48.33 | 1178.623 | -17.3 |
| FQFVLOAPVKU | 74 | 417.9017 | 3 | 48.34 | 1250.704 | -16.3 |
| jMMSGYEAFKU | 74 | 424.5179 | 3 | 50.07 | 1270.544 | -9.9  |
| VGAMCFAFDKU | 74 | 544.2488 | 2 | 50.6  | 1086.499 | -14.6 |
| PMAMWEcHHKU | 74 | 453.8703 | 3 | 51.71 | 1358.609 | -14.8 |
| YSADTKMPMKU | 74 | 390.8578 | 3 | 52.63 | 1169.557 | -4.8  |
| MKSYKHSYFKU | 74 | 439.8894 | 3 | 62.89 | 1316.67  | -17.9 |
| ijDATMDSPKU | 74 | 653.7788 | 2 | 65.08 | 1305.55  | -5    |
| bMGMEHFHHKU | 74 | 685.8054 | 2 | 65.21 | 1369.599 | -1.9  |
| ONDUGGFTYKU | 74 | 642.7814 | 2 | 67.02 | 1283.554 | -4.8  |
| SSGVQQANXKU | 74 | 569.2714 | 2 | 68    | 1136.544 | -13.4 |
| PCDFciLPVKU | 74 | 498.5862 | 3 | 73.22 | 1492.736 | 0.5   |
| ZKEESVMFNKU | 74 | 435.8759 | 3 | 74.94 | 1304.618 | -9.6  |
| NDGTRQKCTKU | 74 | 575.2874 | 2 | 75.08 | 1148.572 | -10.2 |
| DMCSAKEJFKU | 74 | 491.2183 | 3 | 75.73 | 1470.658 | -17   |
| NEGODDHiQKU | 74 | 460.5233 | 3 | 76.98 | 1378.563 | -10.8 |
| jDELWLDEGKU | 74 | 656.8012 | 2 | 86.59 | 1311.606 | -14.2 |
| UPFLQHPLEKU | 74 | 644.3453 | 2 | 87.73 | 1286.688 | -9.4  |
| KILIHAFSYKU | 74 | 506.5826 | 3 | 89.03 | 1516.755 | -18.9 |
| FMADALGWXKU | 74 | 629.2974 | 2 | 90.76 | 1256.587 | -5.6  |
| VQCLLVcWBKU | 74 | 486.2563 | 3 | 92.7  | 1455.758 | -7.3  |
| PTHEFMHcLKU | 73 | 333.9179 | 4 | 24.23 | 1331.652 | -7.3  |
| KIHEENAKSKU | 73 | 454.226  | 3 | 25.36 | 1359.675 | -13.6 |
| ELLTFCDMTKU | 73 | 400.5243 | 3 | 25.41 | 1198.573 | -18   |
| ENSDPGCHLKU | 73 | 549.747  | 2 | 25.63 | 1097.492 | -11.8 |
| LYMKYcJNDKU | 73 | 384.1786 | 4 | 25.88 | 1532.712 | -17.2 |
| KYBCTGQJYKU | 73 | 383.4232 | 4 | 26.93 | 1529.684 | -13.4 |
| GVLPEENiWKU | 73 | 435.5531 | 3 | 29.82 | 1303.643 | -4.2  |
| EMDELTPGEKU | 73 | 574.2639 | 2 | 30.4  | 1146.523 | -8.3  |
| TNFOYCANJKU | 73 | 458.1994 | 3 | 32.39 | 1371.586 | -7.1  |
| DDHFWTCTQKU | 73 | 427.1839 | 3 | 33.16 | 1278.545 | -11.9 |
| LNGMSiDYEKU | 73 | 645.2869 | 2 | 36.36 | 1288.563 | -2.5  |
| NATGESKGKKU | 73 | 340.1901 | 3 | 36.69 | 1017.557 | -8.1  |
| MXFMTSSCAKU | 73 | 408.8392 | 3 | 37.85 | 1223.5   | -3.2  |
| KADBLEVGLKU | 73 | 416.2349 | 3 | 37.87 | 1245.688 | -4.4  |
| MYOMTASCSKU | 73 | 408.8387 | 3 | 38.04 | 1223.5   | -4.4  |
| GEFRTHQWMKU | 73 | 440.2175 | 3 | 39.3  | 1317.64  | -7.2  |
| MNTQUTPCDKU | 73 | 608.7569 | 2 | 39.74 | 1215.513 | -10.9 |
| MKVLTDGQFKU | 73 | 389.2113 | 3 | 41.6  | 1164.633 | -17.6 |
| CVYCYZNZKKU | 73 | 519.9015 | 3 | 49.1  | 1556.69  | -4.4  |
| ZOQLEQTCFKU | 73 | 465.5481 | 3 | 51.12 | 1393.631 | -6    |
| XDDFMPGGSKU | 73 | 586.7481 | 2 | 55.17 | 1171.483 | -1.1  |

|                     |    |          |   |        |          |       |
|---------------------|----|----------|---|--------|----------|-------|
| <b>NYPMNNBWKKU</b>  | 73 | 490.2327 | 3 | 55.53  | 1467.688 | -8.2  |
| <b>DbMDAEjKMKU</b>  | 73 | 465.1997 | 3 | 55.73  | 1392.595 | -12.9 |
| <b>SYGAMSIFDKU</b>  | 73 | 619.7672 | 2 | 57.47  | 1237.531 | -8.6  |
| <b>DQDOUDTAQKU</b>  | 73 | 435.192  | 3 | 58.27  | 1302.545 | 7     |
| <b>PXYAGDAYJKU</b>  | 73 | 685.3001 | 2 | 59.87  | 1368.592 | -4.3  |
| <b>PXYQADYZAKU</b>  | 73 | 685.3001 | 2 | 59.88  | 1368.596 | -7.5  |
| <b>AYQJCAFGAKU</b>  | 73 | 612.2767 | 2 | 66.88  | 1222.551 | -9.7  |
| <b>LZFDQEEIVKU</b>  | 73 | 498.2304 | 3 | 71.78  | 1491.685 | -10.1 |
| <b>WTbZNGWOFKU</b>  | 73 | 518.9019 | 3 | 72.49  | 1553.688 | -2.7  |
| <b>FQQJTfEYKU</b>   | 73 | 541.2451 | 3 | 74.43  | 1620.723 | -6.1  |
| <b>jSFLSVMOGKU</b>  | 73 | 640.8087 | 2 | 81.31  | 1279.621 | -14.4 |
| <b>LAVDVZZMGKU</b>  | 73 | 611.3015 | 2 | 84.37  | 1220.597 | -7.1  |
| <b>YTSPNAWHJKU</b>  | 73 | 656.3096 | 2 | 84.52  | 1310.613 | -6.1  |
| <b>EZELPiDDSKU</b>  | 73 | 680.7932 | 2 | 86.11  | 1359.581 | -6.7  |
| <b>ZDYVLETjIKU</b>  | 73 | 752.8436 | 2 | 102.66 | 1503.683 | -6.9  |
| <b>TCbFQSTBTKU</b>  | 73 | 704.3112 | 2 | 118.97 | 1406.627 | -13.6 |
| <b>KHKYDGVBLKU</b>  | 72 | 341.1898 | 4 | 23.12  | 1360.742 | -8.6  |
| <b>KLKVACbGJKU</b>  | 72 | 424.9002 | 3 | 23.95  | 1271.696 | -13.3 |
| <b>CVGAVWNVEKU</b>  | 72 | 417.8849 | 3 | 27.46  | 1250.647 | -11.5 |
| <b>RjCCPLMTHKU</b>  | 72 | 432.8709 | 3 | 28.74  | 1295.602 | -8.6  |
| <b>GVSDVFRDMKU</b>  | 72 | 384.8663 | 3 | 29.65  | 1151.576 | 1.3   |
| <b>PNLKMQACMKU</b>  | 72 | 388.1951 | 3 | 31.34  | 1161.582 | -15.9 |
| <b>KYSFRAFSYKU</b>  | 72 | 324.6729 | 4 | 32.01  | 1294.682 | -15   |
| <b>KARDLSDNLKU</b>  | 72 | 386.8848 | 3 | 34.01  | 1157.652 | -16.5 |
| <b>MLVQGDVPVGKU</b> | 72 | 348.1889 | 3 | 34.04  | 1041.564 | -18.4 |
| <b>YiVLNCAPAKU</b>  | 72 | 453.9007 | 3 | 34.72  | 1358.691 | -8.2  |
| <b>jTHVNFEFYKU</b>  | 72 | 464.8886 | 3 | 36.4   | 1391.659 | -10.9 |
| <b>jTHVMRCFYKU</b>  | 72 | 464.8885 | 3 | 36.49  | 1391.656 | -9    |
| <b>MYOMTSTCGKU</b>  | 72 | 408.8388 | 3 | 37.95  | 1223.5   | -4.3  |
| <b>KVTLNmiZDKU</b>  | 72 | 459.5641 | 3 | 38.27  | 1375.679 | -5.9  |
| <b>LYMBWMGVGKU</b>  | 72 | 340.4185 | 4 | 38.84  | 1357.648 | -2    |
| <b>VDGVQVUbCKU</b>  | 72 | 415.5376 | 3 | 39.2   | 1243.595 | -3.1  |
| <b>cTAYNANVJKU</b>  | 72 | 428.2056 | 3 | 40.38  | 1281.615 | -15.8 |
| <b>TVPDMQFCAKU</b>  | 72 | 569.7644 | 2 | 41.03  | 1137.531 | -14.7 |
| <b>TMPDGMCTYKU</b>  | 72 | 573.2352 | 2 | 42.52  | 1144.471 | -13.6 |
| <b>DTADYTKYGKU</b>  | 72 | 580.7736 | 2 | 45.18  | 1159.551 | -15.9 |
| <b>DRWJETEQRKU</b>  | 72 | 378.9329 | 4 | 45.21  | 1511.719 | -10.7 |
| <b>WQYEABFMGKU</b>  | 72 | 478.5509 | 3 | 47.43  | 1432.64  | -6.4  |
| <b>MGMjEPJLKKU</b>  | 72 | 469.8905 | 3 | 50.08  | 1406.673 | -16.2 |
| <b>ALTDFHQEMKU</b>  | 72 | 406.8629 | 3 | 50.23  | 1217.586 | -15.9 |
| <b>SYLETEQDAKU</b>  | 72 | 591.7822 | 2 | 51.29  | 1181.556 | -5.5  |
| <b>PDWbSSTAKU</b>   | 72 | 403.8566 | 3 | 53.19  | 1208.564 | -13.4 |
| <b>VcEQcGTEYKU</b>  | 72 | 670.8119 | 2 | 54.83  | 1339.62  | -8.3  |
| <b>SMLSZMMVNKU</b>  | 72 | 412.1926 | 3 | 55.44  | 1233.567 | -8.9  |
| <b>DKJYXDAJDKU</b>  | 72 | 535.891  | 3 | 55.89  | 1604.663 | -7.3  |

|              |    |          |   |        |          |       |
|--------------|----|----------|---|--------|----------|-------|
| WGDRYCDGAKU  | 72 | 585.2593 | 2 | 58.55  | 1168.508 | -3.6  |
| NMEMSLSSSKU  | 72 | 556.7492 | 2 | 60.48  | 1111.5   | -14.7 |
| KDMJZGYMDKU  | 72 | 483.1989 | 3 | 60.8   | 1446.598 | -15.8 |
| VMEMSLSSSKU  | 72 | 549.2618 | 2 | 63.43  | 1096.526 | -15.1 |
| YWMAVMVXH KU | 72 | 461.8817 | 3 | 68.24  | 1382.649 | -18.3 |
| EDKcWMAGFKU  | 72 | 652.8066 | 2 | 68.51  | 1303.61  | -8.5  |
| LMEMSLSSSKU  | 72 | 556.2693 | 2 | 68.86  | 1110.541 | -15.4 |
| DZFFPAPMRKU  | 72 | 434.8784 | 3 | 71.87  | 1301.634 | -15.6 |
| cCCHFVLLIKU  | 72 | 482.9008 | 3 | 73.81  | 1445.688 | -5.2  |
| TEWADVHcIKU  | 72 | 490.5594 | 3 | 78.53  | 1468.667 | -7.1  |
| EMWYQCFFSKU  | 72 | 684.2886 | 2 | 79.64  | 1366.584 | -15.4 |
| NENGYDVLOKU  | 72 | 627.796  | 2 | 80.08  | 1253.59  | -10   |
| NENTGEFLOKU  | 72 | 627.7958 | 2 | 80.22  | 1253.59  | -10.3 |
| UXYETFJADKU  | 72 | 513.553  | 3 | 81.63  | 1537.64  | -2    |
| LcSEDTMjBKU  | 72 | 500.8893 | 3 | 81.89  | 1499.657 | -7.1  |
| LAVDVFVNCKU  | 72 | 597.3045 | 2 | 84.62  | 1192.606 | -9.8  |
| FFAGYSRMYKU  | 72 | 634.8077 | 2 | 85.42  | 1267.617 | -12.8 |
| XHDLGWEXcKU  | 72 | 506.5627 | 3 | 95.18  | 1516.654 | 8.3   |
| XNMACMMTQKU  | 72 | 712.7953 | 2 | 106.45 | 1423.597 | -14.9 |
| NNVADRYCRKU  | 71 | 413.2107 | 3 | 23.76  | 1236.615 | -3.5  |
| GYVASQcUXKU  | 71 | 449.2079 | 3 | 26.35  | 1344.615 | -9.7  |
| TYQTSSTPRKU  | 71 | 389.8677 | 3 | 26.88  | 1166.604 | -19.6 |
| LPBYDDRQNKU  | 71 | 474.8966 | 3 | 27.59  | 1421.685 | -12.2 |
| KMPcMWTVEKU  | 71 | 336.4189 | 4 | 28.47  | 1341.665 | -14   |
| ZTVVHZMZOKU  | 71 | 501.5587 | 3 | 29.67  | 1501.675 | -13.4 |
| STADAKWEKKU  | 71 | 388.209  | 3 | 30.09  | 1161.614 | -7.9  |
| SDDEGAbTVKU  | 71 | 569.7559 | 2 | 31.71  | 1137.512 | -12.8 |
| WbSNRVGFGKU  | 71 | 423.2171 | 3 | 32.27  | 1266.644 | -11.3 |
| LBSAKCPZFKU  | 71 | 341.4206 | 4 | 32.49  | 1361.672 | -13.4 |
| TNFOYGQCjKU  | 71 | 458.1998 | 3 | 32.51  | 1371.586 | -6.3  |
| AMPALEGVLKU  | 71 | 343.2034 | 3 | 32.58  | 1026.59  | -1.2  |
| KGbPKDKDQKU  | 71 | 420.8979 | 3 | 32.6   | 1259.68  | -6.5  |
| VNEDDGVGTKU  | 71 | 516.7442 | 2 | 35.38  | 1031.488 | -14   |
| GKMNARQFLKU  | 71 | 397.8924 | 3 | 37.06  | 1190.671 | -12.8 |
| ZTVVXNEFDKU  | 71 | 455.8745 | 3 | 37.6   | 1364.622 | -14.9 |
| AFGAMGFTQKU  | 71 | 528.7612 | 2 | 37.94  | 1055.522 | -13.7 |
| KVTWDYKZDKU  | 71 | 459.5641 | 3 | 38.38  | 1375.689 | -13.2 |
| YAFPEQYDKKU  | 71 | 429.8785 | 3 | 39.67  | 1286.629 | -12.1 |
| DYTVPMPSGKU  | 71 | 547.264  | 2 | 42.62  | 1092.527 | -12.8 |
| NGSDEGIVVKU  | 71 | 597.7858 | 2 | 44.9   | 1193.553 | 3.7   |
| ALDMSUiMKU   | 71 | 662.2809 | 2 | 44.92  | 1322.561 | -10.6 |
| DNESYDbSEKU  | 71 | 652.2651 | 2 | 49.41  | 1302.518 | -1.8  |
| KFMDWAVKQKU  | 71 | 427.2307 | 3 | 49.6   | 1278.691 | -16   |
| MSVVAGGNEKU  | 71 | 495.7534 | 2 | 49.81  | 989.4964 | -4.1  |
| KVGXKMRWLKU  | 71 | 455.595  | 3 | 51.34  | 1363.777 | -10.1 |

|                    |    |          |   |        |          |       |
|--------------------|----|----------|---|--------|----------|-------|
| <b>LNZWDPMVAKU</b> | 71 | 423.2083 | 3 | 52.47  | 1266.618 | -11.8 |
| <b>YSWTKGGNMKU</b> | 71 | 390.8579 | 3 | 52.74  | 1169.565 | -11.4 |
| <b>QQbjQSHJQKU</b> | 71 | 525.9037 | 3 | 52.89  | 1574.708 | -11.9 |
| <b>YDYFYPKELKU</b> | 71 | 455.5613 | 3 | 54.64  | 1363.681 | -13.9 |
| <b>TVSMYSVMNKU</b> | 71 | 579.7793 | 2 | 54.77  | 1157.557 | -11.5 |
| <b>YNLDPMZJKKU</b> | 71 | 490.233  | 3 | 55.32  | 1467.689 | -7.8  |
| <b>VKWQEGQcEKU</b> | 71 | 442.2246 | 3 | 59.88  | 1323.665 | -9.9  |
| <b>EMEMSLSSSKU</b> | 71 | 564.2472 | 2 | 61.72  | 1126.5   | -17.7 |
| <b>UPHLFARTEKU</b> | 71 | 426.5624 | 3 | 63.46  | 1276.679 | -10.4 |
| <b>ACTKTSjSYKU</b> | 71 | 598.7842 | 2 | 67     | 1195.563 | -7.2  |
| <b>CAGVQWWFWKU</b> | 71 | 655.313  | 2 | 67.12  | 1308.623 | -8.4  |
| <b>KYUGCCAIYKU</b> | 71 | 469.1968 | 3 | 67.76  | 1404.592 | -16.5 |
| <b>EDKSFGXQFKU</b> | 71 | 652.8059 | 2 | 68.79  | 1303.606 | -6.5  |
| <b>KNCLSDOEVKU</b> | 71 | 462.8957 | 3 | 69.37  | 1385.687 | -15.3 |
| <b>PUPDZSDMVKU</b> | 71 | 631.778  | 2 | 71.28  | 1261.551 | -7.6  |
| <b>XDEGFVLLIKU</b> | 71 | 477.5696 | 3 | 73.73  | 1429.695 | -5.7  |
| <b>GANWUBQBFKU</b> | 71 | 790.353  | 2 | 80.8   | 1578.708 | -10.6 |
| <b>FMAWLYGNEKU</b> | 71 | 629.2978 | 2 | 91.2   | 1256.601 | -16   |
| <b>ASCCWWVcIKU</b> | 71 | 489.5521 | 3 | 95.2   | 1465.62  | 9.6   |
| <b>XSDFQSTBTKU</b> | 71 | 704.3111 | 2 | 119.52 | 1406.613 | -3.7  |

Library QC sample 2

*U = C-terminal amide, B = DabA, C = DabC, I = DabG, J = DabT, O = AlaA, U = AlaC, X = AlaG, Z = AlaT, b = hAlaA, c = hAlaC, i = hAlaG, j = hAlaT*

| <i>Peptide</i> | <i>ALC (%)</i> | <i>m/z</i> | <i>z</i> | <i>RT</i> | <i>Mass</i> | <i>ppm</i> |
|----------------|----------------|------------|----------|-----------|-------------|------------|
| LNbVPMTDJKU    | 99             | 467.5568   | 3        | 41.42     | 1399.669    | -14.5      |
| OGFDLSHTEKU    | 99             | 412.8596   | 3        | 55.79     | 1235.58     | -18.3      |
| PPMESMSAMKU    | 98             | 369.8318   | 3        | 27.29     | 1106.492    | -16.9      |
| ZDERQUSQMKU    | 98             | 465.8722   | 3        | 32.63     | 1394.611    | -11.5      |
| VGVPVLWGEKU    | 98             | 361.5452   | 3        | 37.22     | 1081.628    | -13.5      |
| jPQRCEYEMMKU   | 98             | 465.2047   | 3        | 43.03     | 1392.607    | -10.7      |
| QELQDYKKGKU    | 98             | 424.2114   | 3        | 43.8      | 1269.635    | -18.1      |
| PYFJEYSYLKU    | 98             | 492.2309   | 3        | 48.59     | 1473.689    | -12        |
| AYPNFLMPHKU    | 98             | 406.2074   | 3        | 50.85     | 1215.622    | -18.1      |
| AYPNFPMVHKU    | 98             | 401.5353   | 3        | 52.22     | 1201.607    | -18.9      |
| DSATEVGWMKU    | 97             | 561.759    | 2        | 24.6      | 1121.518    | -12.5      |
| LVGVNROYNYKU   | 97             | 317.1764   | 4        | 25.01     | 1264.69     | -10.8      |
| APVEAGWAFKU    | 97             | 358.8577   | 3        | 27.47     | 1073.566    | -13.4      |
| ASNLPEECJKU    | 97             | 628.2813   | 2        | 28.85     | 1254.562    | -10.9      |
| FCGSQWVEKKU    | 97             | 404.1996   | 3        | 28.92     | 1209.596    | -16.1      |
| GVNTVYDYKUKU   | 97             | 407.5325   | 3        | 29.6      | 1219.587    | -9.7       |
| DHFNQQFDJKU    | 97             | 481.882    | 3        | 30.83     | 1442.628    | -3         |
| DXVQYQKWAKU    | 97             | 462.232    | 3        | 33.27     | 1383.679    | -3.8       |
| FHGVAYVFXXKU   | 97             | 429.5515   | 3        | 38.6      | 1285.647    | -11        |
| FLNAGQSSSKU    | 97             | 519.2648   | 2        | 44.01     | 1036.53     | -14.5      |
| WNKLDTFPMKU    | 97             | 426.886    | 3        | 51.11     | 1277.659    | -17.9      |
| YDLSYNjSBKU    | 97             | 491.5511   | 3        | 51.93     | 1471.65     | -12.9      |
| DAFFNPDPcKU    | 97             | 415.2008   | 3        | 56.74     | 1242.575    | 4.5        |
| TjOGGYLQVKU    | 97             | 639.3158   | 2        | 61.41     | 1276.639    | -17.5      |
| PVVGELDVQKU    | 97             | 541.8057   | 2        | 61.96     | 1081.613    | -15        |
| ZEYDTSFBFKU    | 97             | 502.5467   | 3        | 63.75     | 1504.642    | -16        |
| LYYRLSMPYKU    | 97             | 444.9071   | 3        | 64.64     | 1331.706    | -4.9       |
| KYAPFFDAYKU    | 97             | 416.8812   | 3        | 83.71     | 1247.634    | -9.6       |
| TKGSQQLDYKU    | 96             | 389.537    | 3        | 29.44     | 1165.609    | -17.2      |
| GVEMVPMecKU    | 96             | 404.8606   | 3        | 35.57     | 1211.576    | -13.2      |
| GVEETVEecKU    | 96             | 404.8596   | 3        | 35.67     | 1211.575    | -14.7      |
| QMEFYADLbKU    | 96             | 454.5433   | 3        | 36.98     | 1360.63     | -16.1      |
| KSHTYDQLSKU    | 96             | 402.5405   | 3        | 41.64     | 1204.62     | -17.1      |
| VNFDSKGEVKU    | 96             | 374.5294   | 3        | 46.93     | 1120.588    | -18.9      |
| LEEjVKPADKU    | 96             | 412.8874   | 3        | 55.12     | 1235.648    | -6.2       |
| INFYSZEFYKU    | 96             | 528.2289   | 3        | 61.94     | 1581.674    | -5.9       |
| EPPPCLVfYKU    | 96             | 596.3054   | 2        | 64.12     | 1190.616    | -16.4      |
| DSMSEFLYDKU    | 96             | 617.2769   | 2        | 86.66     | 1232.538    | 0.7        |
| GLLIQDTYJKU    | 95             | 490.2335   | 3        | 22.63     | 1467.702    | -15.8      |

|              |    |          |   |       |          |       |
|--------------|----|----------|---|-------|----------|-------|
| VSTYBSWGYKU  | 95 | 455.5468 | 3 | 23.63 | 1363.636 | -12.9 |
| ADUEMQFDNKG  | 95 | 426.1833 | 3 | 24.45 | 1275.53  | -1.6  |
| FVDTGAWAJKU  | 95 | 420.5369 | 3 | 24.48 | 1258.605 | -12.9 |
| VUKNDSDcHKU  | 95 | 439.2052 | 3 | 27.21 | 1314.615 | -15.8 |
| APMPAGEKFKU  | 95 | 358.8579 | 3 | 27.74 | 1073.569 | -15.9 |
| YSGSQWNNKKU  | 95 | 404.1997 | 3 | 28.89 | 1209.589 | -9.8  |
| POMPANANVJKU | 95 | 428.2049 | 3 | 39.48 | 1281.612 | -14.9 |
| jNSSMGDFLKU  | 95 | 603.7717 | 2 | 43.84 | 1205.547 | -14.9 |
| VFAPLERATKU  | 95 | 377.5577 | 3 | 43.93 | 1129.661 | -8.4  |
| EGLAEOELIKU  | 95 | 442.5533 | 3 | 44.32 | 1324.639 | -0.7  |
| jSDCEGTyIKU  | 95 | 498.2087 | 3 | 49.15 | 1491.617 | -8.5  |
| VOMPYPGPKKKU | 95 | 417.5677 | 3 | 50.2  | 1249.687 | -4.2  |
| ELLDGTYCMKU  | 95 | 586.2695 | 2 | 52.42 | 1170.541 | -14.3 |
| DAFFNPDYKKU  | 95 | 415.2003 | 3 | 57.09 | 1242.603 | -19.4 |
| YDLVDCPPVKU  | 95 | 574.2867 | 2 | 59.18 | 1146.574 | -13.3 |
| LYVXLAFPYKU  | 95 | 444.907  | 3 | 64.53 | 1331.714 | -11   |
| OGCDCLPQQKU  | 94 | 497.5651 | 3 | 25.27 | 1489.694 | -13.9 |
| EYVSRAVSQKU  | 94 | 389.212  | 3 | 29.13 | 1164.625 | -9.2  |
| FTXSDETNSKU  | 94 | 416.5114 | 3 | 29.32 | 1246.533 | -16.3 |
| VFAPLQTRAKU  | 94 | 377.2294 | 3 | 31.15 | 1128.677 | -9.2  |
| ACFFYEHRVKU  | 94 | 433.5463 | 3 | 31.93 | 1297.639 | -16.8 |
| VDTCYCFNbKU  | 94 | 486.5453 | 3 | 32.35 | 1456.633 | -12.7 |
| FKQUTKPLAKU  | 94 | 413.9104 | 3 | 33.29 | 1238.725 | -12.4 |
| FKLZTQPLAKU  | 94 | 413.9118 | 3 | 33.35 | 1238.714 | 0     |
| GVVDFIAALKU  | 94 | 384.881  | 3 | 36.1  | 1151.621 | 0.6   |
| LQVEMHCPMKU  | 94 | 405.5264 | 3 | 37.69 | 1213.577 | -16.1 |
| VFcLYCETSKU  | 94 | 428.2084 | 3 | 38.48 | 1281.614 | -8.6  |
| IQNMKLEQSKU  | 94 | 465.8959 | 3 | 39.22 | 1394.683 | -12.2 |
| XHZAMELPCcKU | 94 | 478.5568 | 3 | 39.93 | 1432.65  | -0.8  |
| VZBYRFLYQKU  | 94 | 529.2721 | 3 | 40.03 | 1584.8   | -3.7  |
| AFMASDSETKU  | 94 | 543.2437 | 2 | 41.17 | 1084.486 | -12.1 |
| QKMSCMFQMKU  | 94 | 420.8582 | 3 | 43.94 | 1259.565 | -9.4  |
| TGXLDILPQKU  | 94 | 461.2252 | 3 | 44.76 | 1380.675 | -15.5 |
| QPELGVTtJKU  | 94 | 394.2074 | 3 | 45.07 | 1179.622 | -18.1 |
| QELEDYyKGKU  | 94 | 424.5395 | 3 | 46.62 | 1270.619 | -17.8 |
| GFAVHNNJMKU  | 94 | 428.2041 | 3 | 48.46 | 1281.599 | -6.9  |
| QTYDEAELTKU  | 94 | 598.7834 | 2 | 51.04 | 1195.572 | -16.6 |
| jDbLPLRCYKU  | 94 | 478.5716 | 3 | 51.33 | 1432.707 | -10.1 |
| FYGVAYVOYKU  | 94 | 438.2183 | 3 | 54.75 | 1311.651 | -13.7 |
| LMIYCYFFDKU  | 94 | 760.3266 | 2 | 67.14 | 1518.653 | -9.3  |
| VYRAFYCGSKU  | 93 | 398.1991 | 3 | 27.2  | 1191.586 | -8.7  |
| PAVEAGAWFKU  | 93 | 358.8577 | 3 | 27.48 | 1073.566 | -13.4 |
| VQUBMPVPQKU  | 93 | 460.8977 | 3 | 27.5  | 1379.693 | -16.1 |
| DHFGGKBDJKU  | 93 | 481.882  | 3 | 28.3  | 1442.645 | -14.2 |
| GVVAQQCVLKU  | 93 | 397.8981 | 3 | 34.12 | 1190.684 | -9.3  |

|             |    |          |   |       |          |       |
|-------------|----|----------|---|-------|----------|-------|
| CPPMPMGVYKU | 93 | 374.5125 | 3 | 36.41 | 1120.523 | -6.6  |
| LVGEFVBWKKU | 93 | 345.6898 | 4 | 37.46 | 1378.756 | -19.2 |
| QLVEDHSEMKU | 93 | 405.5264 | 3 | 37.62 | 1213.576 | -15.4 |
| IQNCRLEQSKU | 93 | 465.8877 | 3 | 39.3  | 1394.658 | -11.7 |
| NMOPANiLLKU | 93 | 446.5581 | 3 | 40.95 | 1336.669 | -12.4 |
| FMLCFNjSBKU | 93 | 491.5519 | 3 | 42.63 | 1471.651 | -11.9 |
| QNDJMELYKKU | 93 | 478.5569 | 3 | 43.67 | 1432.673 | -16.5 |
| GVjNDFOGLKU | 93 | 421.2052 | 3 | 45.08 | 1260.608 | -11.3 |
| NNVcXGEPAKU | 93 | 621.2866 | 2 | 52.43 | 1240.578 | -15.3 |
| LVFPGVIOFKU | 93 | 467.5802 | 3 | 53.59 | 1399.737 | -12.7 |
| MMRMMTVGEKU | 93 | 404.8588 | 3 | 54.1  | 1211.565 | -8.3  |
| SEMNEVZMLKU | 93 | 637.7897 | 2 | 55.55 | 1273.58  | -11.5 |
| TjGFXLAGVKU | 93 | 610.8073 | 2 | 59.31 | 1219.618 | -14.6 |
| LYYLAVOPYKU | 93 | 666.8578 | 2 | 64.57 | 1331.714 | -9.6  |
| LMIYJGUIDKU | 93 | 585.2448 | 3 | 66.79 | 1752.734 | -12.1 |
| MGFTCSLLFKU | 93 | 382.5272 | 3 | 78.33 | 1144.577 | -15.4 |
| YUUYGCYFKKU | 92 | 477.5469 | 3 | 24.92 | 1429.635 | -11.2 |
| KLTPFcCSKU  | 92 | 415.2052 | 3 | 26.52 | 1242.607 | -10.6 |
| YQTCLLGVAKU | 92 | 365.5367 | 3 | 26.53 | 1093.596 | -6.5  |
| jFjXGGKPSKU | 92 | 453.2116 | 3 | 31.79 | 1356.638 | -18.3 |
| LGNCNLGLKKU | 92 | 353.5387 | 3 | 37.17 | 1057.607 | -11.8 |
| DWDLNANVJKU | 92 | 428.2051 | 3 | 39.38 | 1281.607 | -10.7 |
| SAXYYPTUAKU | 92 | 433.8692 | 3 | 40.93 | 1298.59  | -3.6  |
| AFMACAMETKU | 92 | 551.2404 | 2 | 41.31 | 1100.482 | -14.1 |
| NDcFKPMMYKU | 92 | 456.209  | 3 | 42.71 | 1365.629 | -17.3 |
| FDBINDAYHKU | 92 | 394.4185 | 4 | 43.27 | 1573.66  | -9.8  |
| VDVGPETFFKU | 92 | 379.8652 | 3 | 45.76 | 1136.587 | -11.3 |
| UNSOEMWYFKU | 92 | 496.5421 | 3 | 47.63 | 1486.631 | -17.8 |
| VEYFEbMYDKU | 92 | 480.8782 | 3 | 47.82 | 1439.625 | -8.4  |
| jYVGGYLjIKU | 92 | 725.8374 | 2 | 63.71 | 1449.685 | -16.9 |
| FTFQSMQMMKU | 92 | 639.2847 | 2 | 67.93 | 1276.577 | -17   |
| IQNMQLQSKU  | 91 | 465.8871 | 3 | 23.52 | 1394.647 | -5.1  |
| SLAMTCPZTKU | 91 | 573.2679 | 2 | 23.56 | 1144.537 | -13.6 |
| EYTZNjRIGKU | 91 | 521.2375 | 3 | 24.76 | 1560.689 | 0.9   |
| KLNCKEUDSKU | 91 | 415.2057 | 3 | 26.43 | 1242.614 | -14.8 |
| bAGVSKSjLKU | 91 | 405.89   | 3 | 27.51 | 1214.656 | -6.4  |
| LNPGEpGJNKU | 91 | 397.5318 | 3 | 28.93 | 1189.58  | -5.1  |
| NIDPYHRRFKU | 91 | 508.2516 | 3 | 31.32 | 1521.744 | -7.2  |
| RUVPGCTFFKU | 91 | 309.1585 | 4 | 32.66 | 1232.624 | -15.1 |
| FKLPUFPLAKU | 91 | 310.6852 | 4 | 33.25 | 1238.729 | -13.6 |
| FUFIAPEGVKU | 91 | 341.9186 | 4 | 34.54 | 1363.653 | -5.3  |
| MMNKQFDYCKU | 91 | 436.1967 | 3 | 36.97 | 1305.567 | 1     |
| EEAPPJOADKU | 91 | 442.5327 | 3 | 39.83 | 1324.586 | -7.6  |
| KYLYEMUMYKU | 91 | 483.2296 | 3 | 45.62 | 1446.679 | -8.1  |
| CHAEQcULcKU | 91 | 515.2433 | 3 | 48.81 | 1542.719 | -6.8  |



|             |    |          |   |       |          |       |
|-------------|----|----------|---|-------|----------|-------|
| EGQDNOPbMKU | 91 | 447.195  | 3 | 49.36 | 1338.57  | -5.4  |
| KYMPLELOYKU | 91 | 463.2454 | 3 | 49.89 | 1386.723 | -6.1  |
| MPYYMMWOMKU | 91 | 495.209  | 3 | 50.5  | 1482.618 | -8.7  |
| MYLCFNjSBKU | 91 | 496.8815 | 3 | 52.09 | 1487.646 | -15.9 |
| VVSPYTPbAKU | 91 | 393.5453 | 3 | 59.78 | 1177.631 | -14.3 |
| XANJMZEFYKU | 91 | 528.2172 | 3 | 61.01 | 1581.649 | -11.9 |
| OSNMJZEFYKU | 91 | 528.2169 | 3 | 61.13 | 1581.649 | -12.6 |
| INFYYCEYYKU | 91 | 528.2153 | 3 | 61.36 | 1581.645 | -13.2 |
| TjGFGWFQVKU | 91 | 639.3158 | 2 | 61.42 | 1276.632 | -12   |
| cYZAMQNYKKU | 91 | 717.3338 | 2 | 71.17 | 1432.664 | -7.5  |
| DPTUMSSCLKU | 90 | 436.8684 | 3 | 23.01 | 1307.599 | -12.2 |
| ADSMYAWJDKU | 90 | 451.1884 | 3 | 24.19 | 1350.562 | -13.7 |
| DSEASKDSjKU | 90 | 392.1765 | 3 | 24.3  | 1173.523 | -13.1 |
| ZKMGTFKLGKU | 90 | 401.8868 | 3 | 24.81 | 1202.659 | -17.2 |
| EMEMAScPMKU | 90 | 416.1761 | 3 | 28.04 | 1245.527 | -16.5 |
| KYXPECLVGKU | 90 | 468.5761 | 3 | 30.84 | 1402.717 | -7.6  |
| LQNQLJZACKU | 90 | 689.3266 | 2 | 33.32 | 1376.658 | -13.7 |
| MOVQYQKWAKU | 90 | 462.2332 | 3 | 33.5  | 1383.698 | -14.9 |
| VMMRGLXSXKU | 90 | 454.2179 | 3 | 33.82 | 1359.651 | -14.2 |
| VGXBDNYLVKU | 90 | 467.8948 | 3 | 35.47 | 1400.675 | -8.8  |
| LZGMjTEYAKU | 90 | 658.2991 | 2 | 35.91 | 1314.6   | -12.3 |
| GIIFMQPLZKU | 90 | 532.913  | 3 | 39.06 | 1595.726 | -5.5  |
| SAXUDKTUAKU | 90 | 433.8693 | 3 | 40.76 | 1298.598 | -9    |
| QNGGEDQDLKU | 90 | 551.7497 | 2 | 41.45 | 1101.505 | -18.4 |
| LQWVFOSjAKU | 90 | 464.2353 | 3 | 44.12 | 1389.702 | -13.1 |
| LVDKGHSbRKU | 90 | 419.5656 | 3 | 45.96 | 1255.697 | -17.1 |
| bLGTCLAVHKU | 90 | 386.8734 | 3 | 49.4  | 1157.62  | -18.4 |
| DYLSYNjBSKU | 90 | 491.5524 | 3 | 51.79 | 1471.65  | -10.1 |
| SAFLJGOGGKU | 90 | 603.288  | 2 | 52.84 | 1204.581 | -15.8 |
| TSGFXLAGVKU | 90 | 549.7845 | 2 | 54.31 | 1097.573 | -16.8 |
| QNNKTYDjSKU | 90 | 435.873  | 3 | 57.32 | 1304.608 | -8.3  |
| ELLGDTCFMKU | 90 | 578.2717 | 2 | 78.04 | 1154.546 | -15.1 |
| VVPBVDAFFKU | 90 | 432.5632 | 3 | 88.01 | 1294.688 | -15.2 |
| FKQTUKPLAKU | 89 | 310.6847 | 4 | 26.67 | 1238.725 | -12   |
| LSCSTUAFIKU | 89 | 442.867  | 3 | 27.3  | 1325.604 | -18.5 |
| SLAMTCPjSKU | 89 | 382.5132 | 3 | 27.75 | 1144.534 | -14.2 |
| LPPGYLPMGKU | 89 | 357.8697 | 3 | 27.99 | 1070.595 | -7.1  |
| MAAGSTFVXKU | 89 | 377.5187 | 3 | 28.28 | 1129.545 | -9.4  |
| DHFNKGbDJKU | 89 | 481.8811 | 3 | 28.55 | 1442.646 | -17.1 |
| GVYDLOPKKKU | 89 | 417.5693 | 3 | 30.12 | 1249.704 | -14.7 |
| VODLYGPKKKU | 89 | 417.5691 | 3 | 30.21 | 1249.704 | -15.1 |
| EFGQGSVMPKU | 89 | 539.7638 | 2 | 34.68 | 1077.528 | -13.5 |
| TYKDDDCMEKU | 89 | 465.5366 | 3 | 35.17 | 1393.588 | -0.4  |
| ZMGKAHFANKU | 89 | 599.2935 | 2 | 36.46 | 1196.587 | -12.6 |
| VABYRYPYKKU | 89 | 366.1998 | 4 | 36.92 | 1460.773 | -1.9  |

|              |    |          |   |       |          |       |
|--------------|----|----------|---|-------|----------|-------|
| AVHFSEAAJKU  | 89 | 408.8685 | 3 | 38.75 | 1223.6   | -13.6 |
| ESMNEVZMLKU  | 89 | 637.79   | 2 | 39.25 | 1273.58  | -11.1 |
| cYZCDELYKKU  | 89 | 483.8885 | 3 | 39.84 | 1448.648 | -2.5  |
| YLOYCRJEDKU  | 89 | 501.2234 | 3 | 40.26 | 1500.665 | -11   |
| cLGNUQMQRVQU | 89 | 430.883  | 3 | 40.35 | 1289.638 | -8.4  |
| AYPSSSLVHKU  | 89 | 363.1943 | 3 | 45.42 | 1086.582 | -19.6 |
| USDUGDMTVKU  | 89 | 404.5049 | 3 | 46.7  | 1210.515 | -18.2 |
| LQFAGBJSHKU  | 89 | 457.5558 | 3 | 47.85 | 1369.666 | -15.1 |
| KGYMQSVMXKU  | 89 | 430.8722 | 3 | 54.38 | 1289.612 | -13.5 |
| jDDEXFFFKU   | 89 | 497.5324 | 3 | 58.04 | 1489.598 | -15.3 |
| KYLQDUJMYKU  | 89 | 483.2303 | 3 | 59.41 | 1446.683 | -9.3  |
| INFFCZEFYKU  | 89 | 528.2289 | 3 | 61.95 | 1581.656 | 5.4   |
| GEYFFMZYKKU  | 89 | 469.5519 | 3 | 66.38 | 1405.649 | -10.8 |
| SDMSEFLMFKU  | 89 | 617.2755 | 2 | 86.76 | 1232.557 | -16.6 |
| LVjcSPMSNKU  | 88 | 426.5443 | 3 | 23.36 | 1276.628 | -13.6 |
| EGAERWKYEKU  | 88 | 432.2209 | 3 | 24.19 | 1293.647 | -4.2  |
| MDVGSUCPVKU  | 88 | 557.7529 | 2 | 25.15 | 1113.506 | -13.1 |
| GOCDiLNQQKU  | 88 | 497.5651 | 3 | 25.28 | 1489.674 | -0.5  |
| LPPGYGRQGKU  | 88 | 357.8711 | 3 | 25.93 | 1070.598 | -6.6  |
| GVLOCMjAHKU  | 88 | 473.5644 | 3 | 26.72 | 1417.682 | -7.6  |
| FMAHCNCTQKU  | 88 | 443.8612 | 3 | 28.52 | 1328.582 | -15.2 |
| TPKYMGEHBKU  | 88 | 455.5491 | 3 | 28.66 | 1363.651 | -18.6 |
| FCGSQWPMKKU  | 88 | 404.1996 | 3 | 28.92 | 1209.579 | -1.4  |
| ATMUNKEjbKU  | 88 | 476.5513 | 3 | 29.79 | 1426.656 | -16.9 |
| KYMGQNCLRKU  | 88 | 463.2448 | 3 | 30.81 | 1386.726 | -9.4  |
| FPTCYRQXJKU  | 88 | 509.9017 | 3 | 31.73 | 1526.69  | -4.7  |
| jFjYELGPSKU  | 88 | 453.2128 | 3 | 32.64 | 1356.64  | -17.5 |
| LVDWAPSWRKU  | 88 | 419.5656 | 3 | 34.6  | 1255.683 | -6.2  |
| LEFMKMCOQKU  | 88 | 454.2178 | 3 | 34.81 | 1359.636 | -3.3  |
| ZcMSQPNNMYKU | 88 | 462.8687 | 3 | 36.86 | 1385.594 | -6.9  |
| PcEYNPPFYKU  | 88 | 449.8809 | 3 | 37.71 | 1346.638 | -12.3 |
| DSEASRAjKU   | 88 | 587.7615 | 2 | 38.82 | 1173.517 | -7    |
| ATMUEELjbKU  | 88 | 476.5501 | 3 | 39.64 | 1426.645 | -11.6 |
| LENKQFDCYKU  | 88 | 429.5464 | 3 | 42.63 | 1285.613 | 3.9   |
| WNZSGTESDKU  | 88 | 609.253  | 2 | 45.13 | 1216.511 | -16.1 |
| jNSSSTELDKU  | 88 | 594.7668 | 2 | 46.14 | 1187.539 | -16.6 |
| EYGHMMMjAKU  | 88 | 435.8466 | 3 | 46.2  | 1304.544 | -19.5 |
| LNVLDTDCYKU  | 88 | 591.7916 | 2 | 47.41 | 1181.575 | -5.3  |
| ELLGDTFCMKU  | 88 | 578.2724 | 2 | 52.39 | 1154.546 | -14   |
| VEYFEjjLYKU  | 88 | 503.236  | 3 | 57.25 | 1506.709 | -14.8 |
| EGAMVFAQSKU  | 88 | 533.7623 | 2 | 59    | 1065.528 | -16.4 |
| YDLVDEGNPKU  | 88 | 574.7765 | 2 | 60.48 | 1147.551 | -11   |
| ENEVGYLjIKU  | 88 | 697.3271 | 2 | 61.59 | 1392.651 | -8.2  |
| FPVVQXGTQKU  | 88 | 611.8168 | 2 | 64.39 | 1221.637 | -14.4 |
| EPPEAKCKYKU  | 88 | 596.3071 | 2 | 64.41 | 1190.612 | -10.3 |

|              |    |          |   |       |          |       |
|--------------|----|----------|---|-------|----------|-------|
| VQSNVPCcKU   | 87 | 405.534  | 3 | 24.52 | 1213.599 | -15.9 |
| MSVVCPhVEKU  | 87 | 376.5225 | 3 | 28.99 | 1126.563 | -15.2 |
| WLDYMSDRKKU  | 87 | 447.5555 | 3 | 29.54 | 1339.671 | -19.4 |
| VOLYDGPkKKU  | 87 | 417.5693 | 3 | 30.12 | 1249.704 | -14.7 |
| LZTSCTbZUKU  | 87 | 480.5421 | 3 | 30.57 | 1438.623 | -12.8 |
| MYVSYPGXrKU  | 87 | 440.5474 | 3 | 30.72 | 1318.635 | -11.4 |
| GHXGNQVMXKU  | 87 | 437.1948 | 3 | 31.28 | 1308.575 | -9.9  |
| DANPYGjZKU   | 87 | 467.868  | 3 | 35.97 | 1400.595 | -8.9  |
| GcHFYAMPbKU  | 87 | 454.5433 | 3 | 36.98 | 1360.628 | -14.7 |
| VABYRFLPcKU  | 87 | 366.1991 | 4 | 37    | 1460.781 | -9.3  |
| EGGFDEiWAKU  | 87 | 424.5216 | 3 | 38.75 | 1270.549 | -4.3  |
| QDLQTFMjSKU  | 87 | 435.8716 | 3 | 41.52 | 1304.616 | -17.3 |
| EQVEAYjKFKU  | 87 | 450.5638 | 3 | 41.54 | 1348.675 | -3.6  |
| FUCESMMBQKU  | 87 | 535.8911 | 3 | 43.56 | 1604.673 | -13.5 |
| GVNTVYMFIKU  | 87 | 450.2173 | 3 | 46.37 | 1347.65  | -14.6 |
| PNYFJQXcLKU  | 87 | 794.8656 | 2 | 51.71 | 1587.737 | -12.5 |
| KXMQSVMYGKU  | 87 | 430.8709 | 3 | 54.24 | 1289.612 | -16.5 |
| ZAPAYPVMXKU  | 87 | 645.804  | 2 | 54.25 | 1289.609 | -11.8 |
| CbLYPVZDGKU  | 87 | 436.2035 | 3 | 54.4  | 1305.599 | -8.1  |
| CHLQYDYKGGU  | 87 | 627.3029 | 2 | 60.69 | 1252.602 | -8.8  |
| CHCPUjLLcKU  | 86 | 386.6838 | 4 | 24.28 | 1542.727 | -13.2 |
| GVCSSMRKKU   | 86 | 375.1893 | 3 | 26.08 | 1122.564 | -15.7 |
| WQQQQMAQZKU  | 86 | 457.2176 | 3 | 26.32 | 1368.636 | -3.5  |
| DAHxDFRLGKU  | 86 | 426.5452 | 3 | 27.03 | 1276.617 | -2.7  |
| GTBZbCVMTKU  | 86 | 476.2077 | 3 | 28.18 | 1425.615 | -9.6  |
| FTXDCETNSKU  | 86 | 421.8428 | 3 | 29.38 | 1262.51  | -2.6  |
| IFGLECLGVKU  | 86 | 351.6835 | 4 | 30.75 | 1402.716 | -7.9  |
| KYLYCjYRCKU  | 86 | 483.2292 | 3 | 31.29 | 1446.687 | -14.6 |
| DHFELQEDJKU  | 86 | 475.8783 | 3 | 31.31 | 1424.628 | -10.2 |
| GEVPYNGDAKU  | 86 | 350.1753 | 3 | 31.64 | 1047.499 | 5.3   |
| ZPVECGPKFKU  | 86 | 400.1996 | 3 | 34.43 | 1197.596 | -16.2 |
| LQNQLJCGjKU  | 86 | 689.3276 | 2 | 36.12 | 1376.655 | -10.1 |
| ZMGQANQLNKU  | 86 | 599.2942 | 2 | 36.52 | 1196.572 | 1.5   |
| TYLVTTETNNKU | 86 | 394.5377 | 3 | 37.57 | 1180.609 | -15   |
| LMPNVGBlJKU  | 86 | 471.2402 | 3 | 38.34 | 1410.72  | -15   |
| WAVEAYjKFKU  | 86 | 338.1744 | 4 | 41.54 | 1348.69  | -16   |
| AYVSGDLVHKU  | 86 | 363.1941 | 3 | 45.12 | 1086.582 | -20   |
| SDUSLWNDXKU  | 86 | 455.1969 | 3 | 45.89 | 1362.581 | -9.1  |
| VEYTTCUSPKU  | 86 | 603.7745 | 2 | 47.94 | 1205.55  | -12.7 |
| FMLSyTMCDKU  | 86 | 462.5402 | 3 | 51.05 | 1384.622 | -16.8 |
| MSPNYLDVHKU  | 86 | 401.5354 | 3 | 52.3  | 1201.591 | -5.8  |
| QNLGDTYMCKU  | 86 | 586.2681 | 2 | 52.55 | 1170.516 | 4.8   |
| jDLPLSATYKU  | 86 | 608.3137 | 2 | 53.32 | 1214.627 | -11.3 |
| VGAViEALFKU  | 86 | 583.8209 | 2 | 56.51 | 1165.636 | -7.7  |
| TEFYMNLPQKU  | 86 | 635.3097 | 2 | 68.97 | 1268.622 | -13.8 |

|              |    |          |   |       |          |       |
|--------------|----|----------|---|-------|----------|-------|
| YYLAFVbMCKU  | 86 | 452.215  | 3 | 71.66 | 1353.643 | -14.8 |
| OSDQPFFIWKU  | 86 | 516.8992 | 3 | 73.94 | 1547.691 | -9.7  |
| VRXGGKLSJKU  | 85 | 388.8875 | 3 | 21.44 | 1163.664 | -19.7 |
| ADUECRFDNKKU | 85 | 319.8891 | 4 | 24.46 | 1275.542 | -11   |
| DHFELQMMJKU  | 85 | 481.882  | 3 | 28.3  | 1442.639 | -10.3 |
| BDjDLyLGvKU  | 85 | 469.2306 | 3 | 29.02 | 1404.681 | -7.9  |
| QRMFYLTCHKU  | 85 | 332.165  | 4 | 29.18 | 1324.653 | -16.8 |
| VOEMFGPKKKU  | 85 | 422.9005 | 3 | 30.47 | 1265.681 | -1.5  |
| DNTFKGANDKU  | 85 | 370.1813 | 3 | 35.14 | 1107.531 | -7.9  |
| DAGGPYjZKU   | 85 | 467.8682 | 3 | 35.83 | 1400.593 | -7.5  |
| GGXXEDGZFKU  | 85 | 448.5117 | 3 | 44.54 | 1342.53  | -12.3 |
| AGPQNRTYFKU  | 85 | 394.2075 | 3 | 44.99 | 1179.615 | -12   |
| GMSMYEjWNKU  | 85 | 451.8662 | 3 | 45.38 | 1352.561 | 11.5  |
| cTLKMSiFFKU  | 85 | 357.9353 | 4 | 47.42 | 1427.722 | -6.8  |
| WGKTFVNRCKU  | 85 | 413.2216 | 3 | 50.04 | 1236.655 | -9.9  |
| WNKMPTFVEKU  | 85 | 426.8854 | 3 | 51.23 | 1277.659 | -19.3 |
| PMYFEjjLYKU  | 85 | 503.236  | 3 | 57.26 | 1506.691 | -2.9  |
| YLYFUQHTMKU  | 85 | 470.5575 | 3 | 58.41 | 1408.671 | -14.4 |
| LUSSCMVFeku  | 85 | 408.1939 | 3 | 67.99 | 1221.564 | -3    |
| QVFPEQDNnKU  | 85 | 609.292  | 2 | 76.71 | 1216.584 | -11.8 |
| XAQNBLEQSKU  | 84 | 471.2177 | 3 | 23.45 | 1410.655 | -17.1 |
| EYtZNFbIGKU  | 84 | 521.2231 | 3 | 25.05 | 1560.667 | -12.2 |
| GVNXFVbZiKU  | 84 | 510.5723 | 3 | 25.16 | 1528.701 | -3.7  |
| AHWXSjNAJKU  | 84 | 522.2226 | 3 | 25.4  | 1563.674 | -17.8 |
| LWDJDDRkckU  | 84 | 512.2471 | 3 | 27.31 | 1533.736 | -10.8 |
| EREQKVfGEKU  | 84 | 416.8868 | 3 | 28.96 | 1247.662 | -18.8 |
| RAPDAPGjNKU  | 84 | 595.7949 | 2 | 28.98 | 1189.591 | -13.1 |
| OCMQDFDCTKU  | 84 | 431.8369 | 3 | 29.24 | 1292.485 | 3     |
| QOFYCGlKTKU  | 84 | 430.8835 | 3 | 29.51 | 1289.645 | -12.6 |
| ATMUELEjbKU  | 84 | 476.5513 | 3 | 29.8  | 1426.645 | -9    |
| KGjPARljGKU  | 84 | 311.6777 | 4 | 30.15 | 1242.689 | -5.7  |
| LFSGIPSKAKU  | 84 | 408.8873 | 3 | 30.47 | 1223.651 | -9.2  |
| KYOPECLGVKU  | 84 | 463.2451 | 3 | 30.68 | 1386.722 | -6.4  |
| LZTSjTCOUKU  | 84 | 480.5419 | 3 | 30.69 | 1438.624 | -14.1 |
| KYLYcjQMYKU  | 84 | 483.2292 | 3 | 31.3  | 1446.676 | -6.8  |
| SDCPVTQCQKU  | 84 | 468.5563 | 3 | 34.27 | 1402.661 | -9.7  |
| SGGAMSQJYKU  | 84 | 398.5119 | 3 | 34.49 | 1192.525 | -9.4  |
| ZSCSPQYRWKU  | 84 | 450.2049 | 3 | 35.16 | 1347.614 | -15.9 |
| GVOIDNYLVKU  | 84 | 467.8941 | 3 | 35.38 | 1400.68  | -14   |
| DANPYEiHZKU  | 84 | 467.8685 | 3 | 35.89 | 1400.598 | -10   |
| XGGPDPGEAKU  | 84 | 523.7338 | 2 | 36.09 | 1045.469 | -15.1 |
| YiKSVVLTCKU  | 84 | 425.2308 | 3 | 36.21 | 1272.677 | -4.8  |
| TFTEYKUQKU   | 84 | 676.3336 | 2 | 37.26 | 1350.668 | -11.4 |
| GVCQNLGLKKU  | 84 | 353.539  | 3 | 37.44 | 1057.607 | -10.9 |
| QLVEMHPCMKU  | 84 | 405.5264 | 3 | 37.62 | 1213.577 | -16   |

|                     |    |          |   |       |          |       |
|---------------------|----|----------|---|-------|----------|-------|
| <b>XAO</b> LLGVAKU  | 84 | 403.2306 | 3 | 38.38 | 1206.685 | -12.2 |
| <b>VCN</b> LMTNDAKU | 84 | 419.2039 | 3 | 44.46 | 1254.609 | -15.2 |
| <b>LQFQ</b> bgjSHKU | 84 | 457.5556 | 3 | 47.93 | 1369.668 | -16.7 |
| <b>VTNT</b> FWPCTKU | 84 | 399.1954 | 3 | 48.05 | 1194.586 | -17.9 |
| <b>TYLV</b> MCLNNU  | 84 | 599.3011 | 2 | 49.27 | 1196.605 | -14.1 |
| <b>LVMX</b> VLQOFKU | 84 | 350.9372 | 4 | 53.46 | 1399.741 | -15.1 |
| <b>cYUN</b> QAMLAKU | 84 | 437.8769 | 3 | 55.77 | 1310.627 | -13.8 |
| <b>YDLP</b> MDGPLKU | 84 | 574.2868 | 2 | 59.26 | 1146.574 | -13.2 |
| <b>TVYV</b> UPPDYKU | 84 | 420.8782 | 3 | 60.64 | 1259.63  | -13.6 |
| <b>DMOP</b> AQXLLKU | 84 | 446.8837 | 3 | 61.4  | 1337.652 | -17.3 |
| <b>TjGF</b> GYQNVKU | 84 | 611.2977 | 2 | 61.41 | 1220.591 | -8.2  |
| <b>CTWL</b> NVPLJKU | 84 | 427.8901 | 3 | 72.24 | 1280.667 | -14.4 |
| <b>TCGD</b> MEXHBKU | 83 | 472.1874 | 3 | 23.19 | 1413.547 | -4.4  |
| <b>VGQ</b> GEXEPEKU | 83 | 397.8483 | 3 | 24.28 | 1190.543 | -16.6 |
| <b>MDVG</b> SCPUVKU | 83 | 372.1703 | 3 | 25.12 | 1113.506 | -14.9 |
| <b>KPDON</b> CDDLKU | 83 | 417.5255 | 3 | 25.3  | 1249.562 | -6.1  |
| <b>DAH</b> XOLTLGKU | 83 | 426.5457 | 3 | 27.07 | 1276.628 | -10.4 |
| <b>DBjD</b> LYLVGKU | 83 | 469.2307 | 3 | 29.11 | 1404.681 | -7.7  |
| <b>KCTJ</b> PSHSCKU | 83 | 468.55   | 3 | 34.84 | 1402.643 | -10.7 |
| <b>MSBT</b> MPLPQKU | 83 | 436.2147 | 3 | 34.85 | 1305.638 | -11.7 |
| <b>NBMC</b> QLNDYKU | 83 | 468.1986 | 3 | 37.11 | 1401.597 | -16.5 |
| <b>PDLG</b> GANQUKU | 83 | 539.7697 | 2 | 37.49 | 1077.532 | -6.1  |
| <b>NNDj</b> KPMMYKU | 83 | 450.2054 | 3 | 39.4  | 1347.604 | -6.7  |
| <b>FVSAD</b> iHTFKU | 83 | 428.8743 | 3 | 39.98 | 1283.617 | -12.1 |
| <b>FMMQ</b> ADGHFKU | 83 | 605.77   | 2 | 41.96 | 1209.542 | -13.9 |
| <b>CSEM</b> VOZMLKU | 83 | 446.8657 | 3 | 42.23 | 1337.579 | -2.8  |
| <b>LENK</b> QFCMEKU | 83 | 423.5421 | 3 | 43.15 | 1267.605 | -0.6  |
| <b>EYDP</b> EDMjAKU | 83 | 435.8466 | 3 | 46.19 | 1304.531 | -10.1 |
| <b>VZTP</b> FcMTDKU | 83 | 442.872  | 3 | 47    | 1325.616 | -16.1 |
| <b>KYUV</b> MPTUYKU | 83 | 463.5639 | 3 | 48.22 | 1387.682 | -8.7  |
| <b>VGAV</b> CYPLFKU | 83 | 548.301  | 2 | 53.84 | 1094.595 | -6.7  |
| <b>ESMN</b> NNYYLKU | 83 | 637.7894 | 2 | 55.65 | 1273.576 | -9.4  |
| <b>MFAY</b> TQEMMKU | 83 | 639.7762 | 2 | 57.06 | 1277.561 | -18   |
| <b>LVFM</b> PFHjWKU | 83 | 471.5775 | 3 | 57.84 | 1411.72  | -6.2  |
| <b>TjSO</b> XLAGVKU | 83 | 654.3214 | 2 | 58.36 | 1306.636 | -6    |
| <b>TVYV</b> ULDEMKU | 83 | 426.2104 | 3 | 61.08 | 1275.628 | -14.6 |
| <b>jTG</b> FGXLQVKU | 83 | 639.3156 | 2 | 61.49 | 1276.639 | -17.8 |
| <b>MVZ</b> MMNLPQKU | 83 | 643.3063 | 2 | 69.06 | 1284.614 | -12.6 |
| <b>TDM</b> NEVMZLKU | 83 | 637.7891 | 2 | 76.23 | 1273.58  | -12.6 |
| <b>VGEM</b> VPMecKU | 83 | 606.7864 | 2 | 77.41 | 1211.576 | -14.5 |
| <b>WOLR</b> GADALKU | 83 | 411.5598 | 3 | 77.93 | 1231.669 | -9.1  |
| <b>VSTY</b> BSXSVKU | 82 | 455.5468 | 3 | 23.63 | 1363.643 | -18   |
| <b>TQA</b> ETYAAiKU | 82 | 405.8662 | 3 | 24.79 | 1214.58  | -2.5  |
| <b>UjM</b> MTEjHHKU | 82 | 504.2092 | 3 | 25.04 | 1509.63  | -15.8 |
| <b>FIMD</b> CLPQQKU | 82 | 373.425  | 4 | 25.33 | 1489.696 | -16.4 |

|              |    |          |   |       |          |       |
|--------------|----|----------|---|-------|----------|-------|
| LPPOKTAGGKU  | 82 | 357.8711 | 3 | 25.83 | 1070.61  | -17.1 |
| EEDPGALKTKU  | 82 | 362.8613 | 3 | 26    | 1085.572 | -8.6  |
| GUQMHDNcVKU  | 82 | 434.5292 | 3 | 27.32 | 1300.581 | -11.7 |
| BMCRUSACVKU  | 82 | 500.5612 | 3 | 27.85 | 1498.679 | -11.2 |
| FAWQRQVGEKU  | 82 | 416.5578 | 3 | 28.64 | 1246.657 | -4.4  |
| MYHREYRPMKU  | 82 | 353.1761 | 4 | 29.8  | 1408.686 | -7.2  |
| ATMUHPhjBKU  | 82 | 476.5507 | 3 | 29.87 | 1426.646 | -11.1 |
| SGQMSQGjYKU  | 82 | 597.2659 | 2 | 34.84 | 1192.527 | -7.9  |
| XGYEQYVGWVKU | 82 | 450.2049 | 3 | 35.17 | 1347.611 | -13.4 |
| VVTNNXBIMKU  | 82 | 398.4318 | 4 | 35.66 | 1589.718 | -12.3 |
| KKYPFRYEOKU  | 82 | 487.9312 | 3 | 36.88 | 1460.779 | -4.8  |
| VZBYOVLYKKU  | 82 | 397.2059 | 4 | 39.83 | 1584.812 | -10.8 |
| DNLHSMHETKU  | 82 | 404.1899 | 3 | 41.47 | 1209.556 | -6.8  |
| PGTPcYAPWKU  | 82 | 403.8728 | 3 | 42.1  | 1208.606 | -7.5  |
| YSGWYDTFKKU  | 82 | 431.8745 | 3 | 43.7  | 1292.619 | -13.4 |
| YPVVQXGTQKU  | 82 | 619.8127 | 2 | 47.17 | 1237.632 | -16.7 |
| THLPLTADJKU  | 82 | 420.886  | 3 | 52.33 | 1259.658 | -17.2 |
| VDGLTTEFFKU  | 82 | 385.8696 | 3 | 55.43 | 1154.597 | -8.8  |
| YLYVFUSUMKU  | 82 | 705.3345 | 2 | 58.48 | 1408.671 | -11.7 |
| VVSPYUFGVKU  | 82 | 587.8175 | 2 | 59.94 | 1173.629 | -7.6  |
| ZQFSDMMZDKU  | 82 | 695.7707 | 2 | 60.36 | 1389.544 | -12.5 |
| KFAWGTCTFFKU | 82 | 411.8746 | 3 | 61.46 | 1232.617 | -11.7 |
| VUjYDNYLVKU  | 82 | 701.341  | 2 | 62.31 | 1400.681 | -9.4  |
| DSBTVELPQKU  | 82 | 430.8828 | 3 | 62.78 | 1289.642 | -11.8 |
| SVGEYXFRIKU  | 82 | 480.2266 | 3 | 63.18 | 1437.677 | -13.1 |
| KFUSQbSFFKU  | 82 | 472.5672 | 3 | 64.09 | 1414.696 | -11.6 |
| QQMCPNVFEKU  | 82 | 408.1933 | 3 | 67.73 | 1221.564 | -4.4  |
| TLQAGAJTKKU  | 81 | 375.8776 | 3 | 25.68 | 1124.627 | -14.4 |
| TFFNWGNACKU  | 81 | 396.1842 | 3 | 26.68 | 1185.539 | -6.9  |
| PBGYRJTGAKU  | 81 | 348.1712 | 4 | 26.73 | 1388.671 | -10.8 |
| QTGVbFNQbKU  | 81 | 339.92   | 4 | 27.93 | 1355.662 | -8.2  |
| QLVGACCPSKU  | 81 | 502.7474 | 2 | 28.04 | 1003.494 | -14.1 |
| VYNFQTMEJKU  | 81 | 356.9165 | 4 | 28.45 | 1423.651 | -10.1 |
| EYVWKVSAGKU  | 81 | 583.3152 | 2 | 29.26 | 1164.629 | -11.4 |
| cNYNQETYGKU  | 81 | 655.2895 | 2 | 31.25 | 1308.582 | -13.1 |
| DiSGGDQEGKU  | 81 | 563.2351 | 2 | 34.34 | 1124.46  | -3.8  |
| ETCDPYPMDKU  | 81 | 399.8294 | 3 | 34.79 | 1196.484 | -14.9 |
| TFTEGiKjVKU  | 81 | 451.2245 | 3 | 36.95 | 1350.677 | -18.7 |
| LQMGABjSHKU  | 81 | 452.2133 | 3 | 40.81 | 1353.638 | -15.1 |
| FMMQADFGHKU  | 81 | 605.7715 | 2 | 42.14 | 1209.542 | -11.4 |
| VFAPLPMKTKU  | 81 | 377.5577 | 3 | 43.93 | 1129.668 | -15.1 |
| VGODSKGEVKU  | 81 | 374.5293 | 3 | 47.11 | 1120.574 | -6.8  |
| TGDFCVFSDKU  | 81 | 422.5262 | 3 | 48.08 | 1264.579 | -17.6 |
| KYOPECLVGKU  | 81 | 463.2446 | 3 | 49.78 | 1386.722 | -7.4  |
| DYLSYTMCDKU  | 81 | 462.5402 | 3 | 51.05 | 1384.604 | -3.4  |

|             |    |          |   |       |          |       |
|-------------|----|----------|---|-------|----------|-------|
| QDNJMELPcKU | 81 | 478.5551 | 3 | 52.12 | 1432.644 | -0.4  |
| QCSTTSFMEKU | 81 | 580.7482 | 2 | 54.21 | 1159.5   | -15.8 |
| LVFEMRQOFKU | 81 | 350.9362 | 4 | 55.15 | 1399.73  | -10   |
| QVFPQEDNNKU | 81 | 609.2924 | 2 | 58.09 | 1216.584 | -11.2 |
| FLSYFUNHHKU | 81 | 457.8909 | 3 | 60.73 | 1370.663 | -8.9  |
| GLJLQDTXjKU | 80 | 490.2335 | 3 | 22.63 | 1467.689 | -7.1  |
| IQNMKNQqSKU | 80 | 465.8866 | 3 | 23.42 | 1394.658 | -14.2 |
| LXFGVEGWIKU | 80 | 482.5639 | 3 | 23.98 | 1444.685 | -10.5 |
| WAEWGKVYEKU | 80 | 432.2221 | 3 | 24.09 | 1293.651 | -4.7  |
| cjEDYPbGHKU | 80 | 489.2104 | 3 | 28.65 | 1464.629 | -13.3 |
| cUTAKXWEGKU | 80 | 471.5538 | 3 | 29.14 | 1411.657 | -12.4 |
| TKGHLCFSFKU | 80 | 583.8024 | 2 | 29.51 | 1165.607 | -14.1 |
| HSQOFETCSKU | 80 | 423.8583 | 3 | 30.11 | 1268.547 | 5     |
| FIGLECLVGKU | 80 | 351.6836 | 4 | 30.82 | 1402.716 | -7.6  |
| MYVSMEUPRKU | 80 | 330.6619 | 4 | 30.85 | 1318.627 | -6.9  |
| GPAELAWYFKU | 80 | 394.2086 | 3 | 31.77 | 1179.608 | -3.2  |
| OEFVSYCUKU  | 80 | 463.1979 | 3 | 32.12 | 1386.589 | -12   |
| NDSTDNCTRKU | 80 | 434.2015 | 3 | 32.48 | 1299.587 | -3.3  |
| VQGGGGUGFKU | 80 | 493.2484 | 2 | 33.23 | 984.489  | -6.8  |
| TYGWTECMEKU | 80 | 465.5366 | 3 | 34.87 | 1393.604 | -11.4 |
| YALWKYEETKU | 80 | 443.8924 | 3 | 35.32 | 1328.677 | -16   |
| DANUEVSJUKU | 80 | 463.1985 | 3 | 35.49 | 1386.598 | -17.5 |
| KEcFHCMSTKU | 80 | 435.2013 | 3 | 36.52 | 1302.593 | -8.2  |
| DANLDJYSZKU | 80 | 462.5369 | 3 | 39.33 | 1384.596 | -5.4  |
| LCNVjDGSVKU | 80 | 430.8811 | 3 | 40.51 | 1289.64  | -14.3 |
| FMARUDQcQKU | 80 | 466.2195 | 3 | 42.83 | 1395.655 | -12.7 |
| FSCbCLTFKKU | 80 | 324.1584 | 4 | 43.59 | 1292.623 | -14   |
| EQMFjMGZTKU | 80 | 687.7896 | 2 | 44.66 | 1373.583 | -13.3 |
| OACLMBLPQKU | 80 | 461.2234 | 3 | 44.97 | 1380.671 | -16.2 |
| EVAVYMBGXKU | 80 | 464.2122 | 3 | 45.4  | 1389.641 | -19.1 |
| EFGGAGWFEKU | 80 | 563.7639 | 2 | 45.55 | 1125.524 | -10   |
| UAFYADLSMKU | 80 | 408.8594 | 3 | 45.67 | 1223.576 | -15.7 |
| LMVVQXGTQKU | 80 | 611.8155 | 2 | 47.1  | 1221.64  | -19.2 |
| QAVGDVGIWKU | 80 | 417.2061 | 3 | 47.74 | 1248.61  | -11   |
| MCENEVMZLKU | 80 | 645.7866 | 2 | 55.59 | 1289.557 | 1.5   |
| KMSQAMMPMKU | 80 | 394.5243 | 3 | 55.94 | 1180.559 | -6.5  |
| ZQFDMCYDKU  | 80 | 703.7675 | 2 | 56.03 | 1405.543 | -16.2 |
| VGAVGjPLbKU | 80 | 583.8209 | 2 | 56.51 | 1165.639 | -10.4 |
| TECDPYNNDKU | 80 | 599.2408 | 2 | 57.91 | 1196.477 | -8.1  |
| TGDYWBLPQKU | 80 | 461.2246 | 3 | 58.09 | 1380.663 | -7.8  |
| AIDTVELPQKU | 80 | 430.8828 | 3 | 62.58 | 1289.647 | -15.5 |
| LcEDVFFbUKU | 80 | 496.9013 | 3 | 63.21 | 1487.709 | -18.2 |
| ZEYLCCFBFKU | 80 | 507.8778 | 3 | 63.8  | 1520.638 | -17.5 |
| FPVVQNUPDKU | 80 | 611.8168 | 2 | 64.44 | 1221.626 | -5.2  |
| KLTQMNUDSKU | 80 | 622.306  | 2 | 66.18 | 1242.614 | -13.3 |

|              |    |          |   |       |          |       |
|--------------|----|----------|---|-------|----------|-------|
| DjLPLMPGHKU  | 80 | 608.3136 | 2 | 69    | 1214.62  | -6.2  |
| KFNCiTFFFKU  | 80 | 521.5892 | 3 | 76.56 | 1561.765 | -12.2 |
| KPCCYFNFLKU  | 80 | 631.3063 | 2 | 77.89 | 1260.615 | -13.2 |
| MGCYTALLFKU  | 80 | 382.5272 | 3 | 78.33 | 1144.577 | -15.4 |
| MGTCYALLFKU  | 80 | 573.2881 | 2 | 78.34 | 1144.577 | -13.7 |
| PISQMNVFEEKU | 80 | 457.2144 | 3 | 80.22 | 1368.635 | -9.7  |
| LEDTZTUDNKU  | 79 | 437.1952 | 3 | 22.23 | 1308.569 | -4.2  |
| DPUTSMSCLKU  | 79 | 436.8673 | 3 | 23.1  | 1307.599 | -14.8 |
| FDVQQRREKU   | 79 | 330.1889 | 4 | 23.62 | 1316.731 | -3.6  |
| VQRTFZMESKU  | 79 | 440.5538 | 3 | 24.4  | 1318.645 | -4.3  |
| PVNTLbLTHKU  | 79 | 310.678  | 4 | 26.18 | 1238.695 | -9.9  |
| jQTVGMjDNKU  | 79 | 655.2914 | 2 | 26.32 | 1308.582 | -10.7 |
| PBQTFLMUAKU  | 79 | 348.1712 | 4 | 26.86 | 1388.682 | -19.3 |
| DAHxbSLLGKU  | 79 | 320.16   | 4 | 27.17 | 1276.624 | -10.3 |
| TYNBTNUMTKU  | 79 | 476.2071 | 3 | 28.28 | 1425.626 | -18.6 |
| AGITEECMEKU  | 79 | 479.2046 | 3 | 33.39 | 1434.6   | -5.9  |
| KEGHFGUGMKU  | 79 | 390.5236 | 3 | 36.57 | 1168.556 | -6    |
| SLSMTCPZTKU  | 79 | 581.2649 | 2 | 36.6  | 1160.532 | -14.2 |
| LFSNHGSKAKU  | 79 | 363.2021 | 3 | 37.96 | 1086.594 | -8.2  |
| GLHFVQDZSKU  | 79 | 408.8685 | 3 | 38.75 | 1223.605 | -17.2 |
| WGFDEYAQEKU  | 79 | 424.5221 | 3 | 38.85 | 1270.562 | -13.7 |
| EPPFTGOWSKU  | 79 | 417.8665 | 3 | 39.36 | 1250.595 | -13.5 |
| LQMQQFDONKU  | 79 | 452.2137 | 3 | 40.89 | 1353.636 | -12.2 |
| LKUCCCLLKU   | 79 | 451.8893 | 3 | 41.19 | 1352.658 | -8.7  |
| DOMDOPNDLKU  | 79 | 452.1966 | 3 | 42.07 | 1353.575 | -4.9  |
| YQVSGDANYKU  | 79 | 572.2668 | 2 | 43.35 | 1142.536 | -14.4 |
| QQNQMYKKGKU  | 79 | 429.5421 | 3 | 43.85 | 1285.624 | -15   |
| DWScVPGMVKU  | 79 | 404.5287 | 3 | 44.35 | 1210.588 | -19.9 |
| SMLSZMMVNKU  | 79 | 412.1911 | 3 | 44.95 | 1233.567 | -12.5 |
| YTZCGDMTVKU  | 79 | 404.5049 | 3 | 46.71 | 1210.511 | -15.1 |
| SESLYMGFGKU  | 79 | 559.2628 | 2 | 47.72 | 1116.527 | -14.7 |
| QKYJLTDNNKU  | 79 | 463.5639 | 3 | 48.33 | 1387.68  | -7.2  |
| UKRPTAZGEKU  | 79 | 420.882  | 3 | 52.2  | 1259.648 | -19   |
| AGCbASFMEKU  | 79 | 580.7482 | 2 | 54.21 | 1159.497 | -13.1 |
| GMFLDCPTSKU  | 79 | 415.8699 | 3 | 54.92 | 1244.593 | -3.7  |
| VDGVPTFZVKU  | 79 | 385.8697 | 3 | 55.3  | 1154.608 | -18.3 |
| QNLETFMjSKU  | 79 | 435.873  | 3 | 57.67 | 1304.616 | -14.1 |
| XGGXEXYMFKU  | 79 | 497.5334 | 3 | 57.94 | 1489.592 | -9    |
| YLYCFGHTMKU  | 79 | 470.558  | 3 | 58.33 | 1408.666 | -10.1 |
| VVAEMHYRGKU  | 79 | 594.8112 | 2 | 61.47 | 1187.623 | -13   |
| LNKiDPFDMKU  | 79 | 447.5488 | 3 | 64.46 | 1339.646 | -15.9 |
| YLIFUGHTMKU  | 79 | 470.5582 | 3 | 78.32 | 1408.658 | -3.5  |
| MZLAFVDXTKU  | 79 | 669.8237 | 2 | 91.88 | 1337.63  | 2.3   |
| QQUXDAQGSKU  | 78 | 420.8516 | 3 | 23.42 | 1259.55  | -13.8 |
| VYRAFYCCSKU  | 78 | 347.4202 | 4 | 25.34 | 1385.662 | -7.2  |



|             |    |          |   |       |          |       |
|-------------|----|----------|---|-------|----------|-------|
| KGAWUPBTQKU | 78 | 343.172  | 4 | 25.56 | 1368.685 | -19.3 |
| RSVNiJFFKKU | 78 | 381.9513 | 4 | 25.81 | 1523.782 | -4    |
| YKjNZjDFKU  | 78 | 409.6808 | 4 | 26.63 | 1634.714 | -12.2 |
| TjSYGCCHFKU | 78 | 627.255  | 2 | 27.4  | 1252.509 | -10.6 |
| YSGDYWTFKKU | 78 | 431.8748 | 3 | 27.54 | 1292.619 | -12.5 |
| SLAMTACTPKU | 78 | 511.2563 | 2 | 30.13 | 1020.51  | -11.4 |
| TAMMLOPKKKU | 78 | 417.5679 | 3 | 30.32 | 1249.69  | -6.4  |
| SPAFZGFZKKU | 78 | 424.2121 | 3 | 30.58 | 1269.626 | -8.6  |
| EODPGNXbDKU | 78 | 472.5247 | 3 | 34.4  | 1414.569 | -11.6 |
| UQJZDMVACKU | 78 | 528.2291 | 3 | 34.44 | 1581.676 | -6.9  |
| CNSAWVVCVKU | 78 | 419.2095 | 3 | 35.53 | 1254.625 | -14.2 |
| ZMGKAFHANKU | 78 | 599.2942 | 2 | 36.52 | 1196.587 | -11.3 |
| YFSHWGKKCKU | 78 | 321.4155 | 4 | 36.86 | 1281.644 | -8.8  |
| VABVXFLYKKU | 78 | 487.9301 | 3 | 36.99 | 1460.784 | -10.7 |
| UAHFidVTMKU | 78 | 341.159  | 4 | 37.08 | 1360.621 | -10.5 |
| HFLGGAGBNKU | 78 | 587.7921 | 2 | 37.7  | 1173.585 | -12.6 |
| AFQHjLHCDKU | 78 | 436.2046 | 3 | 38.33 | 1305.601 | -6.8  |
| CFTEQYKUEKU | 78 | 452.2146 | 3 | 38.66 | 1353.614 | 6.3   |
| FHGViVFGYKU | 78 | 429.5506 | 3 | 38.72 | 1285.648 | -13.7 |
| DSEASKEZSKU | 78 | 587.7628 | 2 | 39.12 | 1173.526 | -12.8 |
| UOGLYNDXOKU | 78 | 379.9156 | 4 | 39.22 | 1515.648 | -9.2  |
| NTICKPMMYKU | 78 | 450.2057 | 3 | 39.33 | 1347.6   | -3.9  |
| FVSASjigFKU | 78 | 428.8743 | 3 | 40.63 | 1283.614 | -9.6  |
| KINDADPGCKU | 78 | 347.162  | 4 | 40.77 | 1384.629 | -7.2  |
| LMPGiDQLSKU | 78 | 407.8724 | 3 | 41.88 | 1220.609 | -11.1 |
| FMMQTCHSVKU | 78 | 605.7711 | 2 | 42.05 | 1209.546 | -14.9 |
| LNKMipMDMKU | 78 | 335.9122 | 4 | 44.34 | 1339.632 | -9.1  |
| VGcNKCnHYKU | 78 | 419.2037 | 3 | 44.37 | 1254.601 | -9.2  |
| TGYWDBLPQKU | 78 | 461.2234 | 3 | 45.09 | 1380.663 | -10.4 |
| WVYQAENUGKU | 78 | 637.3005 | 2 | 46.93 | 1272.6   | -10.6 |
| QPLTPbiFFKU | 78 | 357.9355 | 4 | 47.37 | 1427.728 | -10.8 |
| KFMFSXKFFKU | 78 | 357.9353 | 4 | 47.65 | 1427.728 | -11.2 |
| ZQLJCDFMEKU | 78 | 491.872  | 3 | 47.76 | 1472.613 | -13   |
| AGRMATiMEKU | 78 | 409.8604 | 3 | 48.13 | 1226.577 | -14.1 |
| bPGGYLAVHKU | 78 | 386.8725 | 3 | 49.48 | 1157.616 | -17.7 |
| KbCSKjAiKU  | 78 | 363.935  | 4 | 49.92 | 1451.736 | -17.4 |
| QTYDPVMMTKU | 78 | 606.7816 | 2 | 51.18 | 1211.568 | -15.8 |
| cNYHGfMYGKU | 78 | 655.2888 | 2 | 51.29 | 1308.579 | -12.1 |
| cPKDCPLOBKU | 78 | 472.5694 | 3 | 51.81 | 1414.682 | 2.9   |
| TMTTYPVMXKU | 78 | 645.8057 | 2 | 54.27 | 1289.601 | -3.1  |
| GJFSDMMZDKU | 78 | 695.7704 | 2 | 55.89 | 1389.54  | -9.8  |
| NEBGDDYADKU | 78 | 434.1786 | 3 | 56.52 | 1299.517 | -2.1  |
| ADUERCfDNKU | 78 | 638.7727 | 2 | 57.31 | 1275.542 | -8.3  |
| bGCLMBLPQKU | 78 | 461.2233 | 3 | 57.96 | 1380.666 | -13.2 |
| QKLYcCHSLKU | 78 | 656.845  | 2 | 60.51 | 1311.684 | -6.3  |

|              |    |          |   |       |          |       |
|--------------|----|----------|---|-------|----------|-------|
| AEYMTbOAFKU  | 78 | 461.2068 | 3 | 61.18 | 1380.621 | -16.4 |
| ZEYMTbOAFKU  | 78 | 753.3185 | 2 | 63.72 | 1504.648 | -17.2 |
| QMNVDGEPKLU  | 78 | 565.2817 | 2 | 64.32 | 1128.56  | -9.8  |
| YALEGKDJBKU  | 78 | 488.5708 | 3 | 71.29 | 1462.696 | -3.9  |
| XADDFVLLIKU  | 78 | 477.5685 | 3 | 72.55 | 1429.695 | -8.1  |
| DSVFLYMZTKU  | 78 | 649.3076 | 2 | 76.64 | 1296.617 | -12.7 |
| VVAEFjbFGKU  | 78 | 661.8293 | 2 | 94.3  | 1321.66  | -12.3 |
| KBFDVLTRIKU  | 77 | 524.6091 | 3 | 23.17 | 1570.827 | -14   |
| GPYEcAXHYKU  | 77 | 459.8688 | 3 | 25.18 | 1376.609 | -17.6 |
| KSTAcSETSKU  | 77 | 377.856  | 3 | 26.06 | 1130.565 | -16.4 |
| XMHNSMFCjKU  | 77 | 475.8534 | 3 | 26.88 | 1424.562 | -16.5 |
| LFFNDSDcHKU  | 77 | 439.2045 | 3 | 27.34 | 1314.607 | -11.7 |
| NGbcCETNSKU  | 77 | 421.8418 | 3 | 29.58 | 1262.525 | -16.8 |
| IAFBLQQFQKU  | 77 | 525.5921 | 3 | 29.64 | 1573.77  | -9.6  |
| GOAFRNYCMKU  | 77 | 431.5324 | 3 | 30.34 | 1291.582 | -4.8  |
| LFSLMMREAKU  | 77 | 306.9167 | 4 | 30.7  | 1223.652 | -11.4 |
| LDViSAGMJKU  | 77 | 440.5422 | 3 | 31.38 | 1318.616 | -8.6  |
| DjNGADDEOKU  | 77 | 425.8338 | 3 | 33.49 | 1274.5   | -15.7 |
| LAOSMPTUYKU  | 77 | 431.8723 | 3 | 35.31 | 1292.62  | -19   |
| YLOYbgJEDKU  | 77 | 506.5547 | 3 | 40.44 | 1516.663 | -13.9 |
| QELQYMUAPKU  | 77 | 429.5439 | 3 | 43.91 | 1285.624 | -10.7 |
| KMQMSCFQMKU  | 77 | 420.8581 | 3 | 44.02 | 1259.565 | -9.6  |
| WLAEOQNPHKU  | 77 | 332.1662 | 4 | 44.43 | 1324.654 | -13.5 |
| KCPCYFNFLKU  | 77 | 631.3056 | 2 | 45.16 | 1260.615 | -14.4 |
| GVjNMMNFLKU  | 77 | 421.2053 | 3 | 45.44 | 1260.608 | -11   |
| KjZSYPRCKU   | 77 | 483.2298 | 3 | 45.99 | 1446.68  | -8.4  |
| PQVOAcYWbKU  | 77 | 502.9087 | 3 | 46.16 | 1505.721 | -11.3 |
| AUEFEDTLSKU  | 77 | 609.7841 | 2 | 47.45 | 1217.568 | -11.6 |
| AUEGXNTLSKU  | 77 | 609.7842 | 2 | 47.78 | 1217.565 | -9    |
| bPGGYLGVHUKU | 77 | 382.2012 | 3 | 47.87 | 1143.601 | -16.4 |
| VTNTEAETOKU  | 77 | 399.1959 | 3 | 47.96 | 1194.574 | -7.1  |
| LNVLDTMECKU  | 77 | 582.7866 | 2 | 48.17 | 1163.568 | -8    |
| GVVDMNcALKU  | 77 | 380.5366 | 3 | 49.83 | 1138.588 | -0.5  |
| iPGGFPMVHUKU | 77 | 401.5353 | 3 | 52.22 | 1201.593 | -7.7  |
| LGGVFHHGKKU  | 77 | 539.8115 | 2 | 53.07 | 1077.62  | -10.3 |
| BVMGVWbVAKU  | 77 | 461.2382 | 3 | 53.1  | 1380.7   | -4.9  |
| TKGHLACYFKU  | 77 | 583.8041 | 2 | 53.33 | 1165.607 | -11.1 |
| NYcUQAMLAKU  | 77 | 437.8779 | 3 | 55.9  | 1310.627 | -11.5 |
| TJEAFSKDEKU  | 77 | 421.5318 | 3 | 56.85 | 1261.591 | -13.6 |
| FLSYUPVDSKU  | 77 | 617.8056 | 2 | 73.36 | 1233.614 | -14.3 |
| LFSYFHYSKU   | 77 | 441.2142 | 3 | 74.72 | 1320.633 | -9    |
| QVFPQDENNKU  | 77 | 609.2919 | 2 | 76.49 | 1216.584 | -12   |
| LAVDVWESQKU  | 77 | 587.3084 | 2 | 83.4  | 1172.619 | -14.2 |
| MKKTSOTIFKU  | 76 | 366.9371 | 4 | 23    | 1463.731 | -7.9  |
| IXLDRANLVKU  | 76 | 480.2522 | 3 | 26.27 | 1437.744 | -6.5  |

|             |    |          |   |       |          |       |
|-------------|----|----------|---|-------|----------|-------|
| EFGGAGSMPKU | 76 | 490.2314 | 2 | 27.06 | 978.4593 | -11.2 |
| YSTUQGQVOKU | 76 | 431.875  | 3 | 27.78 | 1292.612 | -7    |
| QMPKTYDJSKU | 76 | 435.8732 | 3 | 28.19 | 1304.616 | -13.6 |
| DHOGKQMMJKU | 76 | 481.882  | 3 | 28.3  | 1442.637 | -8.5  |
| KjDDLcRVAKU | 76 | 351.6885 | 4 | 28.74 | 1402.735 | -7.3  |
| TKGHFATMFKU | 76 | 583.8024 | 2 | 29.52 | 1165.607 | -14.1 |
| LFSLHcCLAKU | 76 | 408.8873 | 3 | 30.46 | 1223.657 | -13.4 |
| FDGPDDCTRKU | 76 | 434.2005 | 3 | 32.41 | 1299.591 | -8.5  |
| AGCSTTiMEKU | 76 | 580.7499 | 2 | 32.5  | 1159.487 | -1.4  |
| MQQYPRGVMKU | 76 | 309.9088 | 4 | 33    | 1235.627 | -16.8 |
| LNjTZGUSTKU | 76 | 435.2015 | 3 | 36.77 | 1302.604 | -16   |
| BNMRDGNDYKU | 76 | 693.7996 | 2 | 37.02 | 1385.595 | -7.3  |
| DMVTCPNDLKU | 76 | 378.8412 | 3 | 37.11 | 1133.521 | -17.1 |
| FEYODUVHQKU | 76 | 483.5506 | 3 | 37.68 | 1447.649 | -13.4 |
| TWQVFVKARKU | 76 | 421.256  | 3 | 38.87 | 1260.746 | 0.6   |
| LFSLSLcCAKU | 76 | 392.211  | 3 | 40.15 | 1173.63  | -15.8 |
| FEYTCNOZKKU | 76 | 477.5477 | 3 | 40.36 | 1429.631 | -6.8  |
| LYOPcMjEDKU | 76 | 376.1689 | 4 | 40.4  | 1500.662 | -10.2 |
| GcUcNYGPIKU | 76 | 449.1917 | 3 | 41.24 | 1344.562 | -6    |
| GbPQTFMjSKU | 76 | 441.2032 | 3 | 41.66 | 1320.607 | -14.7 |
| SLZFJAMLAKU | 76 | 447.5585 | 3 | 43.35 | 1339.666 | -9.4  |
| FAFcCMTCWKU | 76 | 443.8579 | 3 | 43.72 | 1328.558 | -4.9  |
| MCGMGGGPLKU | 76 | 475.2174 | 2 | 43.73 | 948.4344 | -14.8 |
| LELMbTEEMKU | 76 | 447.5469 | 3 | 44.22 | 1339.633 | -10.8 |
| ACFFYEVGVKU | 76 | 387.8602 | 3 | 44.25 | 1160.569 | -8.7  |
| VGEjKXOZEKU | 76 | 506.2243 | 3 | 47.21 | 1515.68  | -18.8 |
| VEYMSSUSPKU | 76 | 603.7745 | 2 | 47.94 | 1205.55  | -12.7 |
| WQDNWEGFMKU | 76 | 447.195  | 3 | 49.35 | 1338.582 | -13.8 |
| AYPNMTRVHKU | 76 | 405.8789 | 3 | 49.61 | 1214.634 | -16   |
| NEKTFVNCRKU | 76 | 413.221  | 3 | 50.15 | 1236.64  | 1.3   |
| MYPZANjSBKU | 76 | 496.8816 | 3 | 52.02 | 1487.639 | -10.6 |
| QNLGDTCFMKU | 76 | 578.2724 | 2 | 52.39 | 1154.521 | 7.8   |
| WiLGEGcFVKU | 76 | 454.892  | 3 | 52.57 | 1361.671 | -12.6 |
| KAHRTYDjGKU | 76 | 428.5546 | 3 | 53.15 | 1282.65  | -6.3  |
| CTGFDLSTJKU | 76 | 412.8596 | 3 | 55.79 | 1235.556 | 0.7   |
| cLGNQUMQVKU | 76 | 645.8215 | 2 | 58.18 | 1289.638 | -7.4  |
| NiCCExFFFKU | 76 | 497.534  | 3 | 58.21 | 1489.589 | -5.7  |
| APPPLCVFYKU | 76 | 567.3036 | 2 | 64.14 | 1132.61  | -15.5 |
| LMVVQGXTQKU | 76 | 611.8168 | 2 | 64.39 | 1221.64  | -17   |
| AAFFPTCYLKU | 76 | 580.2931 | 2 | 73.96 | 1158.59  | -15.5 |
| ELLGDTFMCKU | 76 | 578.2717 | 2 | 78.36 | 1154.546 | -15.2 |
| MGFcSTLLFKU | 76 | 573.287  | 2 | 78.44 | 1144.577 | -15.6 |
| KSCYViVOMKU | 76 | 465.5564 | 3 | 90.87 | 1393.661 | -10.1 |
| DPTSUMSCLKU | 75 | 436.8673 | 3 | 23.22 | 1307.599 | -14.7 |
| XfBUNCTVGKU | 75 | 511.8987 | 3 | 23.65 | 1532.69  | -10.4 |

|              |    |          |   |       |          |       |
|--------------|----|----------|---|-------|----------|-------|
| FSGSSKSJLKU  | 75 | 383.5319 | 3 | 26.76 | 1147.596 | -19   |
| KSTYTJSOAKU  | 75 | 649.3109 | 2 | 28.12 | 1296.629 | -17.1 |
| GVEEQKVEOKU  | 75 | 416.8868 | 3 | 28.97 | 1247.637 | 1.3   |
| SFSCMQDQSKU  | 75 | 580.2381 | 2 | 30.05 | 1158.48  | -15.6 |
| TFTEAGYKWKU  | 75 | 410.5434 | 3 | 31.39 | 1228.624 | -12.8 |
| DVAXMSDVNKU  | 75 | 399.8517 | 3 | 31.54 | 1196.536 | -2    |
| GHTLKSMiFKU  | 75 | 321.1694 | 4 | 34.35 | 1280.657 | -6.3  |
| EYVECGPKFKU  | 75 | 400.1996 | 3 | 34.44 | 1197.585 | -6.8  |
| TRRDMPNMBKU  | 75 | 474.8949 | 3 | 36.56 | 1421.682 | -13.6 |
| OANMCQFZYKU  | 75 | 468.1991 | 3 | 37.01 | 1401.582 | -4.4  |
| GVVDBCSMTKU  | 75 | 405.1868 | 3 | 37.05 | 1212.543 | -3.8  |
| PHGEjVVFYKU  | 75 | 337.662  | 4 | 37.31 | 1346.638 | -13.9 |
| PGHEYjVVFYKU | 75 | 449.8812 | 3 | 37.55 | 1346.638 | -11.8 |
| YNOFGKLVVKU  | 75 | 407.5657 | 3 | 38.19 | 1219.694 | -15.1 |
| EFAZHGHGKU   | 75 | 603.2642 | 2 | 42.04 | 1204.537 | -19.5 |
| EGALDEXMTKU  | 75 | 606.7644 | 2 | 42.48 | 1211.535 | -17.3 |
| MMBQYNbMHKU  | 75 | 525.5563 | 3 | 43.26 | 1573.661 | -8.8  |
| DQDMALjDXKU  | 75 | 455.1975 | 3 | 45.98 | 1362.571 | 0.1   |
| LCFDSXSLSKU  | 75 | 609.7846 | 2 | 47.62 | 1217.561 | -5.2  |
| AJPYPVZDGKU  | 75 | 436.2031 | 3 | 47.91 | 1305.606 | -14   |
| VYRMMGGNMKU  | 75 | 395.8564 | 3 | 50.71 | 1184.562 | -12.2 |
| PNYZbQCYLKU  | 75 | 530.245  | 3 | 51.6  | 1587.735 | -13.8 |
| jDMSLPLFIKU  | 75 | 483.9047 | 3 | 51.62 | 1448.695 | -1.6  |
| EPPFLHTYSKU  | 75 | 406.5425 | 3 | 52.13 | 1216.624 | -15.1 |
| RHTKAYDjGKU  | 75 | 428.5549 | 3 | 53.06 | 1282.65  | -5.7  |
| bCLYPVDZGKU  | 75 | 653.8029 | 2 | 54.4  | 1305.599 | -6.1  |
| KYFFCCQRTKU  | 75 | 490.9105 | 3 | 56.24 | 1469.73  | -13.9 |
| NGSCCcfYWKU  | 75 | 434.1772 | 3 | 56.42 | 1299.524 | -11.2 |
| jTEAFSbGPKU  | 75 | 421.5308 | 3 | 56.87 | 1261.588 | -13.6 |
| KEGLDTFPMKU  | 75 | 388.8732 | 3 | 57.7  | 1163.601 | -2.6  |
| QELQMFcPGKU  | 75 | 424.2124 | 3 | 59.3  | 1269.626 | -8    |
| TVYVGXLMMKU  | 75 | 420.8783 | 3 | 60.74 | 1259.627 | -10.9 |
| EGTSPPEEQKU  | 75 | 550.7649 | 2 | 60.8  | 1099.515 | 0.5   |
| QEMFjTDMHKU  | 75 | 687.7889 | 2 | 63.03 | 1373.583 | -14.1 |
| KLTQQcCDSKU  | 75 | 622.3068 | 2 | 66.23 | 1242.611 | -9.3  |
| MVfYETQPQKU  | 75 | 635.3097 | 2 | 68.97 | 1268.622 | -13.8 |
| YYLAMVsjDKU  | 75 | 452.2151 | 3 | 71.82 | 1353.634 | -8    |
| AcMPXRETVKU  | 74 | 336.9172 | 4 | 22.74 | 1343.66  | -14.9 |
| jESBVGVDIKU  | 74 | 503.2223 | 3 | 22.86 | 1506.673 | -18.4 |
| EVGPHAPiNKU  | 74 | 394.5311 | 3 | 24.23 | 1180.585 | -11.8 |
| MKGNOPJEFKU  | 74 | 473.8901 | 3 | 24.24 | 1418.658 | -6.9  |
| DSEASSKDJKU  | 74 | 587.762  | 2 | 24.33 | 1173.523 | -11.7 |
| MZXQLKTTGKU  | 74 | 440.8882 | 3 | 27.73 | 1319.652 | -6.8  |
| MAAGSTVOYKU  | 74 | 377.5187 | 3 | 28.27 | 1129.545 | -9.6  |
| EFEVSDVECKU  | 74 | 395.1756 | 3 | 31.17 | 1182.523 | -14.9 |

|             |    |          |   |       |          |       |
|-------------|----|----------|---|-------|----------|-------|
| TFTEQcPjVKU | 74 | 451.2234 | 3 | 37.06 | 1350.662 | -9.9  |
| TYLVHcGGNKU | 74 | 394.5378 | 3 | 37.72 | 1180.607 | -13   |
| ZMGKPPTMNKU | 74 | 399.8636 | 3 | 38.54 | 1196.579 | -8.6  |
| FHLGXVFGYKU | 74 | 429.5511 | 3 | 38.86 | 1285.647 | -11.8 |
| OGULYNDXOKU | 74 | 506.219  | 3 | 39.27 | 1515.648 | -8.2  |
| EGAVAQFAWKU | 74 | 553.2941 | 2 | 40.68 | 1104.572 | 2     |
| PASKYiPGEKU | 74 | 403.8728 | 3 | 42.09 | 1208.606 | -7.5  |
| QELDEYSSDKU | 74 | 606.7643 | 2 | 42.57 | 1211.531 | -13.5 |
| GiVGAMAXGKU | 74 | 572.2663 | 2 | 43.17 | 1142.527 | -7.7  |
| YQVQDSGGYKU | 74 | 572.2668 | 2 | 43.24 | 1142.536 | -14.4 |
| QNDJMELcPKU | 74 | 478.5556 | 3 | 43.77 | 1432.644 | 0.6   |
| MKKTjXSTEKU | 74 | 460.8958 | 3 | 46.16 | 1379.67  | -3.3  |
| LMGNQAGFSKU | 74 | 351.1795 | 3 | 46.84 | 1050.528 | -10.9 |
| KcGMPPYAGKU | 74 | 571.2916 | 2 | 46.95 | 1140.583 | -12.5 |
| FPVVQGXTQKU | 74 | 611.8151 | 2 | 47    | 1221.637 | -17.2 |
| AYPGGYRPHKU | 74 | 382.2011 | 3 | 47.75 | 1143.594 | -10.6 |
| YjLAYGPPCKU | 74 | 610.2899 | 2 | 48.69 | 1218.583 | -14.2 |
| DQKTFVNRCKU | 74 | 413.2216 | 3 | 50.04 | 1236.64  | 2.6   |
| CGAGGMWVUKU | 74 | 618.2889 | 2 | 51.44 | 1234.573 | -7.9  |
| EPPFLTYHSKU | 74 | 406.5436 | 3 | 51.85 | 1216.624 | -12.3 |
| iPNEDKTVSKU | 74 | 417.547  | 3 | 52.38 | 1249.617 | 1.9   |
| LELGDTYMCKU | 74 | 586.2695 | 2 | 52.69 | 1170.541 | -14.3 |
| ASFLJSSSNKU | 74 | 603.2892 | 2 | 53.04 | 1204.579 | -12.9 |
| NYCDYFYADKU | 74 | 434.1783 | 3 | 56.35 | 1299.523 | -7.7  |
| MiPDVFFFCKU | 74 | 505.5645 | 3 | 63.68 | 1513.7   | -18.5 |
| FPVVQNDUPKU | 74 | 611.8165 | 2 | 64.54 | 1221.626 | -5.8  |
| DjLPLATSYKU | 74 | 608.3129 | 2 | 67.43 | 1214.627 | -12.5 |
| ODALNVPLjKU | 74 | 641.3326 | 2 | 72.22 | 1280.671 | -15.7 |
| FLIYFFANDKU | 74 | 466.5576 | 3 | 80.84 | 1396.668 | -12.3 |
| KMQicTOQMKU | 73 | 396.441  | 4 | 22.84 | 1581.722 | 7.9   |
| EVGVAbGbSKU | 73 | 394.5322 | 3 | 24.07 | 1180.587 | -10.5 |
| HWSTTFKLGKU | 73 | 401.8868 | 3 | 24.9  | 1202.656 | -14.5 |
| YUQMDEYFKKU | 73 | 477.5469 | 3 | 24.93 | 1429.645 | -18   |
| VFSGTQicPKU | 73 | 449.8888 | 3 | 25.93 | 1346.655 | -7.8  |
| KHAHCMjAHKU | 73 | 473.5646 | 3 | 26.78 | 1417.682 | -7.1  |
| YNTTSCYilKU | 73 | 491.8972 | 3 | 29.14 | 1472.687 | -11.5 |
| TVAMTCPATKU | 73 | 511.2563 | 2 | 30.12 | 1020.51  | -11.4 |
| cNYGGUcYGKU | 73 | 663.2864 | 2 | 31.3  | 1324.575 | -12.3 |
| LGPCNBTVGKU | 73 | 388.1959 | 3 | 35.1  | 1161.577 | -9.4  |
| QYEGEWVFYKU | 73 | 337.6625 | 4 | 37.45 | 1346.629 | -6.2  |
| HFLHGANZGKU | 73 | 587.7925 | 2 | 37.79 | 1173.579 | -7.3  |
| DSBTVEPLQKU | 73 | 430.8831 | 3 | 40.86 | 1289.642 | -11.1 |
| YLOYQMGBCKU | 73 | 495.2187 | 3 | 41.37 | 1482.645 | -7.3  |
| DTCMVOMZLKU | 73 | 669.796  | 2 | 42.19 | 1337.579 | -1.2  |
| ZTTLNUJESKU | 73 | 432.5325 | 3 | 42.66 | 1294.59  | -11.1 |

|             |    |          |   |       |          |       |
|-------------|----|----------|---|-------|----------|-------|
| QELGAYFBGKU | 73 | 429.5435 | 3 | 44.15 | 1285.626 | -13.2 |
| LVDKGTcOVKU | 73 | 419.5649 | 3 | 45.84 | 1255.687 | -10.9 |
| YFEAUPPYSKU | 73 | 427.5348 | 3 | 46.94 | 1279.599 | -12.5 |
| KATjDDVYQKU | 73 | 425.8735 | 3 | 47.02 | 1274.623 | -18.7 |
| TYLVVMQCNKU | 73 | 599.3011 | 2 | 49.27 | 1196.605 | -14.1 |
| GVjNDENFLKU | 73 | 415.2019 | 3 | 52.11 | 1242.596 | -10   |
| WVYLTAZGEKU | 73 | 420.882  | 3 | 52.2  | 1259.63  | -4.4  |
| KMFHQDFFFKU | 73 | 344.1741 | 4 | 54.06 | 1372.675 | -5.6  |
| EcFSDMZMDKU | 73 | 695.7695 | 2 | 56.23 | 1389.541 | -11.9 |
| MbYMYFAGIKU | 73 | 506.8915 | 3 | 58.02 | 1517.65  | 1.5   |
| AGVFPYjDEKU | 73 | 617.2896 | 2 | 58.16 | 1232.58  | -12.2 |
| MGFQFELHFKU | 73 | 428.2125 | 3 | 67.64 | 1281.633 | -13.5 |
| DjYMTAMIFKU | 73 | 502.5476 | 3 | 68.18 | 1504.63  | -6    |
| FLSYPcAESKU | 73 | 617.8055 | 2 | 73.68 | 1233.611 | -11.6 |
| KOAEcjKFGKU | 73 | 441.5538 | 3 | 94.61 | 1321.643 | -2.8  |
| GVSVCJPFFKU | 72 | 345.1844 | 4 | 21.05 | 1376.722 | -10.1 |
| KDVKCXyFFKU | 72 | 345.1845 | 4 | 21.06 | 1376.713 | -3.3  |
| EVGQWATTYKU | 72 | 591.3046 | 2 | 23.9  | 1180.588 | 6     |
| ASGGLPECKU  | 72 | 563.7604 | 2 | 24.51 | 1125.519 | -11.6 |
| LTFfHNODLKU | 72 | 335.1707 | 4 | 24.89 | 1336.679 | -18.9 |
| LDcGTiYTLKU | 72 | 335.1711 | 4 | 25.07 | 1336.661 | -4.1  |
| PXQCRGKVEKU | 72 | 421.8831 | 3 | 25.36 | 1262.641 | -11   |
| KHTPVULTHKU | 72 | 310.678  | 4 | 26.18 | 1238.7   | -13.6 |
| LKTbYDGDSKU | 72 | 415.2061 | 3 | 26.67 | 1242.606 | -7.5  |
| QTVGAFFJcKU | 72 | 452.8913 | 3 | 27.93 | 1355.666 | -10.2 |
| KMGYTjSQFKU | 72 | 433.2095 | 3 | 28.04 | 1296.626 | -14.6 |
| SKTYMJAGFKU | 72 | 649.3109 | 2 | 28.12 | 1296.624 | -12.9 |
| OSEBXARbVKU | 72 | 535.917  | 3 | 28.66 | 1604.744 | -9    |
| CHZPDYPBHKU | 72 | 489.2116 | 3 | 28.82 | 1464.616 | -1.9  |
| cGXGGQVMXKU | 72 | 655.2902 | 2 | 31.17 | 1308.572 | -4.7  |
| FOHZAANVHKU | 72 | 331.1606 | 4 | 31.86 | 1320.634 | -15.4 |
| KTDJEQGMTKU | 72 | 434.8699 | 3 | 32.96 | 1301.599 | -8.6  |
| FKKAFVEPFKU | 72 | 310.6844 | 4 | 33.57 | 1238.718 | -7.4  |
| WGKNVFECKU  | 72 | 413.22   | 3 | 33.83 | 1236.644 | -4.6  |
| BQDKERTAIKU | 72 | 385.9431 | 4 | 34.74 | 1539.745 | -1    |
| SPYCPSHEjKU | 72 | 468.55   | 3 | 34.84 | 1402.63  | -1.3  |
| TYKMACIMEKU | 72 | 465.5352 | 3 | 35    | 1393.605 | -15   |
| LEFEGCKOOKU | 72 | 454.2169 | 3 | 35.76 | 1359.637 | -5.5  |
| LFLAAHMAKU  | 72 | 363.2013 | 3 | 38.15 | 1086.601 | -17.4 |
| IQNMQNKQSKU | 72 | 465.8959 | 3 | 39.23 | 1394.658 | 5.8   |
| FNTHbNMOOKU | 72 | 506.2189 | 3 | 39.37 | 1515.662 | -17.9 |
| EGTSPPEQEKU | 72 | 550.7651 | 2 | 39.4  | 1099.515 | 1     |
| YLOYXTYEDKU | 72 | 506.555  | 3 | 40.33 | 1516.659 | -10.8 |
| FVSAjYAGFKU | 72 | 399.8647 | 3 | 40.34 | 1196.595 | -19.1 |
| IACPAiNLLKU | 72 | 339.1686 | 4 | 41.2  | 1352.663 | -12.9 |

|                    |    |          |   |       |          |       |
|--------------------|----|----------|---|-------|----------|-------|
| <b>MXVGOVHLYKU</b> | 72 | 457.2256 | 3 | 42.25 | 1368.673 | -13.4 |
| <b>SGDVNRMbEKU</b> | 72 | 418.197  | 3 | 45    | 1251.585 | -12.2 |
| <b>EFAZCCTEGKU</b> | 72 | 665.2773 | 2 | 45.59 | 1328.552 | -8.9  |
| <b>LLPCWCQSAKU</b> | 72 | 574.2831 | 2 | 47.3  | 1146.568 | -14.2 |
| <b>DADXVFLYKKU</b> | 72 | 330.1691 | 4 | 47.38 | 1316.662 | -11.5 |
| <b>UNSDDiWYFKU</b> | 72 | 496.5421 | 3 | 47.64 | 1486.613 | -5.8  |
| <b>VTNTFPCTWKU</b> | 72 | 399.1954 | 3 | 48.05 | 1194.586 | -17.9 |
| <b>DNMAUiSCLKU</b> | 72 | 481.5457 | 3 | 49.86 | 1441.634 | -13.1 |
| <b>KMSAINKjFKU</b> | 72 | 484.9108 | 3 | 49.94 | 1451.717 | -4.1  |
| <b>DNbUMSSCLKU</b> | 72 | 481.5463 | 3 | 50    | 1441.629 | -8.2  |
| <b>TiLLTAGEZKU</b> | 72 | 420.8868 | 3 | 52.47 | 1259.638 | 0.7   |
| <b>FDTWMTVEGKU</b> | 72 | 404.8596 | 3 | 54.31 | 1211.565 | -6.3  |
| <b>AAFFPCTYLKU</b> | 72 | 387.1967 | 3 | 55.06 | 1158.59  | -18.4 |
| <b>KYICCNHYHKU</b> | 72 | 504.5459 | 3 | 55.44 | 1510.634 | -11.9 |
| <b>YFEAFSATbKU</b> | 72 | 427.5357 | 3 | 55.63 | 1279.605 | -15.6 |
| <b>KMDGODLGMKU</b> | 72 | 399.856  | 3 | 56.15 | 1196.554 | -6.8  |
| <b>YFEAFMRGDKU</b> | 72 | 631.7956 | 2 | 57.01 | 1261.591 | -11.6 |
| <b>LYGOAPFVHKU</b> | 72 | 412.2167 | 3 | 58.88 | 1233.652 | -19.1 |
| <b>TjOGYLGAVKU</b> | 72 | 610.8073 | 2 | 59.31 | 1219.618 | -14.6 |
| <b>TVYVUFGHMKU</b> | 72 | 420.8783 | 3 | 60.74 | 1259.623 | -8.2  |
| <b>LNCRbPFDMKU</b> | 72 | 447.5488 | 3 | 64.46 | 1339.635 | -7.4  |
| <b>VNFDVMRNVKU</b> | 72 | 407.5525 | 3 | 67.12 | 1219.65  | -11.4 |
| <b>QKMEASFMEKU</b> | 72 | 409.8607 | 3 | 68.2  | 1226.579 | -15.2 |
| <b>MVfyGwMPQKU</b> | 72 | 643.3063 | 2 | 69.06 | 1284.615 | -12.9 |
| <b>AAfCAQQYLKU</b> | 72 | 571.2868 | 2 | 77.62 | 1140.575 | -13.9 |
| <b>AAfQMNGYLKU</b> | 72 | 571.2888 | 2 | 77.76 | 1140.575 | -10.5 |
| <b>VVAEUHWAOKU</b> | 72 | 441.5543 | 3 | 94.51 | 1321.654 | -9.9  |
| <b>ADCPYEQJDKU</b> | 71 | 445.185  | 3 | 24.19 | 1332.536 | -2.3  |
| <b>HPLYNCCHMKU</b> | 71 | 415.5172 | 3 | 24.82 | 1243.541 | -9.2  |
| <b>SSAAPPAQMKU</b> | 71 | 493.7539 | 2 | 25.92 | 985.5015 | -8.3  |
| <b>VGSYGVWiSKU</b> | 71 | 405.8722 | 3 | 25.96 | 1214.595 | -0.3  |
| <b>SSAAPPCVQKU</b> | 71 | 493.7527 | 2 | 25.99 | 985.5015 | -10.7 |
| <b>AXKVSAOPGKU</b> | 71 | 394.2042 | 3 | 28.18 | 1179.612 | -18.1 |
| <b>GTBbCZVMTKU</b> | 71 | 476.2077 | 3 | 28.18 | 1425.615 | -9.6  |
| <b>QMLNVYDjSKU</b> | 71 | 435.8732 | 3 | 28.2  | 1304.616 | -13.6 |
| <b>UcTASATWBKU</b> | 71 | 471.5538 | 3 | 29.15 | 1411.651 | -8.3  |
| <b>IFGLEPLFYKU</b> | 71 | 351.6836 | 4 | 30.83 | 1402.714 | -5.9  |
| <b>cNYFGHMYGKU</b> | 71 | 655.2906 | 2 | 31.55 | 1308.579 | -9.3  |
| <b>EPPEGEUVSKU</b> | 71 | 575.774  | 2 | 38.08 | 1149.542 | -6.9  |
| <b>YQTCLLLNLKU</b> | 71 | 403.2306 | 3 | 38.38 | 1206.679 | -7.9  |
| <b>FEYOANUEFKU</b> | 71 | 358.4121 | 4 | 40.31 | 1429.627 | -5.7  |
| <b>SCBPAiNLLKU</b> | 71 | 339.1686 | 4 | 41.09 | 1352.658 | -9.2  |
| <b>FAMASSDETKU</b> | 71 | 543.2419 | 2 | 41.35 | 1084.486 | -15.3 |
| <b>AFMAPSCMTKU</b> | 71 | 543.2419 | 2 | 41.35 | 1084.487 | -16.2 |
| <b>EFAACCTEGKU</b> | 71 | 603.2641 | 2 | 43.48 | 1204.525 | -9.1  |

|             |    |          |   |       |          |       |
|-------------|----|----------|---|-------|----------|-------|
| KIECQAYPAKU | 71 | 443.21   | 3 | 43.6  | 1326.624 | -12.2 |
| KYFDLSQZTKU | 71 | 441.89   | 3 | 44.18 | 1322.662 | -10.4 |
| ADSMYEibGKU | 71 | 451.1892 | 3 | 45.66 | 1350.56  | -10.3 |
| RLWGcTFGVKU | 71 | 419.5649 | 3 | 45.84 | 1255.69  | -14   |
| GNbDDDMTVKU | 71 | 404.5054 | 3 | 46.61 | 1210.511 | -13.4 |
| LLZCGMFSAKU | 71 | 582.28   | 2 | 47.47 | 1162.563 | -14.8 |
| LYMMVGOBSKU | 71 | 469.5515 | 3 | 48.48 | 1405.655 | -15.7 |
| TYLVVNGCWKU | 71 | 591.3021 | 2 | 49.57 | 1180.606 | -14.1 |
| EKLJRKLELKU | 71 | 356.2147 | 4 | 49.68 | 1420.847 | -12.1 |
| QTYDPNCKTKU | 71 | 598.7839 | 2 | 51.21 | 1195.566 | -10.3 |
| QGVLCPYVEKU | 71 | 567.7949 | 2 | 51.77 | 1133.59  | -13.3 |
| FVRMANEBFKU | 71 | 472.5692 | 3 | 51.88 | 1414.698 | -8.7  |
| GTFLJNSSSKU | 71 | 603.2894 | 2 | 52.93 | 1204.579 | -12.6 |
| USGGQPfJLKU | 71 | 407.8711 | 3 | 53.06 | 1220.602 | -8.8  |
| MMOETEcGjKU | 71 | 477.8623 | 3 | 55.14 | 1430.587 | -15.3 |
| KPWQCIEWLKU | 71 | 377.6854 | 4 | 57.73 | 1506.73  | -11.3 |
| VVSFVCPPOKU | 71 | 393.5447 | 3 | 60.1  | 1177.618 | -4.9  |
| VUWWDXGLVKU | 71 | 701.3401 | 2 | 62.42 | 1400.685 | -13.8 |
| CPGLDEXMTKU | 71 | 606.7625 | 2 | 66.8  | 1211.518 | -6    |
| FTFQSMdbGKU | 71 | 639.2849 | 2 | 68.08 | 1276.573 | -13.6 |
| YTLVVMEEAKU | 71 | 591.3036 | 2 | 71.28 | 1180.616 | -19.9 |
| YYLAFGDCQKU | 71 | 452.2148 | 3 | 71.75 | 1353.642 | -14.3 |
| INEPFFYQWKU | 71 | 516.8998 | 3 | 74.12 | 1547.705 | -17.5 |
| AAFAQCQYLKU | 71 | 571.2877 | 2 | 77.87 | 1140.575 | -12.4 |
| YLYVFSIPCKU | 71 | 470.5573 | 3 | 78.51 | 1408.67  | -14.2 |
| LFiYVNEDHKU | 71 | 466.5576 | 3 | 80.85 | 1396.664 | -9.5  |
| MXYVSVKWQKU | 71 | 694.3459 | 2 | 93.63 | 1386.698 | -14.7 |



## ELISA

**Buffer A (1x PBS, pH = 7.2 + 0.05% Tween 20)**

**Buffer B (FBS 10%, 0.05% Tween 20, 1x PBS, pH = 7.2)**

An ELISA plate (96-well format) was washed with buffer A (3 x 200  $\mu$ L per well). Nucleobase peptide library, peptide library or peptide **38** were added, each to three wells (each 100  $\mu$ L, 100  $\mu$ M in buffer A) and incubated for 1 h at room temperature. After this time, the supernatant was removed and the wells treated with blocking buffer (buffer B, 100  $\mu$ L per well) and incubated overnight. A DNA library (Biotin-N<sub>20</sub>, 50  $\mu$ M in buffer A) was heated to 95 °C for 5 min and let cool down to room temperature over 15 minutes. DNA library (50  $\mu$ M in buffer A, 100  $\mu$ L per well) was added to all wells and incubated for 1 h at room temperature. The supernatant was removed, and the wells washed (2 x 200  $\mu$ L buffer A per well). SA-HRP (1:2000 dilution) was added to each well and incubated 30 minutes. All wells were washed (2 x 200  $\mu$ L buffer A per well). TMB ELISA substrate was added to the wells (50  $\mu$ L) and after 5 minutes quenched with sulfuric acid (50  $\mu$ L). The absorbance at 450 nm was determined for all treated wells.

## Affinity selection

**Buffer A:** Tris 10 mM pH = 7.5; NaCl 150 mM; MgCl<sub>2</sub> 10 mM

**Buffer B:** Tris 20mM pH = 7.5; NaCl 300 mM; MgCl<sub>2</sub> 20 mM; Tween 0.05 %; Yeast RNA 0.2 mg/mL; Biotin 2 mM

**Buffer C:** Guanidine-HCl 6 M, pH = 6.8; Phosphate 200 mM

Pre-miR-21 or pre-miR-155 (10  $\mu$ M, 50  $\mu$ L) was diluted to 500  $\mu$ L with buffer A and heated to 95°C for 5 minutes and then left cooling down to room temperature for 15 minutes. 400  $\mu$ L (4 mg) MyOne streptavidin beads were washed with buffer A (2 x 1 mL) and then incubated with biotin-pre-miRNA (21 or 155; 500  $\mu$ L, 1  $\mu$ M in Buffer A) at 4 °C for 30 minutes. The supernatant was removed, and the beads washed with buffer C (3 x 1 mL). The beads (for each miRNA) were divided in 4 parts and incubated with buffer B (800  $\mu$ L) + library (200  $\mu$ L, 6.25 mM in 1X PBS + 5 % DMF) for 120 minutes at 4 °C. After this time the supernatant removed and the beads washed with 2 x 500  $\mu$ L Buffer A. To elute bound library members the beads were treated with 2 x 100  $\mu$ L Buffer C. All samples were desalted with C18 ZipTips and lyophilized. The samples were taken up in water with 0.1% formic acid and analyzed by nanoLC-MS/MS. In parallel a control selection was performed on beads not loaded with miRNA, all other steps were identical.

## General procedure for biolayer interferometry (BLI)

Lyophilized peptides biotinylated on C-term lysine was dissolved to 1 mg/mL in 1x PBS and diluted 50-fold into 0.02% Tween-20, 1x PBS ('kinetic buffer') for immobilization onto streptavidin Octet biosensors (ForteBio; Menlo Park, CA). Biolayer interferometry (BLI) assays were performed in 96 well plates (GreinerBio-One; Kremsmünster, Austria; polypropylene, flat-bottom, chimney well) using an Octet Red96 System (ForteBio; Menlo Park, CA). Wells were filled with 200  $\mu$ L of kinetic buffer, peptide solution, or RNA solution (prepared in kinetic buffer). Biotinylated peptide was immobilized onto the streptavidin tip for 120 s. Sensors were then dipped into kinetic buffer for 60 s, RNA solution (1  $\mu$ M, 500 nM, 100 nM, 20 nM, 4 nM or 0.8 nM) for 300 s, and finally into kinetic buffer for 300 s. Measurements were carried out at 30 °C.

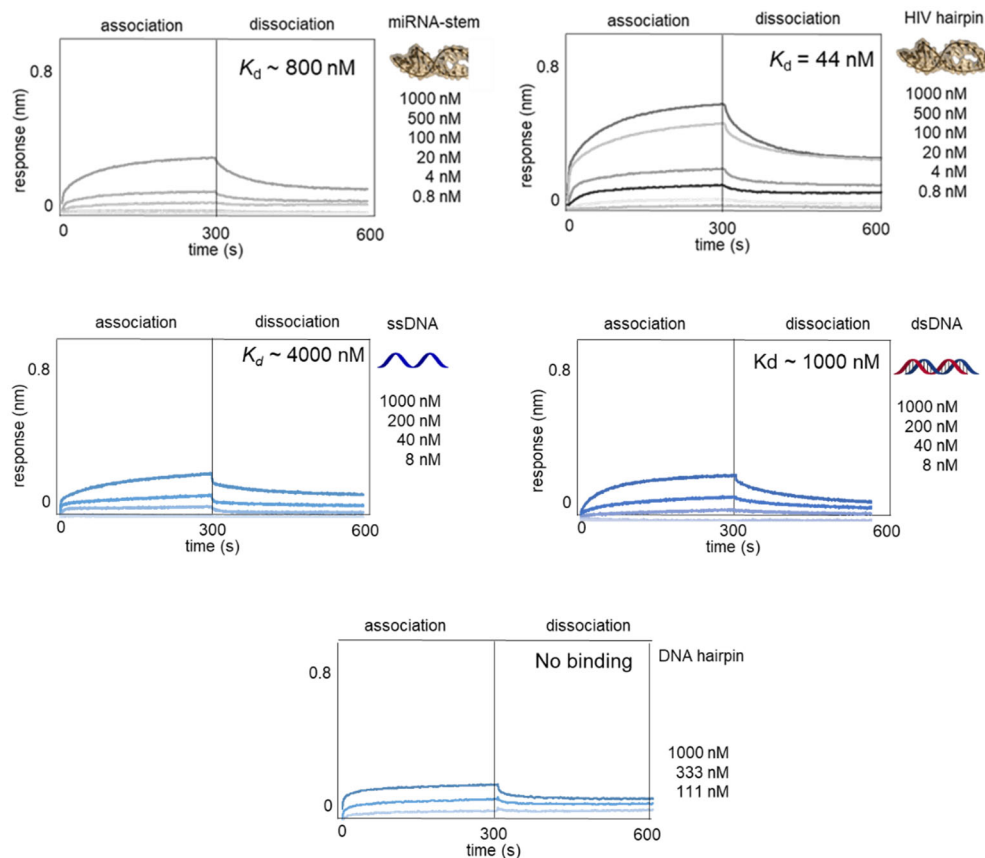

**SI Figure 1. BLI curves ds-miRNA-stem, HIV hairpin, ssDNA, dsDNA and DNA hairpin.** BLI tips with immobilized nucleobase peptide were dipped into solution containing RNA (association, 300 sec). RNA concentration range: 1000 nM, 500 nM, 100 nM, 20 nM, 4 nM, 0.8 nM. Dissociation was performed for 300 sec in kinetic buffer. miRNA-stem sequence: UAGCUUAUCAGACUGAUGUUG; CAACACCAGUCGAUGGGCUG. RNA harpin sequence: CGUGUCUUGGAGUGCUGAUCGGACACC. ssDNA and dsDNA sequence: CCGGCTGACACGTGGTATTAAT. DNA hairpin sequence: AGCTTATCAGACTGATGTTGACTGTTGAATCTCATGGCAACACC AGTCGATGGGCT. All oligonucleotides before usage were heated to 95°C for 5 minutes and let cool to room temperature over 15 minutes.

## BLI curves alanine scan

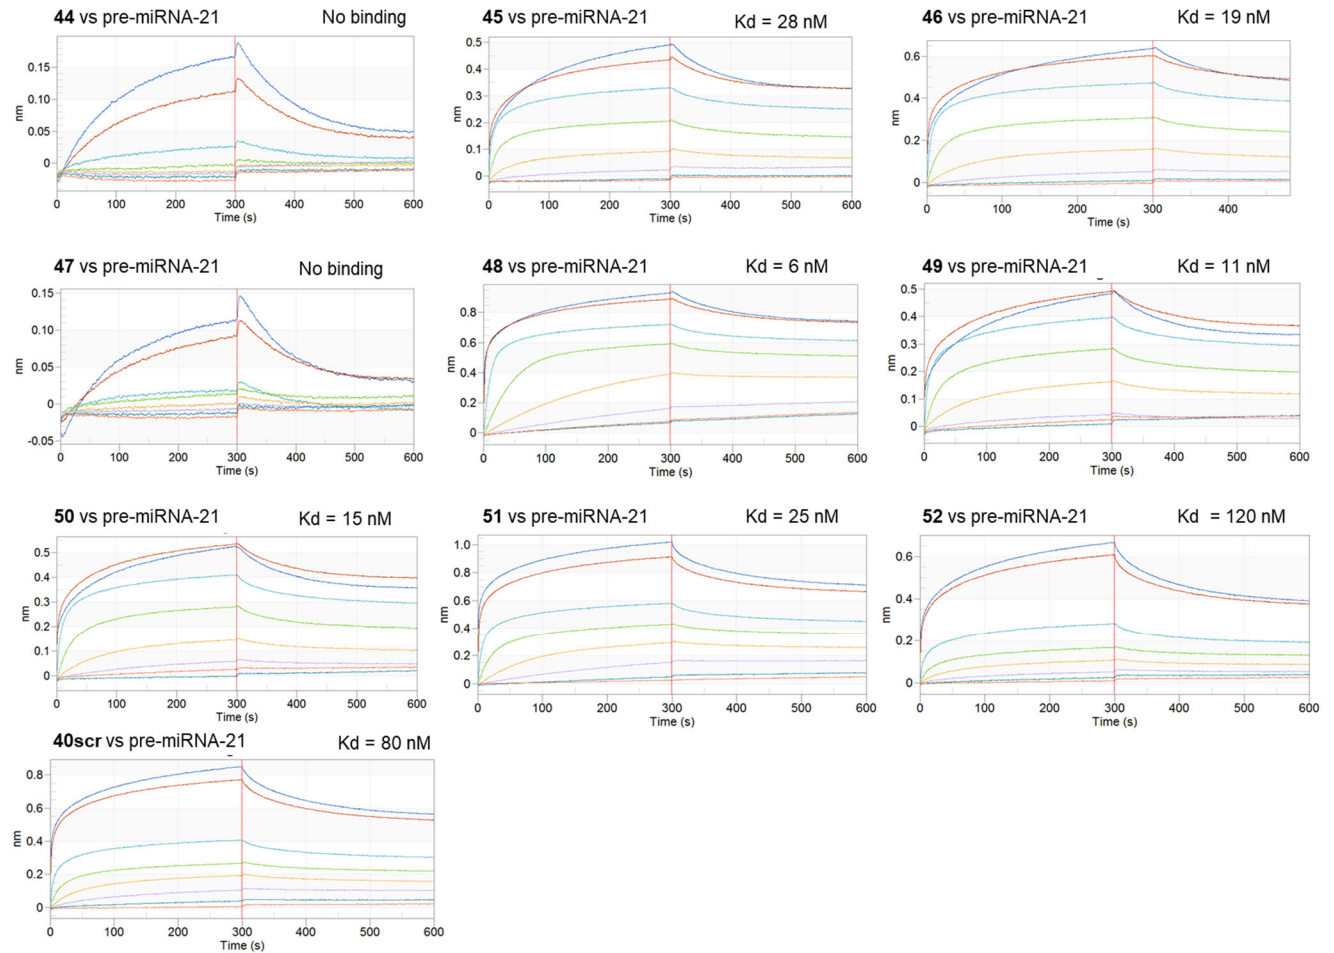

**SI Figure 2. Biolayer interferometry association and dissociation curves for alanine scan and scrambled hit.** BLI tips with immobilized nucleobase peptide were dipped into solution containing pre-miRNA21 (association, 300 sec). RNA concentration range: 1000 nM, 500 nM, 100 nM, 20 nM, 4 nM, 0.8 nM. Dissociation was performed for 300 sec in kinetic buffer.

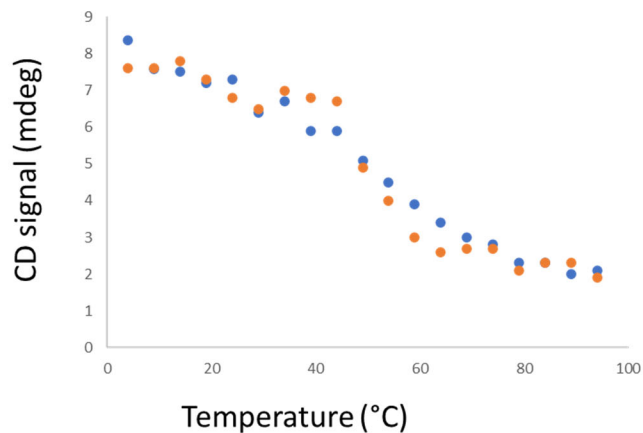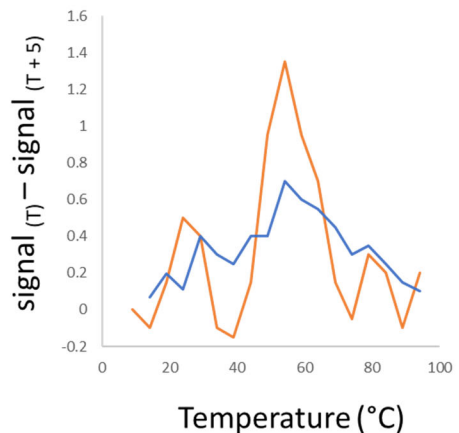

**SI Figure 3.** Melting curves of pre-miRNA-21 and pre-miRNA-21 + **39**, determined by circular dichroism (CD) at 260 nm. Samples were dissolved in 10 mM MES, 150 mM KCl, 1mM MgCl<sub>2</sub>, 10% glycerol at 5  $\mu$ M final concentration. Prior to measurement samples were heated to 95°C for 5 minutes and cooled down to room temperature over 15 minutes.
